# Supplementary material for: Single-cell transcriptomics of the human placenta: inferring the cell communication network of the maternal-fetal interface
Source: PubMed Central journal article supplement — Genome Res. 2017 Mar;27(3):349–61. doi: 10.1101/gr.207597.116 (PMC5340963; doi:10.1101/gr.207597.116), 2017-03
Supplement: supp_gr.207597.116_Supplemental_Fig_S1.pdf [file supp_gr.207597.116_Supplemental_Fig_S1.pdf]

A

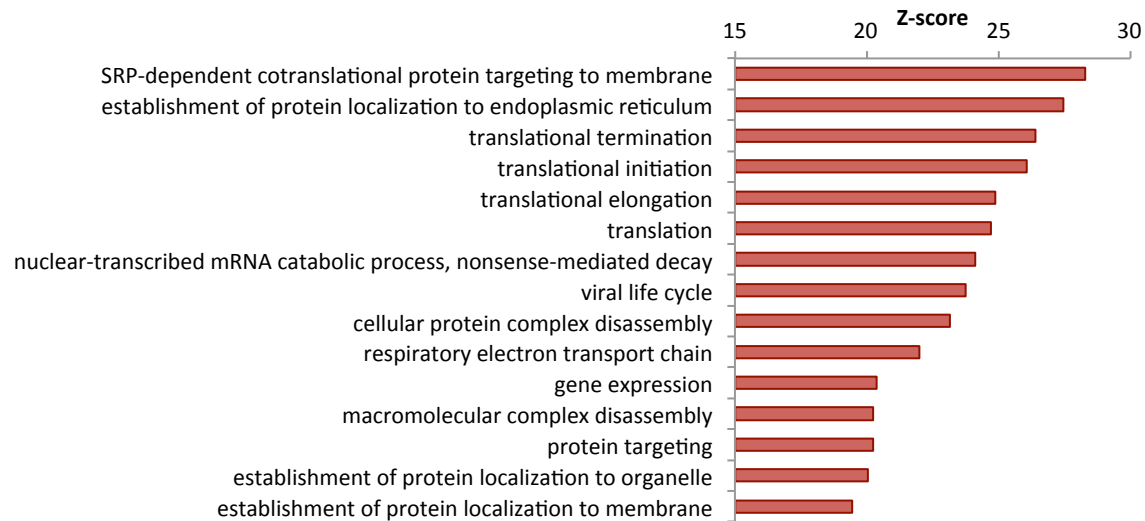

B

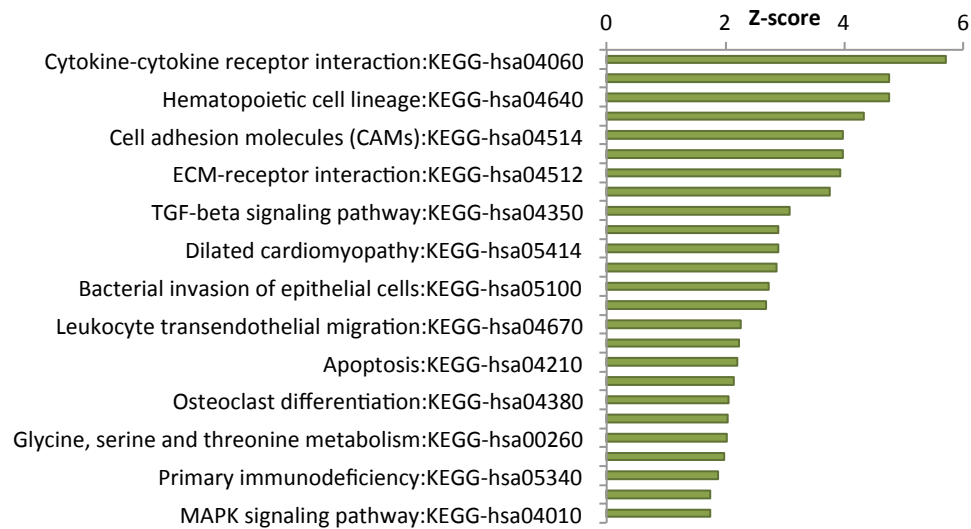

**Figure S1:** A: Characterization of downregulated genes in C1 relative to C2 and C3 by enriched Gene Ontology terms.

B: Characterization by enriched KEGG pathways of upregulated genes in extravillous trophoblast as compared to intravillous cytotrophoblast (C1-C3).
