# Supplementary material for: Single-cell transcriptomics of the human placenta: inferring the cell communication network of the maternal-fetal interface
Source: PubMed Central journal article supplement — Genome Res. 2017 Mar;27(3):349–61. doi: 10.1101/gr.207597.116 (PMC5340963; doi:10.1101/gr.207597.116), 2017-03
Supplement: supp_gr.207597.116_Supplemental_Fig_S3.pdf [file supp_gr.207597.116_Supplemental_Fig_S3.pdf]

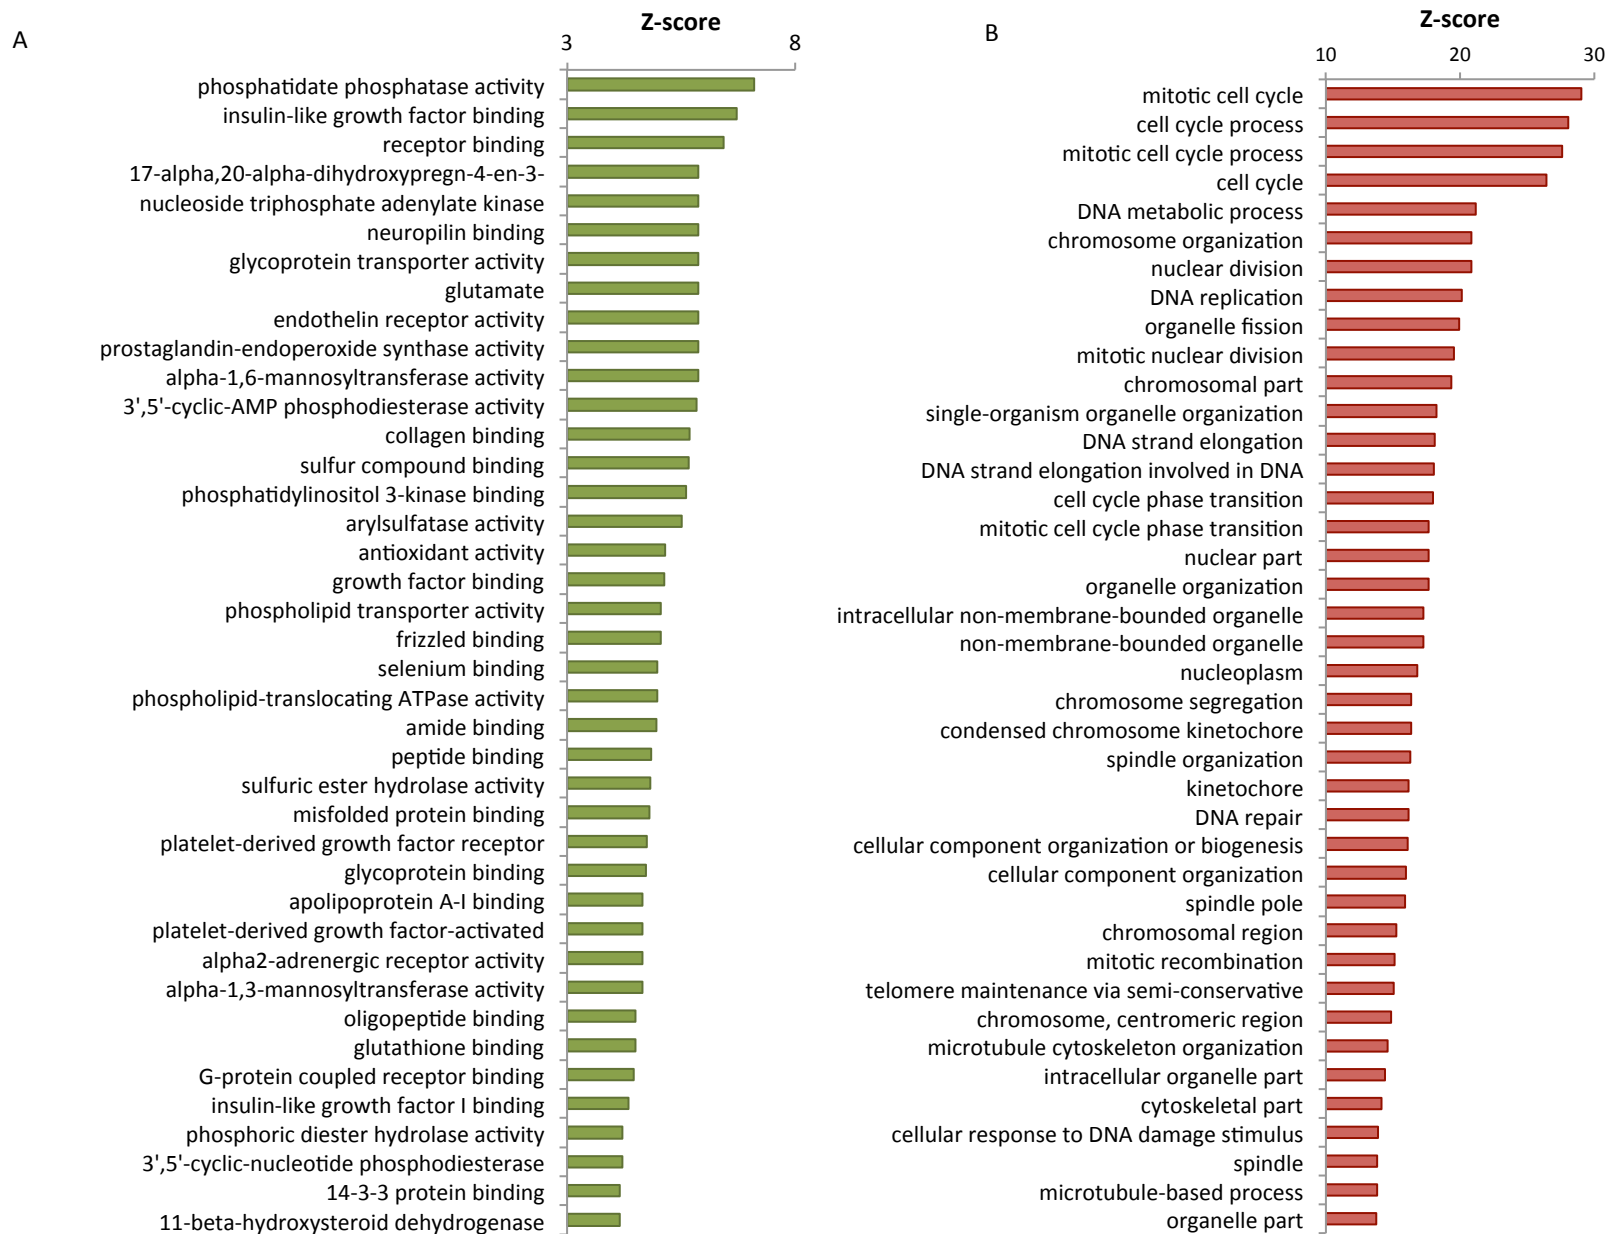

**Figure S3:** Enriched GO terms in the gene set A) upregulated and B) downregulated in extravillous trophoblast relative to other trophoblast cells.
