# Supplementary material for: Single-cell transcriptomics of the human placenta: inferring the cell communication network of the maternal-fetal interface
Source: PubMed Central journal article supplement — Genome Res. 2017 Mar;27(3):349–61. doi: 10.1101/gr.207597.116 (PMC5340963; doi:10.1101/gr.207597.116), 2017-03
Supplement: supp_gr.207597.116_Supplemental_Fig_S4.pdf [file supp_gr.207597.116_Supplemental_Fig_S4.pdf]

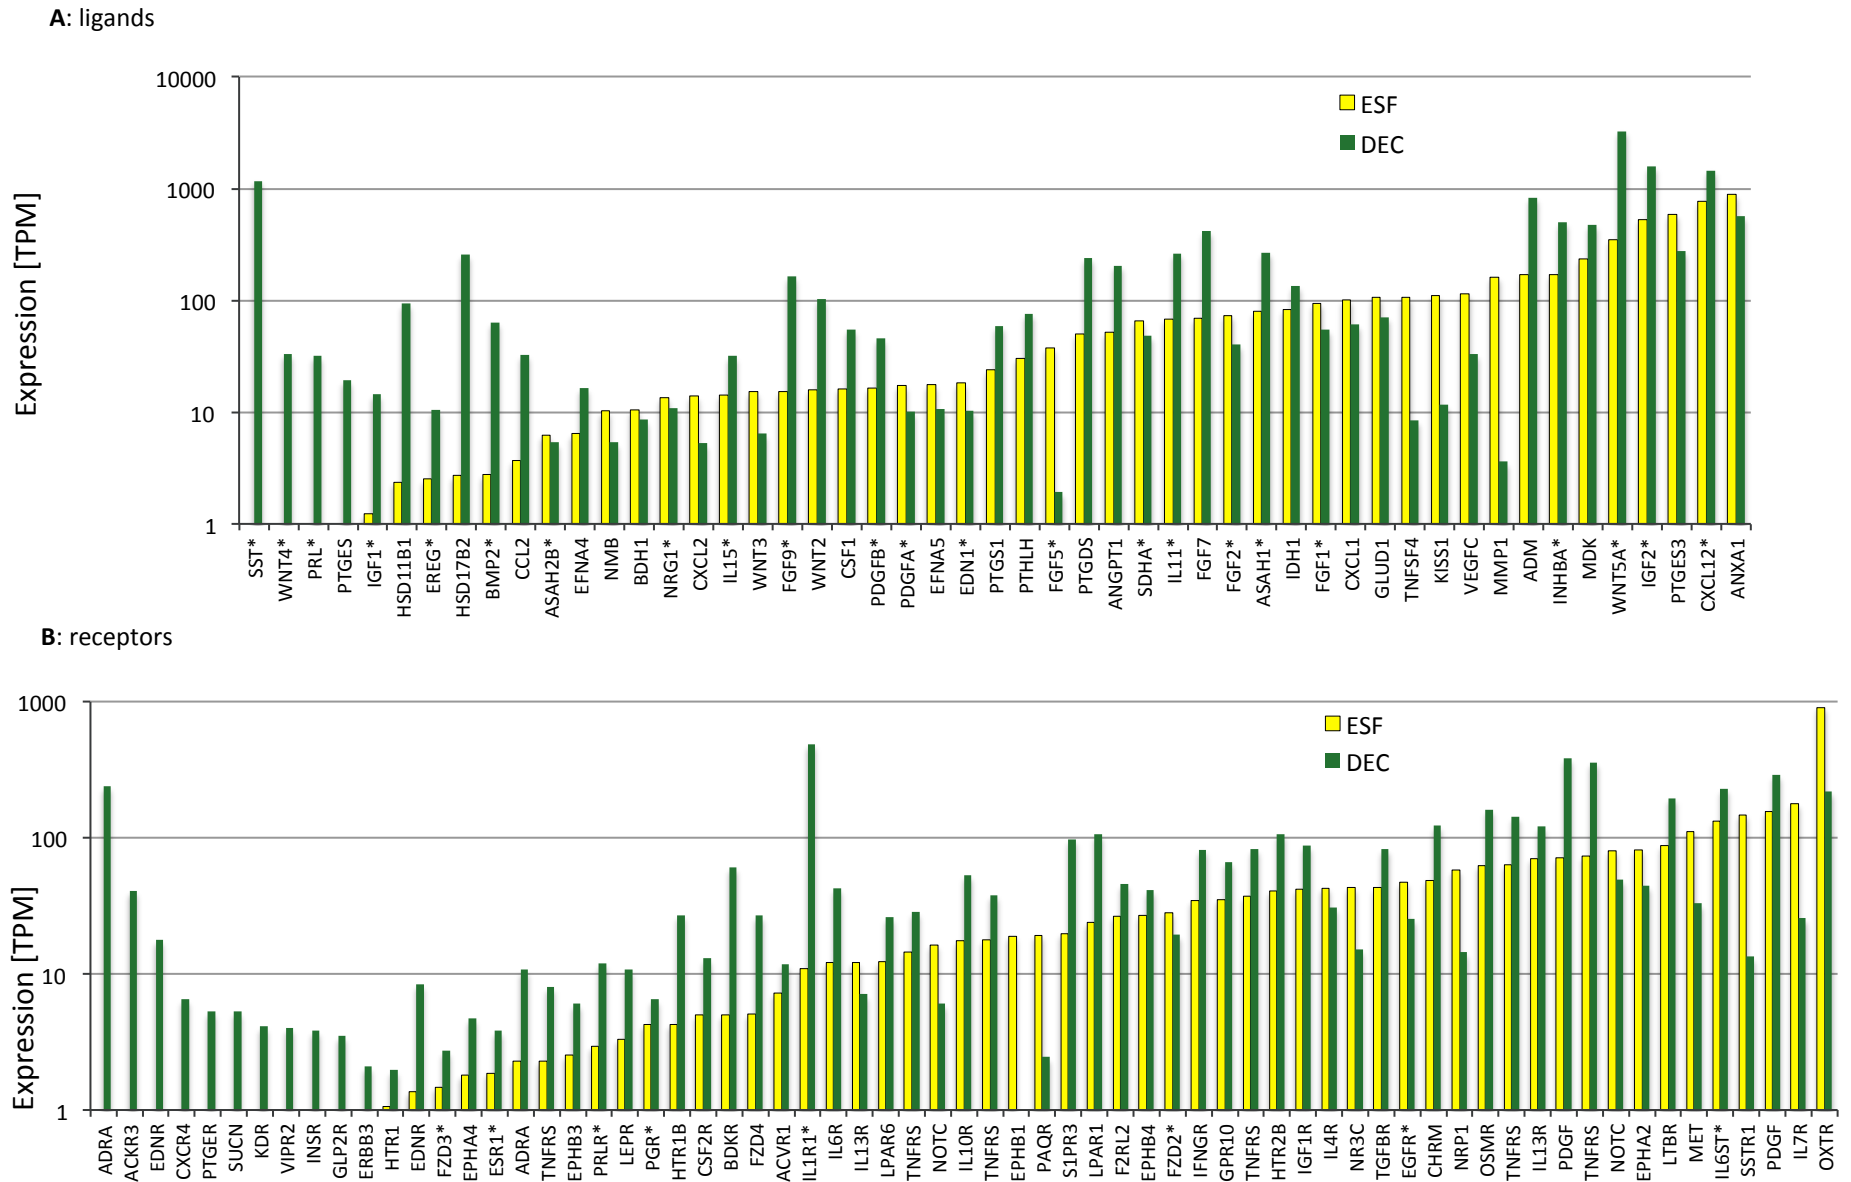

**Figure S4:** Receptor and ligand expression in ESF and DEC (>2TPM). (A): the expression levels (in TPM) of receptors and ligands (B), which are expressed in uterine stromal cells. The asterisks at the gene names in plot A denote ligands, for which the corresponding receptors are expressed in extravillous and syncytiotrophoblast. Analogously, the asterisks at the gene names of receptors in plot B denote those, for which the ligands are expressed in adjacent trophoblasts.
