# Supplementary material for: Single-cell transcriptomics of the human placenta: inferring the cell communication network of the maternal-fetal interface
Source: PubMed Central journal article supplement — Genome Res. 2017 Mar;27(3):349–61. doi: 10.1101/gr.207597.116 (PMC5340963; doi:10.1101/gr.207597.116), 2017-03
Supplement: supp_gr.207597.116_Supplemental_Fig_S6.pdf [file supp_gr.207597.116_Supplemental_Fig_S6.pdf]

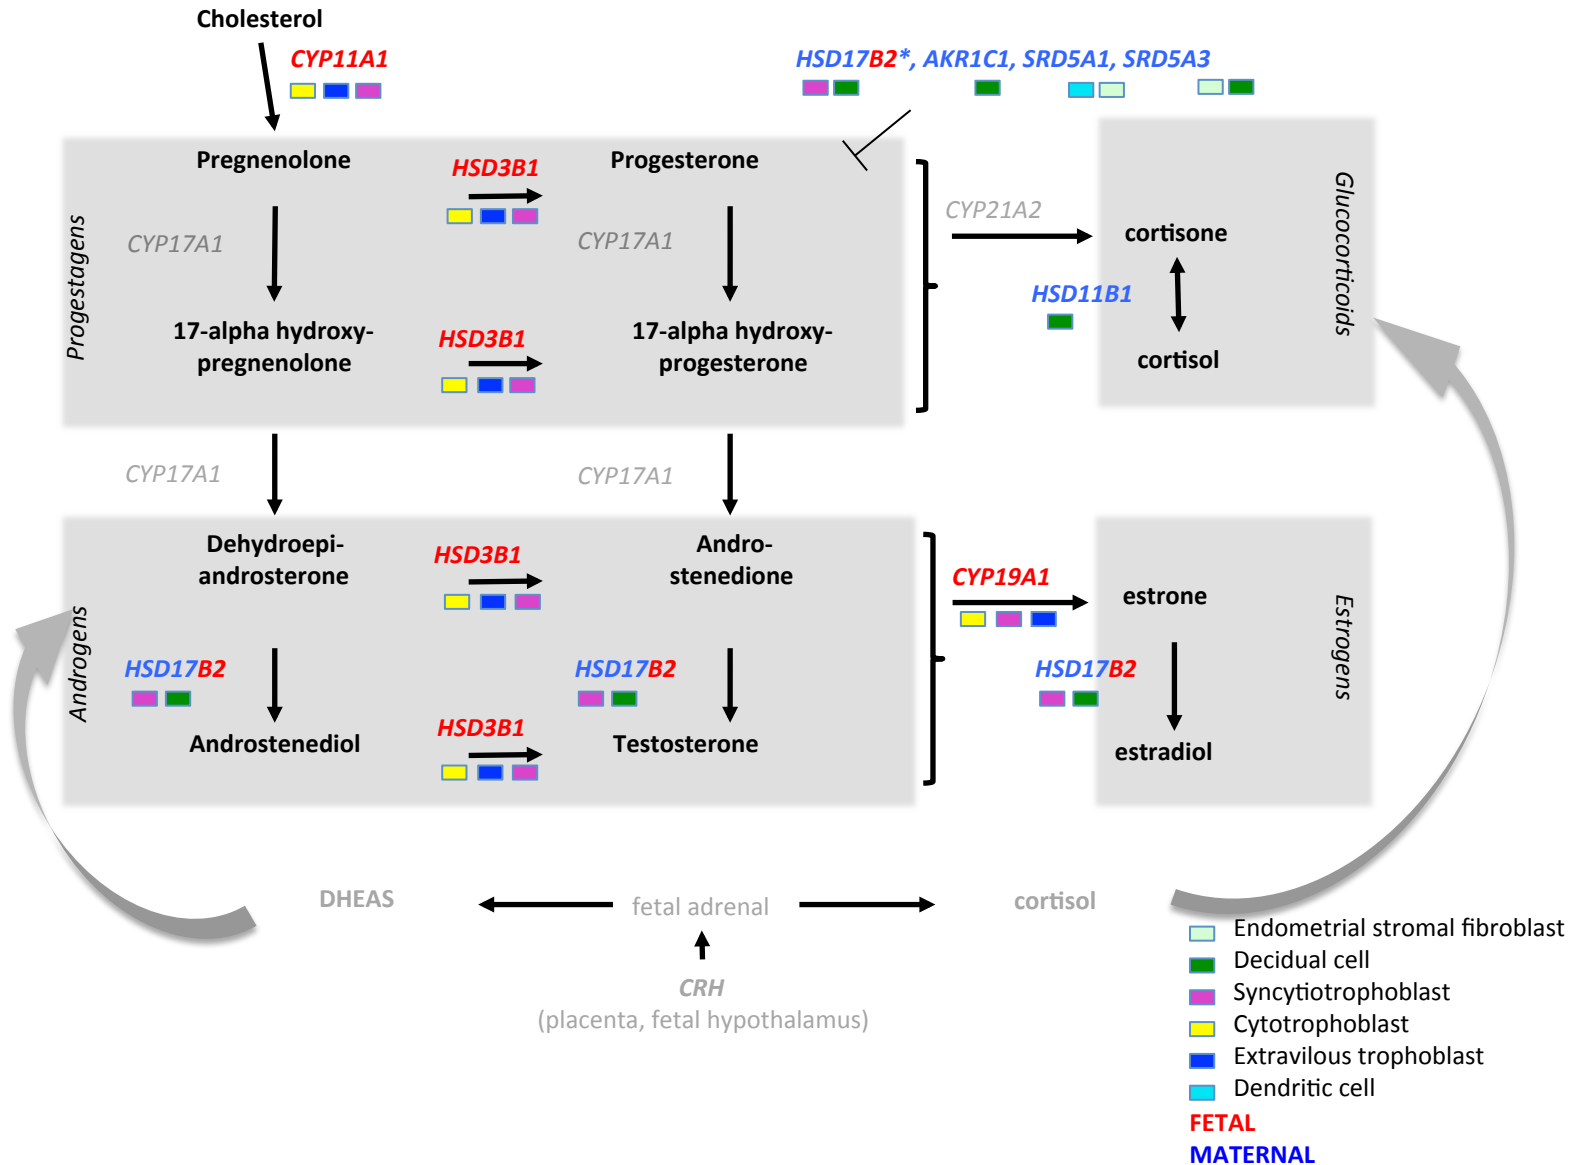

**Figure S6:** Steroid hormone biosynthesis. As in Supplemental Figure S5, the enzyme names in red denote enzymes expressed in trophoblast cells and those in blue are expressed in maternal cells. The colors denote cell-specific expression. The lower part of the figure in grey relates the corticotropin releasing hormone (CRH) expression by placenta and fetal hypothalamus at birth, and its contribution towards the production of androgene DHEAS, to the rest of the biosynthesis. This is denoted grey, as fetal adrenal was not part of the study.
