# Supplementary material for: Single-cell transcriptomics of the human placenta: inferring the cell communication network of the maternal-fetal interface
Source: PubMed Central journal article supplement — Genome Res. 2017 Mar;27(3):349–61. doi: 10.1101/gr.207597.116 (PMC5340963; doi:10.1101/gr.207597.116), 2017-03
Supplement: supp_gr.207597.116_Supplemental_Fig_S7.pdf [file supp_gr.207597.116_Supplemental_Fig_S7.pdf]

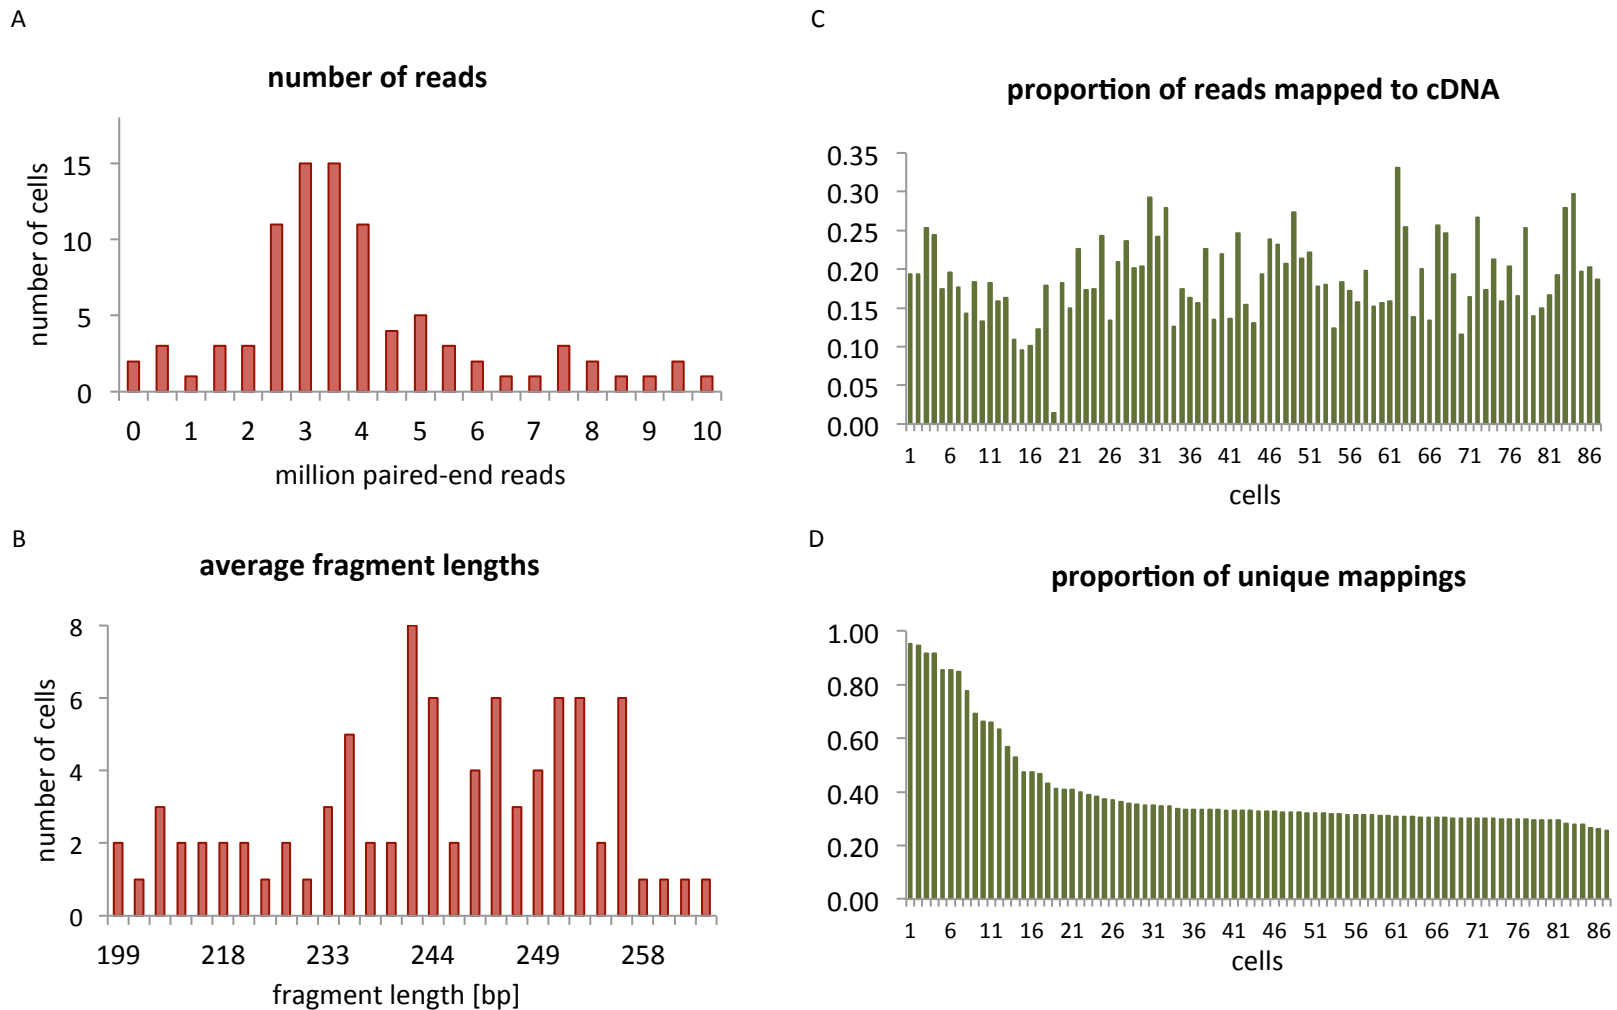

**Figure S7:** Detail of the single cell transcriptomes. A: the distribution of the read depths from different cells. Importantly, the ten smallest transcriptomes are all part of the largest clusters and thus do not affect the clustering. B: distribution of fragment length across cells. C: proportion of total reads mapping to known coding genes. D: average proportion of unique mappings.
