# Supplementary material for: Single-cell transcriptomics of the human placenta: inferring the cell communication network of the maternal-fetal interface
Source: PubMed Central journal article supplement — Genome Res. 2017 Mar;27(3):349–61. doi: 10.1101/gr.207597.116 (PMC5340963; doi:10.1101/gr.207597.116), 2017-03
Supplement: supp_gr.207597.116_Supplemental_Fig_S8.pdf [file supp_gr.207597.116_Supplemental_Fig_S8.pdf]

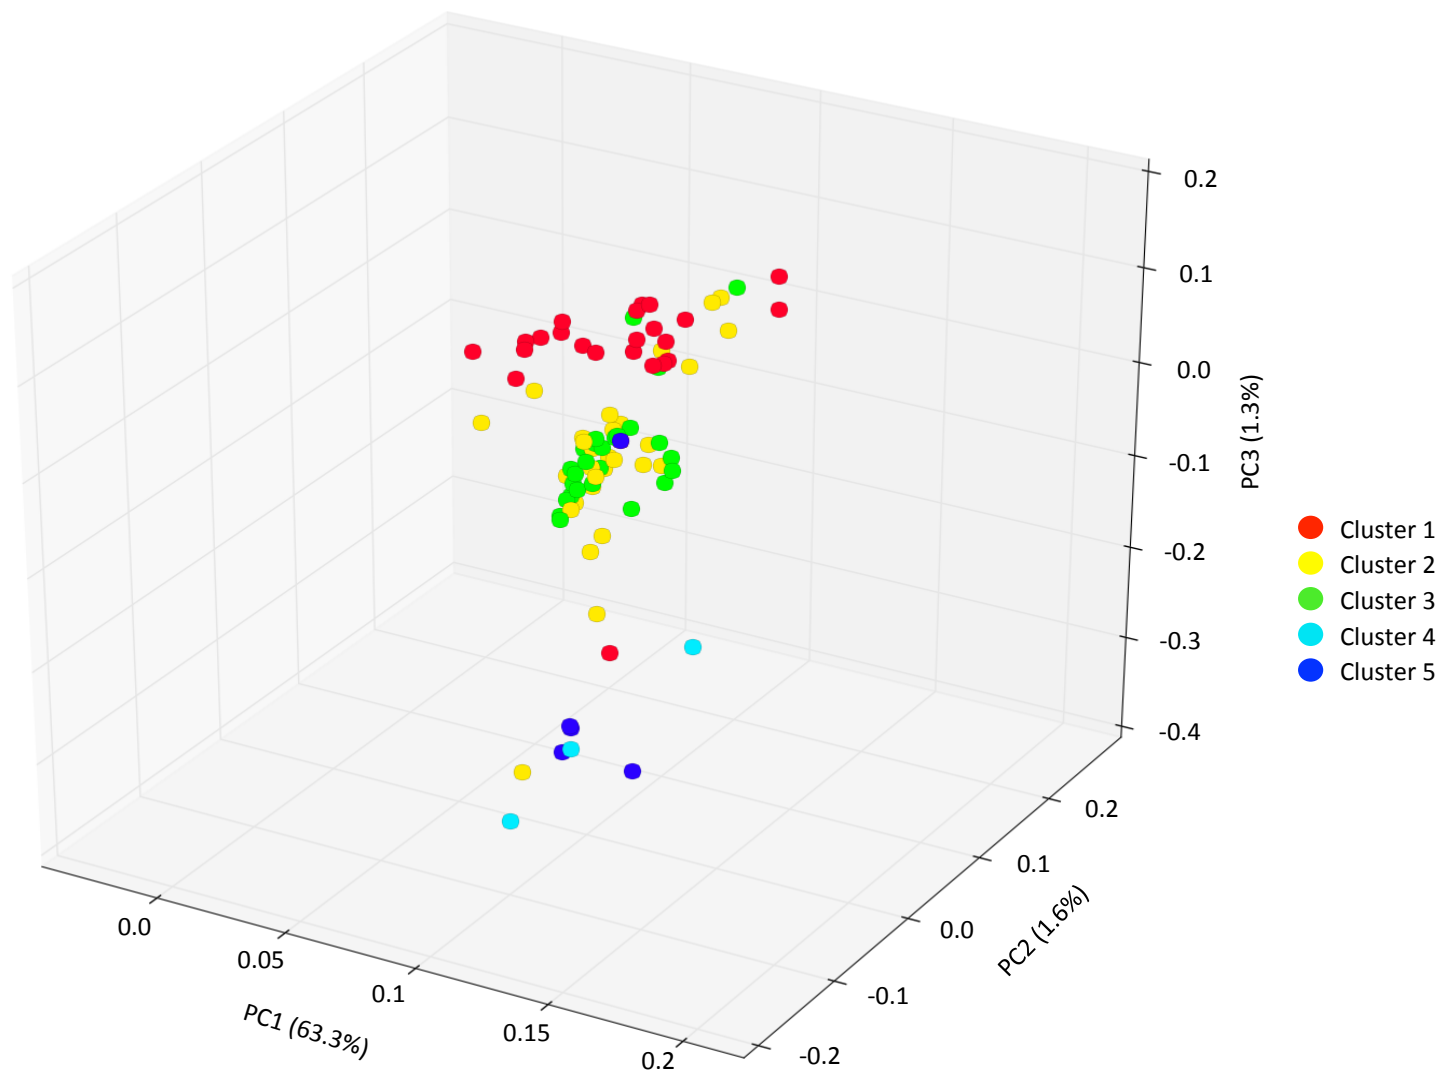

**Figure S8:** The first three principal components of the variation in the single cell dataset with all expressed genes included. The colors denote the results of clustering.
