# Supplementary material for: Single-cell transcriptomics of the human placenta: inferring the cell communication network of the maternal-fetal interface
Source: PubMed Central journal article supplement — Genome Res. 2017 Mar;27(3):349–61. doi: 10.1101/gr.207597.116 (PMC5340963; doi:10.1101/gr.207597.116), 2017-03
Supplement: supp_gr.207597.116_Supplemental_Fig_S9.pdf [file supp_gr.207597.116_Supplemental_Fig_S9.pdf]

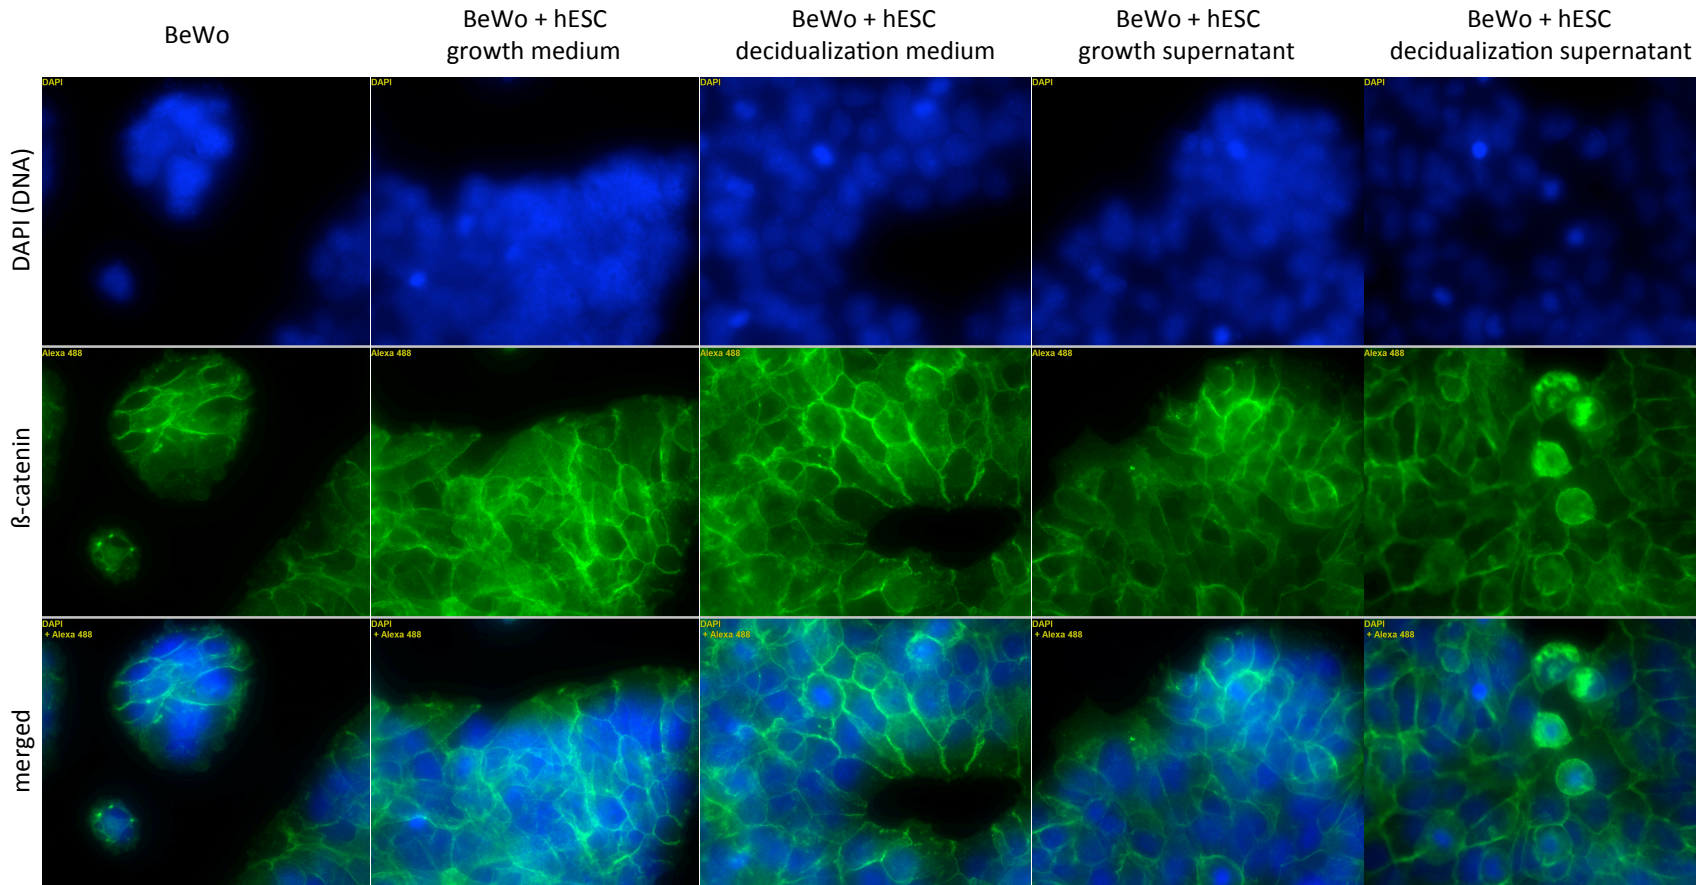

**Figure S9:** Nuclear translocation of beta catenin in BeWo trophoblast cell culture upon conditioning with the supernatant from the decidualized endometrial stromal cells. In addition to results shown in Figure 5, this figure illustrates that neither the fresh growth medium nor fresh decidualization medium, nor conditioned (supernatant) medium of undifferentiated maternal cells can induce the translocation. This demonstrates extended communication upon decidualization of the endometrium.
