# Supplementary material for: Single-cell transcriptomics of the human placenta: inferring the cell communication network of the maternal-fetal interface
Source: PubMed Central journal article supplement — Genome Res. 2017 Mar;27(3):349–61. doi: 10.1101/gr.207597.116 (PMC5340963; doi:10.1101/gr.207597.116), 2017-03
Supplement: supp_gr.207597.116_Supplemental_Fig_S10.pdf [file supp_gr.207597.116_Supplemental_Fig_S10.pdf]

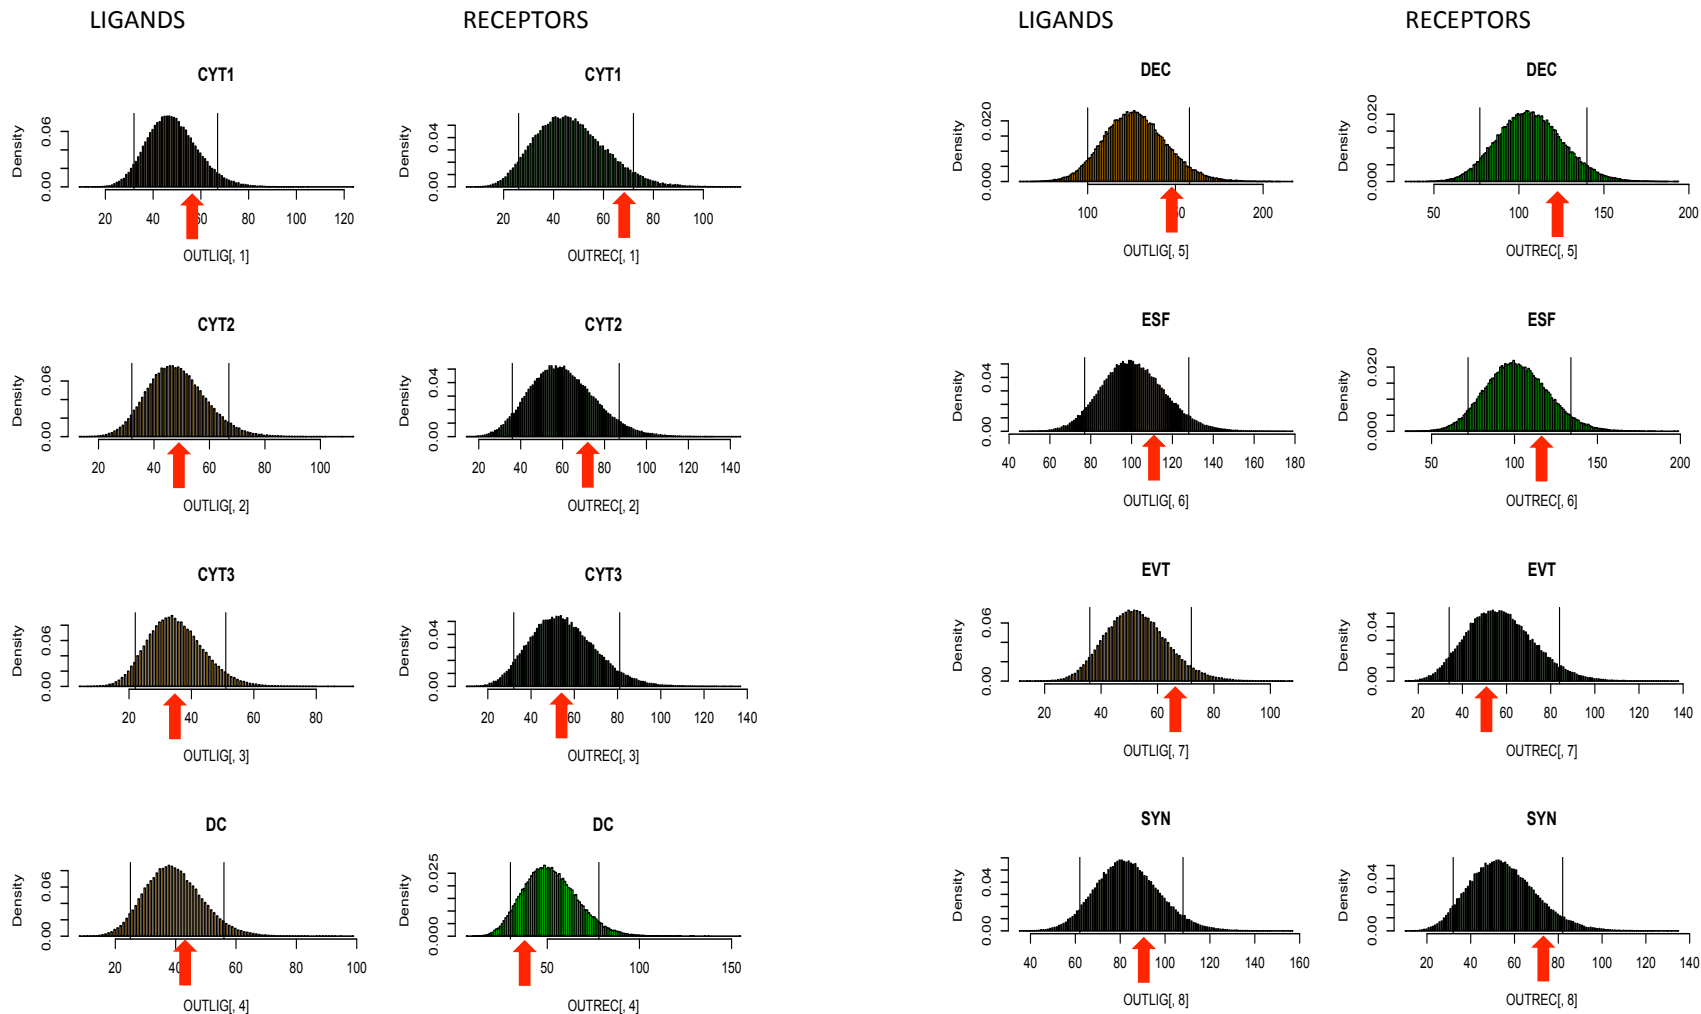

**Figure S10:** The distribution of numbers of putative out- (ligands) and in- (receptors) edges in the interactome, generated by the permutation, where the identities of ligands and receptors are expressed, however their numbers are kept constant. The effects on interaction structures are captured as numbers of realized connections. Red arrows denote the observed numbers, vertical lines denote the .05 and .95 quantiles. Based on 100,000 permutations.
