# Supplementary material for: Single-cell transcriptomics of the human placenta: inferring the cell communication network of the maternal-fetal interface
Source: HighWire-hosted journal article supplement (doi:10.1101/gr.207597.116), 2017-02-07
Supplement: Supplemental_Information.docx [file Supplemental_Information.docx]

***SUPPLEMENTAL INFORMATION***

**T1: Detailed description of the transcriptomes of single clusters.**

***GENE EXPRESSION in fetal trophoblast and maternal cells***

This section complements (and for convenience includes) the diagnostic expression profiles described in the main part of the article with more detailed gene expression description, and interesting biological observations potentially providing a resource for further work. It also includes further related bibliography.

**1. Trophoblast cells**

The markers for general trophoblast cell character are *KRT7*, *KRT8*, *GCM1*, *CYP19A1* and have beenfound to distinguishes the clusters 1, 2, 3 and 5 from cluster 4 and from endometrial stromal cells (Figure 1). In addition to these, further genes are listed in Table 2. The criterion used is >10-fold higher expression in trophoblast cells (including syncytiotrophoblast), than in maternal cells. Interestingly, among these are also two syncytin genes (*ERVW-1, ERVFRD-1*), the retrovirus-derived envelope genes that contribute fusogenic properties responsible for syncytialization of trophoblast cells (Mi et al. 2000). Syncytins are thus not restricted to syncytiotrophoblast, but are well expressed in all trophoblast cells.

*Cytotrophoblast*

Whereas heterogeneity of the intravillous cytotrophoblast cells is relatively high in general, the Cluster1 (N=23 cells) shows some distinctive features. These cells consistently express a lower number of genes (average 6650 as opposed to 8660 for C2 and 8330 for C3). Based on the transcription profile, we have been able to exclude the possibility that these cells are placental exosomes or microvesicles. The upregulated (>5 fold) genes in this cluster relative to the C2 and C3 are enriched in genes for extracellular matrix components: vitronectin, fibronectin and collagens, suggesting extracellular matrix production, mesenchymal cell differentiation and epithelium development. In contrast, the downregulated genes relative to clusters 2 and 3 are associated with positive regulation of cell cycle, transcription and translation (Supplemental Figure S1), likely a signature of terminal differentiation. These cells have similarity to syncytiotrophoblast (upregulation of *PMP22*, *CCDC152*, proteoglycans lumican and decorin, *APOD*, *SEPP1)*.

To exclude alternative explanations of the reduced variety of mRNA types expressed in this cluster, we have considered that these “*cells”* could be the membrane bound vesicles shed from syncytium, which enter maternal circulation (Mincheva-Nilsson and Baranov 2010; Stenqvist et al. 2013; Mincheva-Nilsson and Baranov 2014; Sarker et al. 2014). However, to the extent that the content of such vesicles is present in the form of mRNA rather than protein, the expression in cluster 1 does not correspond to gene profiles reported for placental micro-vesicles. Micro-vesicle markers *CD63* and members of HSP70 (mostly *HSPA8*) are ubiquitously expressed in all trophoblast clusters, while mRNA levels of *CD81 and CD83* are low. The mRNA of the proteins specific for apoptosis-inducing exosomes (e.g., *TNFSF10* and *FASLG*; Stenqvist et al. 2013) is not encountered in these samples. We thus conclude that these cells are more likely cytotrophoblast cells at the end of the differentiation cascade toward syncytiotrophoblast.

*Extravilous trophoblast (EVT)*

Extravillous trophoblast cells interact directly with maternal cells and are thought to be responsible for the invasiveness of human placentation in particular in the first trimester of pregnancy and consequently involved in numerous pathologies, most notably preeclampsia (Menkhorst et al. 2014). Invasiveness is likely most pronounced in the first trimester of pregnancy, and hence it is plausible that the associated genes are not as dominantly expressed in our data, which stems from term placenta.

Interestingly, our cells show EVT-specific high expression of preeclampsia-implicated gene tachikinin (*TAC3)*, the product of which is a neuropeptide likely regulating vasoconstriction (Page et al. 2000). Contrary to the prior reports, expression of *TAC3* is restricted to EVT cells in our data. One of the most highly expressed genes in these cells is furthermore *PRG2*, proteoglycan 2, which has been reported to inhibit proteolysis of IGF-binding proteins by proteinases (Weyer and Glerup 2011). The expression of *DIO2*, the activator of thyroid hormone T3, previously suggested to decline in placenta during pregnancy (Canettieri et al. 2008), is also very high and EVT-specific.

*Syncytiotrophoblast (SYN)*

The general profile of the syncytial sample is consistent with the gene expression pattern known so far for syncytial trophoblast cells from the literature. Surprisingly, we find only intermediate abundance of corticotropin-releasing hormone, *CRH,* transcripts (50 TPM). As this hormone is highly expressed in the full placental transcriptome, and absent in other cells, we suspect that *CRH* mRNA either is sensitive to the process of micro-dissection, or its distribution within the syncytium is heterogeneous.

Among very highly expressed genes in syncytiotrophoblast sample are hemoglobin genes, of alpha, beta and gamma subunits, that is, the adult and fetal hemoglobin. While the hemoglobin expression is very high in total placental tissue, which includes an abundance of vessels, this finding in syncytiotrophoblast is surprising. Reports of elevated hemoglobin in vesicles shed from syncytiotrophoblast exist (Cronqvist et al. 2014), yet the current finding will require future analysis. In the present study, contamination with fetal blood cannot be entirely excluded, although we did not find elevated markers of erythrocytes that would support such explanation. A contamination may have effects both on antigen as well as hemoglobin signature.

2. ***Maternal uterine cells***

*Endometrial stromal fibroblast decidualization (ESF -> DEC)*

Many of the changes occurring during the in-vitro decidualization of endometrial stromal fibroblasts have been reported before (Tabanelli et al. 1992; Brar et al. 2001). Here we focus on the most apparent upregulated pathways, beyond the IGF and immune signaling, which is reported in the main text of the manuscript and in addition separately below.

Characteristic is upregulation of *FOXO1,* a key factor of decidualization (Kajihara et al. 2006; Kajihara et al. 2013), which directly regulates *PRL*, *IGFBP1* and other upregulated decidual genes by physically interacting with HoxA11 and CEBP (Lynch et al. 2009).

One of the most strongly induced genes is the hormone somatostatin (*SST*) (from 0 TPM in ESF to 1,180 TPM in DSC), while its receptor *SSTR1*, is downregulated during decidualization (and not expressed in other sampled cells). This is likely a signature of the role of alternative hormone, neuronostatin, encoded by the *SST* gene and affecting angiogenesis via (upregulated) *GPR107* receptor (Samson et al. 2008; Yosten et al. 2012; Yosten et al. 2015). Multiple mitogenic factors and their receptors increase in expression during decidualization, specifically *FGF7*, *FGF9, PDGFD* and the receptors *FGF1R*, *PDGFRA* and *PDGFRB*. Particularly dominant is furthermore the upregulation of the components of retinoic acid (RA) pathway. The enzymes catalyzing both the biosynthesis of RA from retinol (*RDH10, DHRS3, ALDH1A1*), as well as those catabolizing the excess, toxic retinol (*CYP26B1)* are upregulated. The most upregulated RA receptor is *RARG.* The pro-proliferative effect of retinoic acidis enhanced by *BMP2*, which is similarly upregulated during decidualization, as is its downstream gene *WNT4*, known to be crucial in implantation (Lee et al. 2007; Franco et al. 2011). BMP receptor is also well expressed in syncytiotrophoblast. Further interesting decidual upregulation in the context of growth and support is that of mitochondrial gene *PDK4* thought to decrease glucose metabolism under hypoxia or starvation (Lee et al. 2012).

Notable is the upregulation of the nuclear hormone receptor *NR4A2*, which has been related the to regulation of corticotropin releasing hormone function in inflammation (*CRH*; Murphy et al. 2001; Kageyama et al. 2010; Watanuki et al. 2013). The serum *CRH* levels have been associated with the timing of birth, yet the mechanism is unclear (McLean et al. 1995). In addition, the enzyme that preferably catalyzes the conversion of cortisone to cortisol (*HSD11B1)* thus enhancing glucocorticoid signaling, is strongly upregulated during decidualization and limited to maternal cells (Yang et al. 2016). This enzyme has been suggested to play a role in decidual apoptosis (Chan et al. 2007), or potentially early invasion (Funghi et al. 2016).

A large group of upregulated genes is involved in extracellular matrix structure and remodeling: extracellular matrix proteoglycans, integrins, metalloproteinases and their inhibitors; and a further set in angiogenesis: angiogenin (*ANG*), angiopoetins (*ANGPT1*, *ANGPTL2*), *VEGFA, TM4SF1 (Shih et al. 2009)*. This *l*ikely contributes to regulation of trophoblast invasiveness, as well as in preparation of the tissue for implantation.

Immunological changes during decidualization involve a complex balance of pro-inflammatory signals and their modifiers. Decidualized cells show upregulation of many interferon-induced genes (*IFI6*, *IFI35*), prostaglandin synthetases, complement system genes (*MASP1*, *CD55*) and interleukins. Among the latter, the most notable is the 40-fold upregulation of *IL1R1,* the receptor of pro-inflammatory interleukin *IL1B*. Another implantation-associated interleukin, *IL11*, is also upregulated in decidualized cells (Chen et al. 2002; Paiva et al. 2007). Chemokine *CXCL12* is highly upregulated during decidualization, as is its decoy receptor *ACKR3*. TNF pathways and steroid hormone interactions are discussed separately in the main part of the manuscript.

Similarly as in immune regulation, the overall growth factor expression changes during decidualization indicate simultaneous upregulation of growth-supportive as well as -suppressive signals, suggesting a tightly regulated balance of the provision for, and protection against the invasive embryo.

Interesting is a strong upregulation of the progesterone receptor co-factor *KLF9* in decidua relative to ESF, and *KLF9* is also expressed in extravillous trophoblast. This is notable, because progesterone receptor itself is only minimally expressed in decidua. KLF9 has been associated with birth timing and labor (Zeng et al. 2008; Mendelson 2009) and its expression has been reported in placenta at labor (Sober et al. 2015), in endometrium and myometrium (Pabona et al. 2015).

**SIGNALING PATHWAYS (extended)**

*Prolactin and growth hormones (GH and CSH):* As a consequence of their origin via duplication (Niall et al. 1971; Wallis 1994; GH, Liu et al. 2001; PRL and GH, Forsyth and Wallis 2002; Soares 2004) the growth hormones and chorionic somatotropins (CSH1, CSH2) bind to prolactin- as well as growth hormone receptor (PRLR, GHR). In contrast, prolactin does not bind to the more specific GHR (Xu et al. 2013). CSH-genes are highly expressed in syncytiotrophoblast and EVT, while *GH2* is expressed in syncytiotrophoblast only. *GHR* is not notably expressed in our cells. Prolactin is upregulated in uterine decidual cells, while its receptor (*PRLR)* is moderately expressed in adjacent syncytiotrophoblast and in decidua (<15TPM). The trophoblast and decidua thus appear to send auto- and mutually paracrine signals via the trophoblast growth hormones and the decidual PRL.

*Insulin growth factors (IGF):* IGF1 and IGF2 are prominent regulators of fetal growth. Most of the IGF1 expression is in syncytiotrophoblast, with moderate expression also in maternal decidua. IGF2 is expressed in all trophoblasts, highly in EVT, and is upregulated 3-fold in decidualization. Uterine ESF express several IGF-binding proteins and these further increase during decidualization, whereas only IGFBP3 and-7 are expressed in EVT and syncytiotrophoblast. Trophoblast also express IGFBP-cleaving proteinase *PAPPA*, along with high expression of its inhibitor, proteoglycan PRG2. IGF1 signals primarily via cell-surface receptor IGF1R, and with lower affinity also via the insulin receptor, INSR. IGF1R receptor gene is expressed in trophoblast and in decidua, while INSR is expressed in cytotrophoblast and EVT. IGF2R, which mediates growth inhibitory response, is well expressed in uterus regardless of decidualization (>100 TPM). Collectively, these expression patterns indicate a directionality of the placental IGF signaling towards maternal circulation, and its modulation by the maternal cells via simultaneous expression of both, agonistic and antagonistic receptors. A high abundance of paternally expressed chimeric transcript INS- IGF2 in EVT and syncytiotrophoblast cells is also notable (Monk et al. 2006). The presence of preproinsulin, IGF1 as well as their receptor INSR in trophoblast suggest autocrine signaling, in addition to signaling to the mother.

*Interleukin and TNF signaling:* Not surprisingly the interleukin expression among the collected cells is highest in dendritic cells, and is comprised of *IL1B,* *IL15* and *IL32*. Of these, the potent pro-inflammatory *IL1B* has received most research attention. *IL1B* signal from dendritic cells is matched with high expression of its receptor *IL1R1* in decidua, upregulated >40-fold during decidualization, as well as with expression of the receptor accessory protein *IL1RAP.* While the adjacent fetal extravillous trophoblasts and syncytiotrophoblast express *IL1R1* and *IL1RAP*, extravillous trophoblast (but not cytotrophoblast) also highlyexpresses *IL1R2*, a decoy receptor for both *IL1B* and for *IL1R1.* Anti-inflammatory effects also arise from the maternal side, as dendritic cells express not only *IL1B*, but also strongly express *IL1RN,* the *IL1*-receptor antagonist. Thus while maternal immune cells produce strong pro-inflammatory signals and decidua and trophoblast are capable of perceiving them, maternal immune cells and fetal cells at the same time express strong multifaceted anti-inflammatory signals to balance or to redirect it towards a sustained anti-inflammatory state.

Amongst other interleukins we findstrongupregulation of *IL11* during decidualization, shown to be crucial for decidualization and implantation (Bilinski et al. 1998; Karpovich et al. 2005; Paiva et al. 2009; Dimitriadis et al. 2010). In our data, the expression of *IL11* is limited to decidua. Decidual cells also express low levels of *IL15,* andofthe receptors for *IL11R* and *IL15RA*. Expression of *IL33* by syncytiotrophoblast, along with its receptor *IL1RL1*, is hard to interpret, as different receptor isoforms can act in pro and anti-inflammatory fashion.

Whereas tumor necrosis factor alpha and beta *(TNF*, *LTA*) are not expressed in our sample, dendritic cells express multiple genes of tumor necrosis factor ligand family, *TNFSF*. In addition EVT and syncytiotrophoblast highly express the apoptosis-inducing factor *TNFSF10* (*TRAIL*). This ligand acts by binding to death receptors, of which TNFRSF10B is highly upregulated in decidua, whereas it is only weakly expressed in undifferentiated endometrial stromal fibroblasts. Decidualization is also associated with a 5-fold increase in expression of TNFRSF11B, a decoy receptor for TNFSF11 and TNFSF10*.* These datasuggest active signaling from the EVT and syncytiotrophoblast to decidual cells via TRAIL and TNFRSF10B and modulated by decidual TNFRSF11B expression.

Further downstream targets of TNF-alpha pathway show interesting expression. TNF-alpha-induced proteins *TNFAIP1, 3, 6* and *8* are expressed in maternal and fetal compartments. Most noteworthy is the high expression of *TNFAIP3* in dendritic cells and EVT. This protein likely inhibits the downstream activation of NF-kB pathway by TNF (Song et al. 1996; Heyninck and Beyaert 1999). In contrast, TNFAIP genes associated with tumor invasion are expressed in cytotrophoblast (*TNFAIP8)* and extravillous trophoblast (*TNFAIP2)* (Laliberte et al. 2010; Chen et al. 2011). Overall this data is consistent with a model where the standard pro-inflammatory pathways are activated but their downstream effects experience extensive restructuring specific to the fetal-maternal interface.

***SOME OF THE FINDINGS THAT WARRANT CLOSER EXAMINATION.***

*CGA expression:* One of interesting findings is an apparent lack of beta chain of any glycoprotein hormone across most trophoblasts, concomitant with consistently highly expressed alpha chain mRNA (*CGA*) in all trophoblast cells, and upregulated 700-fold in uterine decidualization. The only cells that appear to express CGB (*CGB8, CGB5*) are syncytiotrophoblasts. Glycoprotein hormones share alpha chain and include chorionic gonadotropin, luteinizing hormone, follicle stimulating hormone and *TFSH,* as well as more recently identified GPH (*GPHA2, GPHB5*; Hsu et al. 2002). Discordance between *CGA* and *CGB* expression was observed previously in perfusion experiments (Takemori et al. 1981), in which discordance increased during pregnancy to reach10-fold higher levels of CGA than the heterodimer (hCG) at term. Finally, the work by Leisser and coauthors (2006) suggests that TNF alpha, which increases at term, is responsible for reduction specifically of the *CGB* expression, a normal process when occurring close to parturition, but potentially indicative of placental malfunction at other time points.

*Syncytin expression pattern*: The broad expression of the syncytin genes (*ERVW-1* and *ERVFRD-1*) in all trophoblast cell types supports the notion that the role of syncytin may be broader than that of cell fusion (Okahara et al. 2004). One candidate is immune suppression, which is crucial in retroviral invasion, and the associated domain is widespread among endogenous retroviruses, including human *Syncytin2* (Mangeney et al. 2007). Further indication that alternative functions may have been key for placental recruitment of envelope proteins is the retention and high expression in placenta of envelope genes, which have lost fusogenicity, such as *ERVMER34-1* (our data; see also Esnault et al. 2013). Mechanistically, the broad expression suggests that syncytins` fusogenic activity is regulated in syncytiotrophoblast specifically. Previously suggested gene for this role, *SLC1A5,* is however expressed broadly in our data, and only weakly in syncytiotrophoblast, contradicting this model for the regulation of fusogenicity.

*MicroRNA expression*

The current pipeline involved poly-A selection and is thus not suited for the comprehensive analysis of microRNA expression in trophoblast cells. However, precursor RNA is expected if mature RNA is expressed, but its detection is conditional on the annotation of the precursor RNA in the reference genome. It is worth noting that many of the precursors of previously reported placental miRNAs (e.g., *miR-106, miR-16, miR-21, miR-126, miR-363* (Mouillet et al. 2010a; Ouyang et al. 2014; Sadovsky et al. 2015) are absent from our annotation and thus would not be detected in our data. Even when present, processing of the precursor RNA to mature RNA may still affect the relative abundance of the latter among the functional microRNA, but this problem is similar to the relationship between the concentration of mRNA of the protein-coding genes, and that of their respective protein.

Overall, we find higher expression of precursor microRNAs in intravillous trophoblast than in extravillous or syncytiotrophoblast. The precursor microRNAs with highest expression are *miR-22*, *miR-100*, *miR-205* and *MIRLET7B* in intra and extravillous trophoblast, and *miR-100* and *miR-503* in syncytiotrophoblast. Precursor of *miR-210* is annotated and appears not to be expressed in our term trophoblast cells. Of the expressed precursors, *miR-205*`s involvement in in placental function is known (Mouillet et al. 2010b), and *miR-22* has been shown to robustly target estrogen receptor alpha (*ESR1*) in vitro and was implicated in tumor growth in breast cancer context (Xiong et al. 2010).

**Literature**

Bilinski P, Roopenian D, Gossler A. 1998. Maternal IL-11Ralpha function is required for normal decidua and fetoplacental development in mice. *Genes & development* **12**: 2234-2243.

Brar AK, Handwerger S, Kessler CA, Aronow BJ. 2001. Gene induction and categorical reprogramming during in vitro human endometrial fibroblast decidualization. *Physiological genomics* **7**: 135-148.

Chan J, Rabbitt EH, Innes BA, Bulmer JN, Stewart PM, Kilby MD, Hewison M. 2007. Glucocorticoid-induced apoptosis in human decidua: a novel role for 11 beta-hydroxysteroid dehydrogenase in late gestation. *Journal of Endocrinology* **195**: 7-15.

Chen HF, Lin CY, Chao KH, Wu MY, Yang YS, Ho HN. 2002. Defective production of interleukin-11 by decidua and chorionic villi in human anembryonic pregnancy. *The Journal of clinical endocrinology and metabolism* **87**: 2320-2328.

Chen LC, Chen CC, Liang Y, Tsang NM, Chang YS, Hsueh C. 2011. A novel role for TNFAIP2: its correlation with invasion and metastasis in nasopharyngeal carcinoma. *Mod Pathol* **24**: 175-184.

Cronqvist T, Salje K, Familari M, Guller S, Schneider H, Gardiner C, Sargent IL, Redman CW, Morgelin M, Akerstrom B et al. 2014. Syncytiotrophoblast vesicles show altered micro-RNA and haemoglobin content after ex-vivo perfusion of placentas with haemoglobin to mimic preeclampsia. *PloS one* **9**: e90020.

Dimitriadis E, Menkhorst E, Salamonsen LA, Paiva P. 2010. Review: LIF and IL11 in trophoblast-endometrial interactions during the establishment of pregnancy. *Placenta* **31 Suppl**: S99-104.

Esnault C, Cornelis G, Heidmann O, Heidmann T. 2013. Differential evolutionary fate of an ancestral primate endogenous retrovirus envelope gene, the EnvV syncytin, captured for a function in placentation. *PLoS genetics* **9**: e1003400.

Forsyth IA, Wallis M. 2002. Growth hormone and prolactin--molecular and functional evolution. *J Mammary Gland Biol Neoplasia* **7**: 291-312.

Franco HL, Dai D, Lee KY, Rubel CA, Roop D, Boerboom D, Jeong JW, Lydon JP, Bagchi IC, Bagchi MK et al. 2011. WNT4 is a key regulator of normal postnatal uterine development and progesterone signaling during embryo implantation and decidualization in the mouse. *FASEB J* **25**: 1176-1187.

Funghi L, Damiani F, Yen CF, Lee CL, Lombardi A, Schatz F, Lockwood CJ, Marcolongo P, Petraglia F, Arcuri F. 2016. Expression and regulation of 11beta-hydroxysteroid dehydrogenase type 1 in first trimester human decidua cells: Implication in preeclampsia. *Mol Cell Endocrinol* **437**: 163-170.

Heyninck K, Beyaert R. 1999. The cytokine-inducible zinc finger protein A20 inhibits IL-1-induced NF-kappaB activation at the level of TRAF6. *FEBS letters* **442**: 147-150.

Hsu SY, Nakabayashi K, Bhalla A. 2002. Evolution of glycoprotein hormone subunit genes in bilateral metazoa: identification of two novel human glycoprotein hormone subunit family genes, GPA2 and GPB5. *Mol Endocrinol* **16**: 1538-1551.

Kageyama K, Kagaya S, Takayasu S, Hanada K, Iwasaki Y, Suda T. 2010. Cytokines induce NF-kappaB, Nurr1 and corticotropin-releasing factor gene transcription in hypothalamic 4B cells. *Neuroimmunomodulation* **17**: 305-313.

Kajihara T, Brosens JJ, Ishihara O. 2013. The role of FOXO1 in the decidual transformation of the endometrium and early pregnancy. *Med Mol Morphol* **46**: 61-68.

Kajihara T, Jones M, Fusi L, Takano M, Feroze-Zaidi F, Pirianov G, Mehmet H, Ishihara O, Higham JM, Lam EW et al. 2006. Differential expression of FOXO1 and FOXO3a confers resistance to oxidative cell death upon endometrial decidualization. *Mol Endocrinol* **20**: 2444-2455.

Karpovich N, Klemmt P, Hwang JH, McVeigh JE, Heath JK, Barlow DH, Mardon HJ. 2005. The production of interleukin-11 and decidualization are compromised in endometrial stromal cells derived from patients with infertility. *The Journal of clinical endocrinology and metabolism* **90**: 1607-1612.

Laliberte B, Wilson AM, Nafisi H, Mao H, Zhou YY, Daigle M, Albert PR. 2010. TNFAIP8: a new effector for Galpha(i) coupling to reduce cell death and induce cell transformation. *J Cell Physiol* **225**: 865-874.

Lee JH, Kim EJ, Kim DK, Lee JM, Park SB, Lee IK, Harris RA, Lee MO, Choi HS. 2012. Hypoxia induces PDK4 gene expression through induction of the orphan nuclear receptor ERRgamma. *PloS one* **7**: e46324.

Lee KY, Jeong JW, Wang J, Ma L, Martin JF, Tsai SY, Lydon JP, DeMayo FJ. 2007. Bmp2 is critical for the murine uterine decidual response. *Molecular and cellular biology* **27**: 5468-5478.

Leisser C, Saleh L, Haider S, Husslein H, Sonderegger S, Knofler M. 2006. Tumour necrosis factor-alpha impairs chorionic gonadotrophin beta-subunit expression and cell fusion of human villous cytotrophoblast. *Mol Hum Reprod* **12**: 601-609.

Liu JC, Makova KD, Adkins RM, Gibson S, Li WH. 2001. Episodic evolution of growth hormone in primates and emergence of the species specificity of human growth hormone receptor. *Molecular biology and evolution* **18**: 945-953.

Lynch VJ, Brayer K, Gellersen B, Wagner GP. 2009. HoxA-11 and FOXO1A cooperate to regulate decidual prolactin expression: towards inferring the core transcriptional regulators of decidual genes. *PloS one* **4**: e6845.

Mangeney M, Renard M, Schlecht-Louf G, Bouallaga I, Heidmann O, Letzelter C, Richaud A, Ducos B, Heidmann T. 2007. Placental syncytins: Genetic disjunction between the fusogenic and immunosuppressive activity of retroviral envelope proteins. *Proceedings of the National Academy of Sciences of the United States of America* **104**: 20534-20539.

McLean M, Bisits A, Davies J, Woods R, Lowry P, Smith R. 1995. A placental clock controlling the length of human pregnancy. *Nat Med* **1**: 460-463.

Mendelson CR. 2009. Minireview: fetal-maternal hormonal signaling in pregnancy and labor. *Mol Endocrinol* **23**: 947-954.

Menkhorst E, Winship A, Van Sinderen M, Dimitriadis E. 2014. Human extravillous trophoblast invasion: intrinsic and extrinsic regulation. *Reproduction, fertility, and development* doi:10.1071/RD14208.

Mi S, Lee X, Li X, Veldman GM, Finnerty H, Racie L, LaVallie E, Tang XY, Edouard P, Howes S et al. 2000. Syncytin is a captive retroviral envelope protein involved in human placental morphogenesis. *Nature* **403**: 785-789.

Mincheva-Nilsson L, Baranov V. 2010. The role of placental exosomes in reproduction. *Am J Reprod Immunol* **63**: 520-533.

Mincheva-Nilsson L, Baranov V. 2014. Placenta-derived exosomes and syncytiotrophoblast microparticles and their role in human reproduction: immune modulation for pregnancy success. *Am J Reprod Immunol* **72**: 440-457.

Monk D, Sanches R, Arnaud P, Apostolidou S, Hills FA, Abu-Amero S, Murrell A, Friess H, Reik W, Stanier P et al. 2006. Imprinting of IGF2 P0 transcript and novel alternatively spliced INS-IGF2 isoforms show differences between mouse and human. *Human molecular genetics* **15**: 1259-1269.

Mouillet JF, Chu T, Hubel CA, Nelson DM, Parks WT, Sadovsky Y. 2010a. The levels of hypoxia-regulated microRNAs in plasma of pregnant women with fetal growth restriction. *Placenta* **31**: 781-784.

Mouillet JF, Chu T, Nelson DM, Mishima T, Sadovsky Y. 2010b. MiR-205 silences MED1 in hypoxic primary human trophoblasts. *FASEB J* **24**: 2030-2039.

Murphy EP, McEvoy A, Conneely OM, Bresnihan B, FitzGerald O. 2001. Involvement of the nuclear orphan receptor NURR1 in the regulation of corticotropin-releasing hormone expression and actions in human inflammatory arthritis. *Arthritis Rheum* **44**: 782-793.

Niall HD, Hogan ML, Sauer R, Rosenblum IY, Greenwood FC. 1971. Sequences of pituitary and placental lactogenic and growth hormones: evolution from a primordial peptide by gene reduplication. *Proceedings of the National Academy of Sciences of the United States of America* **68**: 866-870.

Okahara G, Matsubara S, Oda T, Sugimoto J, Jinno Y, Kanaya F. 2004. Expression analyses of human endogenous retroviruses (HERVs): tissue-specific and developmental stage-dependent expression of HERVs. *Genomics* **84**: 982-990.

Ouyang Y, Mouillet JF, Coyne CB, Sadovsky Y. 2014. Review: placenta-specific microRNAs in exosomes - good things come in nano-packages. *Placenta* **35 Suppl**: S69-73.

Pabona JM, Zhang D, Ginsburg DS, Simmen FA, Simmen RC. 2015. Prolonged pregnancy in women is associated with attenuated myometrial expression of progesterone receptor co-regulator Kruppel-like Factor 9. *The Journal of clinical endocrinology and metabolism* **100**: 166-174.

Page NM, Woods RJ, Gardiner SM, Lomthaisong K, Gladwell RT, Butlin DJ, Manyonda IT, Lowry PJ. 2000. Excessive placental secretion of neurokinin B during the third trimester causes pre-eclampsia. *Nature* **405**: 797-800.

Paiva P, Salamonsen LA, Manuelpillai U, Dimitriadis E. 2009. Interleukin 11 inhibits human trophoblast invasion indicating a likely role in the decidual restraint of trophoblast invasion during placentation. *Biology of reproduction* **80**: 302-310.

Paiva P, Salamonsen LA, Manuelpillai U, Walker C, Tapia A, Wallace EM, Dimitriadis E. 2007. Interleukin-11 promotes migration, but not proliferation, of human trophoblast cells, implying a role in placentation. *Endocrinology* **148**: 5566-5572.

Sadovsky Y, Mouillet JF, Ouyang Y, Bayer A, Coyne CB. 2015. The Function of TrophomiRs and Other MicroRNAs in the Human Placenta. *Cold Spring Harb Perspect Med* **5**: a023036.

Samson WK, Zhang JV, Avsian-Kretchmer O, Cui K, Yosten GL, Klein C, Lyu RM, Wang YX, Chen XQ, Yang J et al. 2008. Neuronostatin encoded by the somatostatin gene regulates neuronal, cardiovascular, and metabolic functions. *The Journal of biological chemistry* **283**: 31949-31959.

Sarker S, Scholz-Romero K, Perez A, Illanes SE, Mitchell MD, Rice GE, Salomon C. 2014. Placenta-derived exosomes continuously increase in maternal circulation over the first trimester of pregnancy. *J Transl Med* **12**: 204.

Shih SC, Zukauskas A, Li D, Liu G, Ang LH, Nagy JA, Brown LF, Dvorak HF. 2009. The L6 protein TM4SF1 is critical for endothelial cell function and tumor angiogenesis. *Cancer research* **69**: 3272-3277.

Soares MJ. 2004. The prolactin and growth hormone families: pregnancy-specific hormones/cytokines at the maternal-fetal interface. *Reprod Biol Endocrinol* **2**: 51.

Sober S, Reiman M, Kikas T, Rull K, Inno R, Vaas P, Teesalu P, Marti JM, Mattila P, Laan M. 2015. Extensive shift in placental transcriptome profile in preeclampsia and placental origin of adverse pregnancy outcomes. *Sci Rep* **5**: 13336.

Song HY, Rothe M, Goeddel DV. 1996. The tumor necrosis factor-inducible zinc finger protein A20 interacts with TRAF1/TRAF2 and inhibits NF-kappaB activation. *Proceedings of the National Academy of Sciences of the United States of America* **93**: 6721-6725.

Stenqvist AC, Nagaeva O, Baranov V, Mincheva-Nilsson L. 2013. Exosomes secreted by human placenta carry functional Fas ligand and TRAIL molecules and convey apoptosis in activated immune cells, suggesting exosome-mediated immune privilege of the fetus. *Journal of immunology* **191**: 5515-5523.

Tabanelli S, Tang BQ, Gurpide E. 1992. Invitro Decidualization of Human Endometrial Stromal Cells. *J Steroid Biochem* **42**: 337-344.

Takemori M, Nishimura R, Ashitaka Y, Tojo S. 1981. Release of human chorionic gonadotropin (hCG) and its alpha-subunit (hCG-alpha) from perifused human placenta. *Endocrinol Jpn* **28**: 757-768.

Wallis M. 1994. Variable evolutionary rates in the molecular evolution of mammalian growth hormones. *Journal of molecular evolution* **38**: 619-627.

Watanuki Y, Takayasu S, Kageyama K, Iwasaki Y, Sakihara S, Terui K, Nigawara T, Suda T. 2013. Involvement of Nurr-1/Nur77 in corticotropin-releasing factor/urocortin1-induced tyrosinase-related protein 1 gene transcription in human melanoma HMV-II cells. *Mol Cell Endocrinol* **370**: 42-51.

Weyer K, Glerup S. 2011. Placental regulation of peptide hormone and growth factor activity by proMBP. *Biology of reproduction* **84**: 1077-1086.

Xiong J, Yu D, Wei N, Fu H, Cai T, Huang Y, Wu C, Zheng X, Du Q, Lin D et al. 2010. An estrogen receptor alpha suppressor, microRNA-22, is downregulated in estrogen receptor alpha-positive human breast cancer cell lines and clinical samples. *FEBS J* **277**: 1684-1694.

Xu J, Sun D, Jiang J, Deng L, Zhang Y, Yu H, Bahl D, Langenheim JF, Chen WY, Fuchs SY et al. 2013. The role of prolactin receptor in GH signaling in breast cancer cells. *Mol Endocrinol* **27**: 266-279.

Yang QL, Wang WS, Liu C, Wang Y, Sun K. 2016. Compartmentalized localization of 11 beta-HSD 1 and 2 at the feto-maternal interface in the first trimester of human pregnancy. *Placenta* **46**: 63-71.

Yosten GL, Elrick MM, Salvatori A, Stein LM, Kolar GR, Ren J, Corbett JA, Samson WK. 2015. Understanding peptide biology: The discovery and characterization of the novel hormone, neuronostatin. *Peptides* **72**: 192-195.

Yosten GL, Redlinger LJ, Samson WK. 2012. Evidence for an interaction of neuronostatin with the orphan G protein-coupled receptor, GPR107. *American journal of physiology Regulatory, integrative and comparative physiology* **303**: R941-949.

Zeng Z, Velarde MC, Simmen FA, Simmen RC. 2008. Delayed parturition and altered myometrial progesterone receptor isoform A expression in mice null for Kruppel-like factor 9. *Biology of reproduction* **78**: 1029-1037.
