# Supplementary material for: Single-cell transcriptomics of the human placenta: inferring the cell communication network of the maternal-fetal interface
Source: HighWire-hosted journal article supplement (doi:10.1101/gr.207597.116), 2017-02-07
Supplement: Supplemental_Methods.docx [file Supplemental_Methods.docx]

**SUPPLEMENTAL METHODS**

This section complements (and for convenience includes) the short description of methods in the main manuscript.

***Generating transcriptomes***

*Single cell*

Fresh, term placental tissue from normal pregnancies was obtained following elective cesarean section and minced finely. Tissue underwent serial trypsin and collagenase digests as previously described (Troja et al. 2014) and the resulting cell suspension was layered on a continuous Percoll gradient. Cells were collected from the 20-60% fractions. Collected cells were filtered through a 40µm cell filter and underwent Trypan blue exclusion to assess viability. Cell suspension at 3x105 cell/ml was submitted to Auto Prep System (Fluidigm) and handled according to the manufacturer`s instruction. Briefly, cells were loaded onto a primed C1 Single-Cell Auto Prep Integrated Fluidic Chip for mRNA-seq (selected size range 17-25 μm). After the capture step, the chip was visually scored and chambers with single cells recorded. Cells were lysed on chip using manufacturer`s reagent, following which we performed reverse transcription using Clontech SMARTer Kit (mRNA-se:RT& Amp (1771x)). The resulting cDNA was transferred to a 96 well plate and diluted with 5µl C1 DNA Dilution Reagent. cDNAs were quantified using Quant-iT PicoGreen dsDNA Assay Kit (Life Technologies) and Agilent High Sensitivity DNA Kit (Agilent Technologies). We used Nextera XT DNA Library Preparation Kit (Illumina) for library preparation; a total of 125 pg cDNA was tagmented at 55 °C for 20 min. Libraries were pooled and purified on AMPure bead-based magnetic separation. A final quality control was performed with Qubit dsDNA HS Assay Kit (Life Technologies) and Agilent High Sensitivity DNA Kit. For sequencing we required that the majority of cDNA fragments be between 375–425 bp. Single-cell libraries were subsequently subjected to paired-end 75 bp RNA sequencing on a HiSeq 2500 (Illumina Inc.) resulting in a median of 3.65 Million reads per cell (distribution in Supplemental Fig. S7A).

*Placental tissue-level transcriptome*

Two human placentas were collected at term cesarean section without labor, at 39 weeks and 1day, respectively 39 weeks and 2 days gestational age (IRB protocol: CCHMC IRB 2013–2243). These samples are of the same type, but separate from the samples used for single cell transcriptomes. Collected tissue was flash frozen and kept at -80˚C until RNA extraction. Total RNA was isolated using TRIzol. All samples passed initial quality testing using Bioanalyzer 2100 (Agilent), assuring RIN values > 9. Libraries were prepared from one microgram of total RNA with TRUseq Stranded mRNA HT kit (Illumina Inc.). The libraries were subjected to paired-end 50 bp RNA sequencing on a HiSeq 2500 (Illumina Inc.), at the depth of 30 Million reads per sample.

*Laser microdissection*

One cubic cmcubes of placental tissue were dissected from fresh, term human placenta and incubated in 30% sucrose overnight at 4°C and then embedded in OCT and frozen at -80°C. Blocks of frozen tissue were sectioned on a cryostat at 15μ thickness and placed on RNase-free PEN membrane coated slides (Leica #11505189). These slides were lightly stained with Haematoxylin and Eosin to enable visualization of cells for laser microdissection of syncytiotrophoblast. With Leica LMD 7000 Laser Microdissection system, syncytial trophoblast cells were collected directly in the lysis buffer (Buffer RLT plus) from Qiagen RNasy Plus Micro kit and RNA was extracted subsequently. Two samples were collected from the same placenta. From total RNA we generated the amplified cDNA using Ovation RNA Amplification System (Ribo-SPIA technology, NuGen). Libraries were sequenced using Illumina HiSeq2500, to obtain a minimum of 30 million 75bp paired-end reads. Reads were aligned using Bowtie, counted and normalized using RNA-eXpress as described below.

*Primary human endometrial stromal fibroblast culture*

Two primary human endometrial stromal fibroblast lines (HsESC_217S and HsESC_218S) were obtained from the Hugh Taylor/Clare Flannery labs in the Department of Obstetrics, Gynecology, and Reproductive Sciences at Yale University. HsESC_217S and HsESC_218S were derived from two separate patients each undergoing a polypectomy surgical procedure on days 3 and 9 of the menstrual cycle, respectively. The cells were grown in DMEM supplemented with 10% charcoal-stripped fetal bovine serum (Gemini), 0.1% ITS (Corning), and 1% antibiotic/antimycotic (ABAM; GIBCO). To induce decidualization, the cells were treated with 0.5mM 8-Br-cAMP (Sigma) and 0.5mM of the progesterone analog, medroxy-progesterone acetate (MPA), for 48 hours in DMEM supplemented with 2% fetal bovine serum (Gemini). Cells were examined for markers of normal decidualization (*PRL*, *WNT4*).

Total RNA was extracted using the RNeasy Mini kit (Qiagen) followed by on-column DNase I treatment. Total RNA quality was assayed with the Bioanalyzer 2100 (Agilent). RIN values for all samples were above 9.5. RNA samples were sequenced using the Illumina HiSeq2500. A minimum of 36 million paired end reads were obtained for each sample. Reads were aligned to the human cDNA builds at Ensembl with TopHat2. Reads mapping to each gene feature were counted with HTSeq, and the counts were normalized as transcripts per million (TPM). Two samples corresponding to two technical repeats of each of the two primary cell cultures were processed independently; the expression values used here are the averages for every gene of the four transcriptomes.

*Immunocytochemistry*

The placental cytotrophoblast cell line BeWo (ATCC CCL98) was grown on the 8-well chamber slides (LAB-TEK), using the standard medium consisting of F12 (GIBCO), supplemented with 10% FBS and 1% antibiotic/antimycotic (GIBCO). Cells were grown at 37˚C and 5% CO2. In parallel, human endometrial stromal fibroblasts (T HESC, obtained from Gill lab, Yale University, corresponding to ATCC CRL-4003) were cultured and decidualized as described above for ESF primary cells. To test the effect of signaling from decidual to trophoblast cells, the supernatant from ESF culture before decidualization and 60 h after the start of decidualization were transferred onto placental cells for 30 min, before fixation. As controls, BeWo trophoblast cells were also treated with fresh ESF growth and decidualization media. After 30min incubation with transferred media at 37˚C, the cells were fixed in 100% Methanol, permeabilized in 0.1% PBS Triton X-100 solution, blocked by blocking buffer (Abcam), and incubated over night at 4˚C with the anti-beta catenin primary antibody at 1µg/ml (Abcam, ab16051). Secondary fluorescent antibody (Abcam, ab150077) was used for subsequent incubation at RT for 1h. DAPI (Thermofisher) was used for nuclear staining. In addition, the non-decidualized and decidualized HESC were also fixed and stained for beta-catenin using the same protocol.

***Analysis***

*Single cell transcriptomes*

The reads were aligned using Bowtie to human assembly (hg19; see Supplemental Fig. S7 for the distribution of fragment lengths and mapped reads), using large index and recording unlimited alignments. eXpress (<http://www.rnaexpress.org>) (Roberts and Pachter 2013a; Roberts and Pachter 2013b) was used subsequently for abundance assessment and normalization of the expression to transcripts per million (TPM, see below). Importantly, eXpress software has been shown to be particularly efficient in resolving multiple mappings, often problematic with short reads and limited depth of single-cell transcriptomes. It uses estimation of known parameters determining sequencing results based on available data, and probabilistic models to estimate the true number of fragments generated from the target sequence, given alignments generated in the previous step.

The transcriptomes from the single cell pipeline were hierarchically clustered and subsequently analyzed for specific marker expression using AltAnalyze (http://www.altanalyze.org; Emig et al. 2010). The default settings were used for the clustering, and downstream analyses included the characterization of the cluster-specific gene expression with GO-terms (using GO Elite from Gladstone Institutes: <http://www.genmapp.org/go_elite/>). The first three principal components on complete data explain 66 % of variation (Supplemental Fig. S8). Plots in Figure 1 show the expression levels of the 300 genes identified by the module Markerfinder in Altanalyze to have >2 fold expression difference between the clusters. Together with literature-reported marker genes, this characterization enabled us to determine the cell-type identities of the clusters. We detected no overwhelming batch effect in our data, as seen by the fact that the cells do not cluster by batch when combined; rather the cells from both batches are represented in all clusters (Figure 1A; the cells of the second batch are characterized by the roman II in front of the ID on X-axis). This enables us to combine the two dataset in common analyses. The clustering was performed on the single cell pipeline-derived cells alone, to exclusion of the cells collected via other methods. Note that referring to genes as marker genes is specific to this particular set of cells. As a consequence, these markers may not be unique to the specific cells in a different context. Another consequence of limited context is that known trophoblast markers shared between sampled cells do not contribute to the set contrasting the clusters, and may thus not appear in the marker list.

*Combining transcriptomes to build cell-communication plots*

To combine single cell transcriptomes and transcriptomes collected from laser microdissection and from the cell culture, we used the same assembly, and calculated expression on TPM (transcripts per million) scale. To combine the transcriptomes for the cell-signaling plots, we considered only reads which mapped onto the set of 22,632 genes, and recalculated the expression levels relative to the total reads mapping to this same set of genes in all transcriptomes. TPM scale is linearly related to FPKM, however better suited for comparisons across references (Wagner et al. 2012). The expression values were then averaged within each single cell cluster, to arrive at the data used in constructing cell-cell interactomes (Supplemental Table S1). The selection of ligands-receptor relationships included in this study is based on the paired lists in existing databases (<http://www.guidetopharmacology.org>; <http://dip.doe-mbi.ucla.edu/dip/DLRP.cgi>). In cases where the ligand is not a peptide, we inferred the relationship by using the presence of at least the enzyme of the terminal step in ligand biosynthesis (but more detail is provided for steroids and prostaglandins). We next determined the expression of ligands and receptors above selected cut-off threshold of 30TPM in any of the cell types and constructed lists of potentially communicating cell pairs. Note that the cut-off value used here is arbitrary, and was chosen to provide clear visualization and avoid potential noise. The values lower than 30TPM are certainly biologically relevant, and are discussed in the main text. The lists of expressed ligands and receptors, and the connections between ligands and receptors of adjacent cells were subsequently visualized in interaction plots with arrows connecting the ligands and corresponding receptors using the functions of the freely available R package Circlize (Gu et al. 2014; https://cran.r-project.org/web/packages/circlize/).
