# Supplementary material for: Single-cell transcriptomics of the human placenta: inferring the cell communication network of the maternal-fetal interface
Source: HighWire-hosted journal article supplement (doi:10.1101/gr.207597.116), 2017-02-07
Supplement: Supplemental_Tables.xlsx [file Supplemental_Tables.xlsx]

## Sheet: S1
Table S1: Average transcriptomes used in interaction analyses (in TPM, calculated relative to the total of coding genes). These levels are calculated relative to the total of expression of this gene set only for the purposes of interaction analysis in this study. For a total data set (with TPM values), see GEO
Gene	CYT1	SE	CYT2	SE	CYT3	SE	DC	SE	EVT	SE	SYN	SE	ESF	SE	DEC	SE
5S_rRNA	0	0	0	0	3.33906	3.26236	0	0	1.51314	1.51314	33.9484	33.9484	0	0	0	0
7SK	81.5976	47.6259	100.466	65.979	68.3613	31.6541	5.18576	5.18576	8.99522	8.99522	433.801	262.398	0	0	0	0
A1BG	0	0	10.4797	10.4126	0.0149439	0.0149439	58.8374	56.2206	0	0	0	0	1.21939	0.100902	3.62144	0.0437898
A1CF	0	0	0	0	0	0	0	0	0	0	0	0	0	0	0	0
A2M	0	0	0	0	0	0	75.2207	37.6879	0	0	151.914	24.7979	1.18541	0.367009	2.7816	0.649038
A2M-AS1	0	0	0	0	0	0	0.551923	0.551923	0	0	0.223134	0.07049	0	0	0	0
A2ML1	0	0	3.31722	3.31722	0.809908	0.745138	0	0	0	0	0	0	0	0	0	0
A2MP1	0	0	0	0	0	0	0	0	0	0	0	0	0	0	0	0
A3GALT2	0	0	0	0	0	0	0	0	0	0	0	0	0.0228422	0.00961168	0	0
A4GALT	10.308	10.308	25.7453	14.3317	3.468	2.83882	0.000976265	0.000976265	9.33777	9.33777	3.70513	3.70513	3.91938	0.574251	15.436	1.31731
A4GNT	0	0	0	0	0	0	0	0	0	0	0.032556	0.032556	0	0	0	0
AA06	0	0	0	0	0	0	0	0	0	0	0	0	0	0	0	0
AAAS	0.0418542	0.0418542	91.8467	63.4057	45.2652	19.2577	0	0	64.8023	64.8023	1.68358	0.77532	33.9067	1.02449	31.8143	1.08232
AACS	11.7915	11.649	1.66565	1.41232	1.43685	1.22359	0	0	0	0	1.44872	0.0604846	12.8539	0.650647	11.0336	0.569301
AACSP1	0	0	0	0	0	0	0	0	0	0	0	0	0	0	0	0
AADAC	0	0	0	0	0.403015	0.384879	0	0	0	0	0	0	0.183595	0.0276214	0.0684878	0.0142786
AADACL2	0	0	0.948549	0.76623	0.0428382	0.0249276	0	0	0	0	0	0	0	0	0	0
AADACL3	0	0	0	0	0	0	0	0	25.6095	15.7276	0	0	0	0	0	0
AADACL4	0	0	0	0	0	0	0	0	0	0	0	0	0.00383086	0.00261838	1.04232	0.10758
AADAT	0	0	0	0	0	0	0	0	0	0	3.31138	3.31138	9.07781	0.254654	3.71206	0.0655802
AAED1	0	0	11.7723	10.4755	2.74611	2.12284	0	0	1.72937	1.72937	2.62727	1.33828	18.4182	0.992692	10.2333	0.473648
AAGAB	13.868	12.3656	1.67936	0.969576	4.9165	2.54902	0	0	0.322013	0.322013	4.9385	2.31892	56.1776	0.918119	52.7839	0.7167
AAK1	11.4802	4.09631	30.0916	9.10043	26.6116	6.88079	0.579336	0.318934	3.75792	1.90055	142.022	46.9878	15.8357	0.4263	13.1989	0.190391
AAMDC	1.04179	1.04079	9.51906	9.01227	31.1532	20.754	0	0	227.011	102.017	40.6527	12.8746	42.2755	0.696652	42.1433	2.43057
AAMP	145.754	65.4336	85.2091	29.0994	29.6396	14.9036	96.0786	96.0786	1.88965	1.2221	5.53865	0.422472	45.2752	0.887415	40.3719	0.557676
AANAT	0	0	0	0	0	0	0	0	0	0	0	0	0.0209933	0.0143335	0.0958376	0.0158835
AAR2	2.68186	2.68186	32.1122	20.3875	7.29605	5.8411	21.1629	17.7911	13.2366	9.47029	7.05345	3.76119	15.4481	0.4032	17.6877	0.223146
AARD	0.375263	0.336675	0.397162	0.189109	1.18548	0.410085	0.254994	0.254994	0.693659	0.615663	0	0	0.31456	0.124539	0.16909	0.0594847
AARS	5.51231	4.09995	61.5845	27.0388	68.9418	19.14	26.1707	26.1707	5.69791	4.0897	22.8711	18.4776	91.9159	0.87756	88.5167	10.5238
AARS2	4.38244	2.03855	1.59371	1.00576	3.76846	3.50192	0.716789	0.646097	6.88304	6.08989	2.7931	0.467843	4.45118	0.174431	2.39335	0.0425553
AARSD1	10.1987	9.32293	53.207	33.824	40.2543	16.9827	390.525	390.525	28.6217	19.1969	5.79761	5.79761	1.80689	0.164195	0.728074	0.0548006
AASDH	1.50138	1.10396	5.2085	2.42822	15.0529	7.63642	0	0	0.279664	0.279664	2.23544	1.51513	1.19813	0.0195993	1.77145	0.0218745
AASDHPPT	6.20037	3.36004	13.8935	4.27258	30.6635	7.69602	3.75834	3.08906	16.0533	6.6321	3.56473	0.966653	59.7873	0.453611	64.4486	2.99464
AASS	18.4032	14.2732	22.9601	7.7415	38.1274	23.7083	0.146414	0.140011	0.432936	0.38859	5.85975	1.63745	5.57206	0.495813	7.73354	0.598089
AATK	0	0	0	0	0.185302	0.185302	0	0	0	0	4.1563	4.1563	0.037382	0.0058761	0.0812723	0.0173191
AATK-AS1	0	0	0	0	0	0	0	0	0	0	0	0	0	0	0	0
ABAT	0	0	0.124086	0.0479087	1.21186	0.785799	0	0	0.00119906	0.00119906	1.22411	0.358893	1.28872	0.20017	3.09586	0.305889
ABCA1	23.4148	14.0338	30.1272	7.45804	90.3323	39.0308	9.29655	2.86344	31.2817	19.9799	23.9178	6.48177	3.87519	0.159687	28.2528	1.00474
ABCA10	0.365095	0.365095	0	0	0.00497954	0.00497954	0	0	0	0	1.05186	0.848776	0.0572878	0.0079755	0.125887	0.00728289
ABCA11P	0.000385107	0.000381661	26.2126	25.0033	17.6299	15.9891	0	0	2.83476	2.83476	0.39785	0.39785	0	0	0	0
ABCA12	0.158634	0.0847212	0.286684	0.162702	0.00777129	0.00777129	0.0471721	0.0471721	0.030265	0.030265	2.88542	2.72129	0.000277939	0.000124866	0.000176611	8.7698e-05
ABCA13	0.0353968	0.0276289	0.0377996	0.021105	0.0101385	0.0101227	0	0	0	0	0	0	0.0250151	0.00285889	0.00231267	0.000381097
ABCA17P	0	0	0	0	0	0	0	0	0	0	0	0	0	0	0	0
ABCA2	0	0	0.110443	0.110443	0.0793968	0.0793968	0	0	0	0	5.039	0.300644	13.7517	1.43906	14.8538	1.32451
ABCA3	0	0	0	0	0	0	0	0	0	0	4.69757	4.69757	0.304258	0.0603889	0.385706	0.00782423
ABCA4	0	0	0	0	0	0	0	0	0	0	0.0614323	0.0614323	0.0177571	0.00468895	3.17892	0.631252
ABCA5	2.96865	1.35462	11.4864	4.67313	4.58868	1.56483	0.0752533	0.0752533	2.84386	1.75315	13.1718	7.06551	0.848326	0.0743118	1.0479	0.136138
ABCA6	0	0	0.285964	0.285964	0	0	0	0	0	0	7.07025	3.1107	0.0428201	0.00730628	6.80761	0.381953
ABCA7	0	0	3.61334	3.61334	0	0	0	0	78.8016	68.1599	0	0	1.76446	0.316957	4.44303	0.719966
ABCA8	0.503087	0.297309	0.837347	0.531423	0.864087	0.579883	2.50206	2.50206	0.21601	0.21601	38.1828	24.2775	0.192784	0.0381807	23.0682	3.7157
ABCA9	0.0181735	0.0181735	0.00599065	0.00385635	0.0241301	0.0151751	0	0	1.17659e-05	1.17659e-05	0.97307	0.21956	0.0629905	0.00569005	4.21418	0.635359
ABCB1	0.802614	0.489915	4.95177	1.69423	6.15484	2.61648	0.0887857	0.0887857	0	0	0.0898015	0.0635617	0.260708	0.0132647	0.0511257	0.00823413
ABCB10	8.49756	8.15509	6.92454	4.61888	1.68297	0.830804	1.10481	1.10481	5.78827	5.78827	15.8431	10.2454	30.08	1.80594	14.1677	0.168219
ABCB11	0	0	0	0	0	0	0	0	0	0	0	0	0	0	0	0
ABCB4	0	0	0	0	0.285175	0.285175	4.32538	4.32538	0	0	0	0	0.0729678	0.0253601	0.115694	0.0339917
ABCB5	0.0660118	0.0525332	0.0574974	0.0430623	0.121546	0.0788057	0.0635025	0.0635025	0	0	0	0	0.00426488	0.00106518	0.0113482	0.00166371
ABCB6	5.09322	3.15759	23.2495	12.2845	52.864	27.1887	0	0	0.362449	0.226499	5.04086	5.04086	2.14822	0.0444832	2.82297	0.165292
ABCB7	29.381	22.4421	10.8348	4.66301	21.4693	11.6218	1.43604	1.43604	0.694886	0.441872	1.59154	1.23973	9.22039	0.207371	8.14881	0.376894
ABCB8	21.5445	21.3074	25.572	17.2077	3.19978	2.0351	0	0	0	0	5.18138	2.94236	27.6105	0.433205	21.171	0.290848
ABCB9	3.29756	2.52902	1.65941	0.767496	0.809832	0.316996	0.00292249	0.00292249	0.140998	0.140998	0	0	1.95461	0.114386	2.17578	0.0569861
ABCC1	1.17384	0.619876	1.2674	0.580889	24.9258	13.7944	20.6904	20.6904	0.592405	0.592405	5.35714	2.68658	5.04148	0.0784507	8.62451	0.230034
ABCC10	0.185741	0.185741	12.2204	12.0386	2.91043	2.04816	0	0	12.5672	12.5672	2.30387	1.89719	14.7121	0.0593954	15.8611	0.561362
ABCC11	0	0	0	0	0	0	0	0	0	0	0	0	0.00811068	0.00277379	0.0173828	0.00162769
ABCC12	0	0	0	0	0	0	0	0	0	0	0	0	0	0	0.000643055	0.00048088
ABCC13	0.00515667	0.00515667	0.00227276	0.00211987	0	0	0	0	0	0	0.127106	0.127106	0	0	0	0
ABCC2	7.38756	5.192	2.7798	2.65761	0.484805	0.405698	0	0	0	0	2.23526	2.00932	0.263822	0.0117342	0.0649767	0.00724559
ABCC3	0	0	0	0	0	0	0	0	0	0	6.05531	5.37493	22.5272	4.16069	33.8227	2.05302
ABCC4	0	0	0	0	0	0	0	0	0	0	0.291239	0.291239	9.31842	0.529826	5.99204	0.264241
ABCC5	0	0	5.61827	3.82576	0.832328	0.729088	0	0	0	0	0.925917	0.00967024	6.32513	0.238542	5.75491	0.100812
ABCC5-AS1	0	0	0	0	0	0	0	0	0	0	0	0	0	0	0	0
ABCC6	1.20536	1.20536	0	0	0.168032	0.168032	0	0	0	0	22.7975	22.7975	0.0198283	0.00588727	0.052406	0.0092266
ABCC6P1	0	0	0	0	0	0	0	0	0	0	0	0	0	0	0	0
ABCC6P2	0	0	0	0	0	0	0	0	0	0	4.05699e-05	4.05699e-05	0	0	0	0
ABCC8	0	0	0	0	0	0	0	0	0	0	0	0	0	0	0	0
ABCC9	12.1785	9.77561	6.18884	2.14063	9.16877	2.34186	2.8653	1.49111	8.66396	4.95546	55.0059	5.79768	2.23183	0.206342	4.10183	0.364199
ABCD1	6.78065	3.92457	6.91852	5.40995	36.8316	35.1066	0.100398	0.100398	5.77692	4.5017	13.482	13.482	13.8075	0.151	22.8134	0.39412
ABCD2	0	0	0	0	0	0	0	0	0	0	0	0	0.005257	0.00125293	0.00712097	0.000945301
ABCD3	7.30186	3.88075	19.5737	9.9537	5.76007	4.02882	0.20175	0.113759	0.776083	0.776083	12.7951	1.65468	17.6503	0.216251	16.6725	0.115406
ABCD4	9.95138	8.51733	48.6704	18.6726	101.803	36.2028	0	0	28.165	20.0719	1.99239	1.99239	16.9873	0.332867	21.0981	1.08163
ABCE1	0.535	0.324681	5.2771	1.7515	9.96473	3.23417	16.054	16.054	4.45363	2.67583	8.20426	3.47405	136.755	4.96325	66.4601	0.640487
ABCF1	103.804	43.3948	123.362	39.5467	143.894	29.9799	17.2961	16.9719	192.892	31.6324	229.581	43.3897	1.37353	0.0206354	0.735904	0.0333071
ABCF2	53.4461	38.9653	6.87338	6.50243	40.2975	32.7999	46.7704	46.7704	2.44077	2.44077	1.83763	1.83763	59.393	0.83733	50.8433	0.815132
ABCF3	27.3753	25.8075	45.0839	20.0877	51.2171	21.7889	37.0065	37.0065	79.4398	79.4398	4.35591	0.927151	31.6259	0.846372	31.3754	0.435722
ABCG1	4.42971	2.97297	4.76546	4.72535	4.19266	2.4146	0	0	5.43576	5.43576	12.4566	3.44297	0.0228885	0.00668497	4.44851	0.386842
ABCG2	1.16739	1.07622	7.11703	6.32444	0.236705	0.227481	0	0	0	0	9.54343	2.45309	0.357667	0.0252776	0.445459	0.0733863
ABCG4	0	0	0	0	0	0	0	0	0	0	0	0	0.0625936	0.0049542	0.0846598	0.011078
ABCG5	5.31286	5.31286	0	0	0	0	0	0	0	0	0	0	0	0	0	0
ABCG8	0	0	0	0	0	0	0	0	0	0	0	0	0	0	0	0
ABHD1	0	0	0	0	0	0	0	0	0	0	0	0	0.0132873	0.00487264	0.0130101	0.00890054
ABHD10	0.226256	0.226256	15.4668	13.4597	7.03382	4.18492	0	0	1.68875	1.68875	13.9966	5.10819	57.9566	1.45048	34.7806	0.306757
ABHD11	6.08158	5.60262	185.578	101.419	91.5073	35.0892	0	0	53.427	47.9981	44.9361	32.8016	0.140299	0.0149936	0	0
ABHD12	45.1265	27.5253	36.0125	15.5092	22.096	9.11994	0.784249	0.784249	2.76047	2.76047	59.1696	44.166	78.8658	1.33145	98.11	5.53519
ABHD12B	0	0	0	0	0	0	0	0	0	0	30.8457	30.8457	0.0228507	0.00812656	0.0100342	0.00377752
ABHD13	0.02171	0.02171	6.38745	5.84277	1.08637	0.660276	5.36191	5.36191	0	0	1.57037	0.642409	5.66815	0.144515	7.09628	0.0527636
ABHD14A	4.0252	4.00206	28.5138	24.5138	17.6835	16.568	0	0	48.5409	48.0565	0.0531294	0.0531294	7.88248	0.241467	12.7194	0.977792
ABHD14B	0	0	0.0835818	0.0835818	4.91974	2.46613	0	0	4.14705	4.14705	3.72947	2.38486	17.3344	0.60621	35.6852	2.09099
ABHD15	0.618944	0.412987	0.346344	0.254072	0.27977	0.106616	0	0	26.7883	21.8466	1.33362	1.33362	2.97551	0.0617824	3.95932	0.0512261
ABHD16A	37.494	30.0568	136.064	56.7569	84.2603	29.9064	32.8563	30.1544	8.7088	8.7088	14.1706	12.9679	0.0635812	0.0138055	0.0803628	0.010197
ABHD16B	1.55204	1.55204	2.02453	2.02453	0	0	0	0	0	0	0	0	0	0	0.00752388	0.00513735
ABHD17A	7.79135	5.32123	1.31271	1.31271	4.8365	4.75853	0	0	0	0	176.897	139.524	32.1299	0.474071	26.6045	0.675615
ABHD17B	2.90513	1.62237	2.67578	1.17122	3.71725	1.50598	0.61172	0.61172	0	0	3.87994	3.37452	11.0912	0.279201	19.641	0.195625
ABHD17C	0	0	0.798953	0.749661	1.35084	1.04874	0	0	5.21665	5.21665	7.4833	4.78993	8.69312	0.128644	77.3367	1.27197
ABHD2	0.297603	0.131986	0.689669	0.394466	0.611134	0.317152	6.13005	6.13005	1.35761	0.580046	4.55831	3.24553	201.544	3.14888	158.318	2.15064
ABHD3	41.651	36.2922	12.5816	7.86061	8.50435	3.67493	44.1246	38.4814	3.22554	1.94971	0.445014	0.445014	20.512	2.04138	11.3755	0.118198
ABHD4	7.57856	6.14487	55.6741	25.5786	45.7983	23.1058	0	0	4.38493	3.47242	17.5689	8.57553	68.4069	0.929525	137.444	2.61797
ABHD5	7.30853	2.98511	3.65822	1.48973	3.1038	1.156	0.819309	0.621626	5.51744	5.38055	2.94715	0.399773	104.011	14.4328	85.5028	5.27842
ABHD6	0	0	0	0	0	0	4.99725	4.99725	0	0	0	0	15.7082	0.59191	22.0118	0.305265
ABHD8	0	0	6.78484	5.83062	2.3636	2.01702	0	0	2.02462	2.02462	0	0	3.79343	0.0764784	8.086	0.193249
ABI1	0.539706	0.298475	11.8913	4.50773	8.52471	2.96941	71.1676	43.6724	14.8808	9.52089	59.0115	14.934	17.9316	0.584964	18.9444	0.264054
ABI2	0.219026	0.120512	0.452274	0.251383	5.5755	2.11487	0	0	0.0806398	0.0806398	8.07954	2.0994	99.729	0.301409	108.235	1.34914
ABI3	0	0	0	0	0	0	43.4272	36.0664	0	0	0	0	0.457795	0.0346955	0	0
ABI3BP	14.3696	14.3614	4.53338	2.92946	0.000746236	0.000746236	0	0	0.700164	0.612498	23.2156	3.61081	17.9723	6.8881	161.545	60.6658
ABL1	3.91806	2.83531	17.2641	8.5503	12.6462	7.39706	0	0	1.79325	1.79325	6.78456	0.178964	12.0292	0.701249	27.7757	1.77486
ABL2	3.09473	1.60618	4.02837	1.86455	2.73041	1.92072	0.00292504	0.00238252	5.44096	2.63091	5.77144	2.67932	17.0566	1.70372	5.22324	0.104762
ABLIM1	3.13676	1.84671	6.60992	2.85409	2.1882	1.45922	3.17439	3.06969	0.776608	0.527416	33.8309	31.9235	9.28048	0.59306	12.9361	0.118595
ABLIM2	0	0	1.18439	1.18439	0	0	0	0	0	0	0	0	0.0207629	0.00677179	0.0914178	0.0106297
ABLIM3	0	0	0	0	0.361815	0.252714	0	0	0	0	15.2613	8.71142	36.2778	0.666166	16.3656	2.69505
ABO	0	0	0	0	0	0	0	0	0	0	0	0	0	0	0	0
ABR	0	0	0	0	0	0	0.312359	0.312359	0	0	4.40673	2.40438	67.9676	2.75241	39.092	0.470611
ABRA	0.119304	0.0953386	0.441973	0.441973	3.6348	3.52768	0.560918	0.560918	1.96466	1.96466	0	0	0	0	0	0
ABRACL	39.917	37.9987	120.019	70.1627	44.3373	9.134	72.8687	64.9319	131.222	38.7741	10.1612	4.50515	173.713	11.0163	107.978	1.12009
ABT1	25.3316	17.0402	33.8729	14.7822	17.2314	6.69435	0	0	6.45066	6.45066	10.6056	3.5627	13.0666	0.203657	10.5355	0.160886
ABTB1	0	0	24.586	20.7131	22.3833	14.1778	0	0	0	0	2.35159	2.35159	13.2186	0.271331	15.6059	0.184239
ABTB2	11.6803	7.36567	8.46669	4.90828	0	0	0	0	1.05757	0.786774	1.15677	1.15677	0.493951	0.0992463	3.3696	0.0516052
AC000099.1	0	0	0	0	0	0	0	0	0	0	0	0	0	0	0	0
AC000124.1	0	0	0	0	0	0	0	0	0	0	0	0	0	0	0	0
AC002454.1	0	0	0	0	0	0	0	0	0	0	0	0	0	0	0	0
AC002463.3	0	0	0	0	0	0	0	0	0	0	0.142253	0.142253	0	0	0	0
AC002480.3	0	0	0	0	0	0	0	0	0	0	0.386615	0.00946615	0	0	0	0
AC003958.2	0	0	0	0	0	0	0	0	0	0	0	0	0	0	0	0
AC003984.1	0	0	0	0	0	0	0	0	0	0	5.47016	5.25253	0	0	0	0
AC004603.4	0	0	0	0	0	0	0	0	0	0	3.3185	1.33348	0	0	0	0
AC004862.6	0	0	0	0	0	0	0	0	0	0	0	0	0	0	0	0
AC004893.11	0.442809	0.442809	4.24005	3.87664	0.534784	0.337043	0	0	0.864359	0.864359	0	0	0	0	0	0
AC005062.2	0	0	0.0789807	0.0789807	0	0	0	0	0	0	0	0	0	0	0	0
AC005235.1	0	0	0	0	0	0	0	0	0	0	0	0	0	0	0	0
AC005358.3	0	0	0	0	0	0	0	0	0	0	0	0	0	0	0	0
AC006145.4	0	0	0	0	0	0	0	0	0	0	0	0	0	0	0	0
AC006196.1	0	0	0	0	0	0	0	0	0	0	0	0	0	0	0	0
AC006372.4	0	0	0	0	0	0	0	0	0	0	0	0	0	0	0	0
AC007038.7	0	0	0	0	0	0	0	0	0	0	8.08759	0.623512	0	0	0	0
AC007099.1	0.10431	0.10431	0	0	0	0	0	0	25.5564	25.0893	3.88965	2.11363	0	0	0	0
AC007131.1	0	0	0.385313	0.385313	0	0	0	0	0	0	0	0	0	0	0	0
AC007163.3	0	0	0	0	0	0	0	0	0	0	0	0	0	0	0	0
AC007163.6	0	0	0	0	0	0	0	0	0	0	0	0	0	0	0	0
AC007246.3	0.000116016	0.000116016	0.294813	0.165043	0.328147	0.133085	8.72066	8.72066	4.04235	4.04235	0	0	0	0	0	0
AC007359.6	0	0	0	0	0	0	0	0	0	0	0	0	0	0	0	0
AC007365.1	0	0	0	0	0	0	0	0	0	0	0	0	0	0	0	0
AC007386.2	0.307945	0.219384	0.243807	0.202791	0.0982507	0.0818343	0.000657187	0.000657187	0.338094	0.207396	0	0	0	0	0	0
AC007392.3	0	0	0	0	0	0	0	0	0	0	0	0	0	0	0	0
AC007392.4	0	0	0	0	0	0	0	0	0	0	0	0	0	0	0	0
AC007403.2	0	0	0	0	0	0	0	0	0	0	0	0	0	0	0	0
AC007405.4	0.115051	0.102848	0.156465	0.076746	1.03577	0.819167	0	0	0	0	0	0	0	0	0	0
AC007463.2	0	0	0	0	0	0	0	0	0	0	0	0	0	0	0	0
AC007740.1	0.0279077	0.0279077	0	0	0	0	0	0	0	0	0.672633	0.672633	0	0	0	0
AC007750.5	0	0	0.0924132	0.0859242	0	0	0	0	0.736793	0.736793	0.637202	0.0532948	0	0	0	0
AC007773.2	0	0	0	0	0	0	0	0	0	0	0	0	0	0	0	0
AC007879.2	0	0	0	0	0.692566	0.692566	0	0	0	0	0	0	0	0	0	0
AC007880.1	0	0	0.0311965	0.0311965	0	0	0	0	0	0	0.435582	0.435582	0	0	0	0
AC007966.1	0	0	0	0	0	0	0	0	0	0	2.33115	2.33115	0	0	0	0
AC008697.1	0	0	0	0	0	0	0	0	0	0	0	0	0	0	0	0
AC008703.1	0	0	0	0	0	0	0	0	0	0	0	0	0	0	0	0
AC009120.4	0	0	0	0	0	0	0	0	0	0	0	0	0	0	0	0
AC009227.2	0.0305098	0.0304944	0.00846199	0.00846194	0.0436763	0.026	0	0	0.0372846	0.0372846	0	0	0	0	0	0
AC009264.1	0.0333618	0.0333618	0.0313036	0.0313036	3.78558e-07	3.78558e-07	0	0	9.87988e-05	9.87988e-05	0	0	0	0	0	0
AC009299.3	0	0	2.76214	2.58672	0.0255852	0.0200806	0	0	0	0	0	0	0	0	0	0
AC009473.1	0	0	0	0	0	0	0	0	0	0	0	0	0	0	0	0
AC009501.4	0	0	0	0	0.117691	0.117691	0	0	0	0	0	0	0	0	0	0
AC009948.5	0	0	0.0278139	0.0213295	4.58735	3.02038	0	0	4.08859	4.08859	6.21596	4.2878	0	0	0	0
AC010127.3	0	0	0.0451793	0.0326012	2.27619e-07	2.27619e-07	0	0	0.173089	0.173089	0	0	0	0	0	0
AC010226.4	0.103331	0.103331	0.695417	0.563856	2.32783	1.59015	0	0	1.04629	1.04629	0	0	0	0	0	0
AC010731.4	0	0	0	0	0	0	0	0	0	0	0	0	0	0	0	0
AC010890.1	0	0	0	0	0	0	0	0	0	0	0	0	0	0	0	0
AC010975.1	0	0	0	0	0	0	0	0	0	0	0	0	0	0	0	0
AC010987.6	0	0	0	0	0	0	0	0	0	0	0	0	0	0	0	0
AC011343.1	0	0	0	0	0.00622724	0.00622724	0	0	0	0	0	0	0	0	0	0
AC011738.4	0	0	0	0	0	0	0	0	0	0	0	0	0	0	0	0
AC011747.4	7.68485	5.10774	3.66298	0.800341	5.8265	2.03797	1.15598	0.54067	3.72248	1.04209	14.5084	2.72662	0	0	0	0
AC011899.9	0	0	0	0	0	0	0	0	0	0	0.366504	0.366504	0	0	0	0
AC012075.2	0	0	0	0	0	0	0	0	0	0	0	0	0	0	0	0
AC012494.1	0	0	0	0	0	0	0	0	0	0	0	0	0	0	0	0
AC012507.3	0	0	0	0	0	0	0	0	0	0	0	0	0	0	0	0
AC016582.2	0	0	0	0	0	0	0	0	0	0	0	0	0	0	0	0
AC016738.3	0	0	0	0	0	0	0	0	0	0	0	0	0	0	0	0
AC016910.1	0	0	0.565219	0.565219	1.02253	1.02253	0	0	0	0	6.10582	6.10582	0	0	0	0
AC016995.3	0	0	0	0	0	0	0	0	0	0	0	0	0	0	0	0
AC017060.1	0	0	0	0	0	0	0	0	0	0	0	0	0	0	0	0
AC018464.3	0	0	0	0	0	0	0	0	0	0	0	0	0	0	0	0
AC018647.3	0	0	0	0	0	0	0	0	0	0	0	0	0	0	0	0
AC018742.1	0	0	0	0	0	0	0	0	0	0	0	0	0	0	0	0
AC018799.1	0	0	0	0	0	0	0	0	0	0	0	0	0	0	0	0
AC019048.1	0	0	0	0	0	0	0	0	0	0	0	0	0	0	0	0
AC019117.1	0	0	0	0	0	0	0	0	0	0	0	0	0	0	0	0
AC020571.3	0	0	0	0	0	0	0	0	0	0	0.34498	0.151918	0	0	0	0
AC022007.5	19.7549	13.1691	2.61422	0.960556	1.35446	0.738909	3.54533e-06	3.54533e-06	0.144252	0.144252	0	0	0	0	0	0
AC022173.2	0	0	0.628909	0.628909	0	0	0	0	1.5963	1.5963	0	0	0	0	0	0
AC068831.10	0.00746742	0.00746742	0.0581391	0.0414297	0.0507337	0.0507337	0	0	0	0	0	0	0	0	0	0
AC068858.1	0	0	0	0	0	0	0	0	0	0	0	0	0	0	0	0
AC072062.1	0	0	0	0	0	0	0	0	0	0	0.298996	0.298996	0	0	0	0
AC073133.1	0	0	0	0	0	0	0	0	0	0	0	0	0	0	0	0
AC073283.4	0	0	0	0	0	0	0	0	0	0	0	0	0	0	0	0
AC073628.1	0	0	0	0	0	0	0	0	0	0	0	0	0	0	0	0
AC074286.1	0.140767	0.111407	0.0217656	0.0217656	0.776559	0.567926	1.75838e-05	1.75838e-05	0.674154	0.674154	0	0	0	0	0	0
AC078941.1	0	0	0	0	0	0	0	0	0	0	0	0	0	0	0	0
AC079117.1	0	0	0	0	0	0	0	0	0	0	0	0	0	0	0	0
AC079145.4	0	0	0	0	0	0	0	0	0	0	0	0	0	0	0	0
AC079610.2	0	0	0	0	0.0944943	0.0944943	0	0	0	0	0	0	0	0	0	0
AC079776.3	0	0	0	0	0	0	0	0	0	0	0	0	0	0	0	0
AC090505.6	0	0	0	0	0	0	0	0	0.30667	0.30667	0	0	0	0	0	0
AC091729.9	0	0	13.6983	10.0248	0.863141	0.847947	1.57688	1.42133	0	0	0	0	0	0	0	0
AC091814.2	0	0	0	0	0	0	0	0	0	0	0	0	0	0	0	0
AC091878.1	0	0	1.24577e-05	1.24577e-05	0.00318069	0.00318069	0	0	0	0	0	0	0	0	0	0
AC093375.1	0	0	0.0296651	0.0211322	0.0452764	0.0251772	0	0	0	0	0.670112	0.670112	0	0	0	0
AC093590.1	0	0	0	0	0	0	0	0	0	0	0	0	0	0	0	0
AC093627.10	0	0	0	0	0	0	0	0	0	0	0	0	0	0	0	0
AC093690.1	0.0844458	0.0844458	6.25631	6.2312	0.833402	0.656488	0	0	0.218631	0.218631	0.233442	0.233442	0	0	0	0
AC096559.1	0	0	0	0	0	0	0	0	0	0	0	0	0	0	0	0
AC097468.4	0	0	0	0	0	0	0	0	0	0	0	0	0	0	0	0
AC097662.2	0	0	0	0	0	0	0	0	0	0	0	0	0	0	0	0
AC098823.3	0.137045	0.0802519	5.28837e-05	5.26431e-05	0.0213925	0.017145	0	0	0.000190874	0.000190874	0	0	0	0	0	0
AC099342.1	0	0	0	0	0	0	0	0	0	0	0	0	0	0	0	0
AC104134.2	0.943792	0.943792	43.6153	26.0877	14.2448	6.69301	0.152918	0.152918	7.92488	7.92488	8.65083	4.5306	0	0	0	0
AC104653.1	0	0	0	0	0	0	0	0	0	0	0	0	0	0	0	0
AC104654.1	0	0	0	0	0	0	0	0	0	0	0	0	0	0	0	0
AC104654.2	0	0	0	0	0	0	0	0	0	0	0	0	0	0	0	0
AC104655.2	0.40364	0.40364	0.852987	0.648737	1.03897	0.629999	0	0	5.50902	5.50902	0	0	0	0	0	0
AC104777.2	0	0	0	0	0	0	0	0	0	0	0	0	0	0	0	0
AC104777.4	0	0	0	0	0	0	0	0	0	0	0	0	0	0	0	0
AC105053.3	2.90237	1.61429	0.0505092	0.020465	0.269071	0.112181	0	0	0.18996	0.18996	0	0	0	0	0	0
AC105339.1	0.00817526	0.00784234	0.0619076	0.0437606	0.0231035	0.0189225	0	0	0.0789511	0.0789511	0	0	0	0	0	0
AC113607.2	0	0	0	0	0	0	0	0	0	0	0	0	0	0	0	0
AC125421.1	0	0	0	0	0	0	0	0	0	0	0	0	0	0	0	0
AC137932.6	0	0	0	0	0	0	0	0	0	0	1.71553	1.71553	0	0	0	0
AC144449.1	0	0	0.925452	0.771419	1.7368	1.25216	0	0	0	0	4.32733	4.32733	0	0	0	0
AC147651.4	0	0	0	0	0	0	0	0	0	0	0	0	0	0	0	0
AC159540.1	2.0267	2.0267	0.0144185	0.0144185	0	0	0	0	0	0	0.0661809	0.0657944	0	0	0	0
AC226118.1	0	0	0	0	0	0	0	0	0	0	0.11846	0.11846	0	0	0	0
ACAA1	32.764	32.764	71.1716	21.9353	68.058	24.1362	6.91594	3.45942	0	0	19.353	19.353	20.2016	0.493724	26.5321	0.945166
ACAA2	141.876	133.071	14.5085	11.0723	16.2895	6.40215	18.2946	18.2946	10.3087	9.77254	5.86805	5.47697	13.5576	0.108274	18.6216	0.487145
ACACB	0.0271868	0.0271868	2.25101	2.08921	0.0148551	0.0148547	0	0	1.60853	1.60853	3.13618	3.13618	0.987883	0.0416334	1.62513	0.067257
ACAD10	1.44711	1.41748	1.91954	1.66524	11.2417	10.6277	0	0	18.9037	12.2771	1.43145	0.247639	5.04018	0.13199	4.09941	0.149348
ACAD11	9.06548	6.34655	13.6898	6.61288	29.7781	9.25096	0	0	21.1093	21.1093	1.24069	0.469215	0.446909	0.0155539	0.430233	0.0182124
ACAD8	0.306513	0.223806	8.29391	7.42516	5.95507	5.91077	0	0	0	0	2.45115	0.02614	12.3158	0.336398	14.5747	0.486923
ACAD9	0	0	19.4507	14.0655	35.5897	18.7676	6.02201	6.02201	2.35827	2.35827	5.69306	1.94425	14.8446	0.85958	8.60498	0.477019
ACADL	2.10037	1.05268	1.13071	0.576172	1.86534	0.921668	0	0	0	0	22.1043	18.4785	0.0112112	0.00503672	0	0
ACADM	83.6043	43.6118	22.6602	8.10607	18.8977	6.38505	15.0412	11.3714	21.3419	8.75633	51.683	3.75789	33.6397	1.11949	23.9813	0.856031
ACADS	66.4299	66.2985	23.6329	20.7444	0.354507	0.354507	0	0	0	0	0	0	4.09627	0.158128	6.60623	0.1306
ACADSB	14.2802	9.18029	10.1541	7.20504	4.84422	1.6448	0.4244	0.314693	0	0	2.84575	0.99322	21.3477	0.819892	31.8469	0.615463
ACADVL	241.495	156.912	236.876	74.2661	220.345	46.2526	36.7995	36.7995	188.142	90.0989	129.287	37.6548	160.286	2.83772	136.422	5.60125
ACAN	0.0539352	0.0539352	0	0	2.63952e-06	2.63952e-06	0	0	0.060434	0.060434	0	0	0.00315284	0.00135487	0	0
ACAP1	0	0	0	0	0	0	0	0	0	0	2.19452	2.19452	0.174477	0.0219257	0.517293	0.0444853
ACAP2	4.95763	3.02184	4.878	2.28617	2.89443	1.285	2.08233	1.21737	3.95316	2.50233	5.1508	1.58345	75.4279	1.83152	82.4953	1.37766
ACAP3	0.456019	0.456019	0.145897	0.145897	1.98908	1.52624	0	0	1.28315	1.28315	2.48098	2.48098	62.3761	2.21192	25.3821	0.62503
ACAT1	0.735761	0.735761	11.0435	10.1089	8.14969	3.6641	0	0	0.713938	0.345602	9.54126	0.55541	68.7001	2.45028	51.4882	1.19311
ACAT2	2.33718	1.73167	62.1307	35.03	32.8458	14.2358	5.64567	5.64567	29.9938	28.1518	0.276522	0.276522	43.7117	3.01814	6.92692	0.0227763
ACBD3	75.3114	53.0353	6.07368	1.94704	17.9206	5.20534	5.71364	3.12531	60.8831	32.9901	27.308	5.53015	33.7434	0.700433	51.1391	1.30143
ACBD4	3.95956	2.8104	1.04206	1.01491	5.29171e-05	5.29171e-05	0	0	0	0	3.52633	3.52633	1.65829	0.0439464	6.62456	0.461624
ACBD5	7.90322	7.6383	11.4989	10.4877	4.82734	3.17674	0.040298	0.040298	0	0	4.33143	0.179456	21.6898	0.590274	17.9497	0.272414
ACBD6	88.298	44.9577	69.2232	20.3823	114.323	22.6346	0.202571	0.202571	0.164592	0.164592	2.92721	0.575592	1.18056	0.0377666	0.72392	0.0168908
ACBD7	0.0401945	0.0277373	0.0970085	0.0639795	0.123691	0.0649453	0	0	0.103301	0.066919	0	0	2.53115	0.2181	0.752487	0.100989
ACCS	0	0	43.8193	34.4913	8.73042	8.73042	0	0	0	0	8.98749	8.2636	3.66544	0.151451	6.28687	0.338536
ACCSL	0	0	0	0	0	0	0	0	0	0	0	0	0.00238631	0.00163103	0	0
ACD	4.74193	2.69754	5.97876	3.55681	8.0418	4.61725	0	0	85.3807	85.3807	0.82794	0.82794	6.94128	0.150924	2.24786	0.0762281
ACE	0.0157007	0.0157007	0.642689	0.621016	0.103235	0.103234	0	0	0	0	0	0	0.316372	0.0172854	0.267006	0.033983
ACE2	2.72916	2.28826	2.1164	1.78434	3.55908	2.55945	0	0	2.94579	2.46791	0.1053	0.1053	0.00575029	0.00393263	0.0250458	0.00970753
ACER1	0	0	0	0	0	0	0	0	0	0	0	0	0.0343626	0.000823618	0.0739932	0.00318232
ACER2	14.0299	9.02843	3.47207	1.97234	16.5854	15.7073	0	0	0.348913	0.348913	22.8618	2.73608	1.81522	0.177114	2.33853	0.183041
ACER3	2.92969	2.92969	0.975767	0.456303	3.84722	1.59606	49.1316	43.6932	0	0	13.8911	1.41611	7.21978	0.135818	6.90296	0.156312
ACHE	0	0	0.155594	0.155594	0	0	176.73	176.73	0	0	0	0	0.280456	0.0428417	0.113787	0.00641499
ACIN1	63.2898	25.2426	25.8848	7.99386	35.1263	12.5621	69.0294	65.4268	9.17553	5.36674	42.6199	8.36592	63.4853	1.26704	50.074	0.319793
ACKR2	82.2396	35.246	206.053	36.0458	275.958	36.5076	4.16152	2.46199	968.403	191.038	27.5415	22.0152	0.133504	0.041527	0.249928	0.0148334
ACKR3	0	0	0	0	0	0	0	0	39.6035	16.0436	3.97845	2.13255	0.256698	0.0297978	40.7897	1.88784
ACKR4	0.140376	0.114054	0.68292	0.575784	0	0	0	0	0	0	0.235908	0.235908	2.45698	0.295727	0.434893	0.130459
ACLY	34.2256	16.9247	21.4298	6.8974	42.2315	10.8138	13.6055	12.6731	25.9778	20.2137	7.70475	1.32773	3.47446	0.177718	1.28074	0.0525019
ACMSD	0	0	0	0	0	0	0	0	0	0	0	0	0	0	0	0
ACO1	9.52872	7.83685	43.3257	15.7481	29.7192	13.4383	53.1548	52.4781	14.2265	11.246	7.94609	1.8897	13.3227	1.10078	24.0009	0.290842
ACO2	258.78	171.82	164.952	63.3347	98.7812	40.9914	1.11209	1.11209	0.196117	0.196117	37.088	25.0288	61.6183	0.556491	84.3654	2.65419
ACOT1	0	0	44.0217	29.0797	11.8651	4.71353	56.2785	56.2785	0	0	5.23834	5.23834	1.40021	0.124731	1.97126	0.0441594
ACOT11	0	0	1.19266	1.13789	9.76895	6.13182	0	0	0.547104	0.338733	2.27189	2.27189	1.43628	0.0599924	0.234725	0.0659953
ACOT12	0	0	0	0	0	0	0	0	0	0	0	0	0.00580948	0.00397311	0.0205128	0.00798577
ACOT13	14.136	5.96298	17.021	4.34807	23.1298	4.78922	24.1408	13.3835	3.09111	1.14927	9.31687	1.0022	39.0596	0.517065	93.1869	2.62144
ACOT2	0	0	5.38414	3.6404	1.59959	0.642454	3.62497	3.62497	0	0	4.02688	4.02688	4.29982	0.160369	5.46013	0.0401033
ACOT4	21.7666	21.7666	1.03482	0.805037	19.5196	12.3844	109.48	109.48	0	0	13.9598	10.3479	0.540872	0.0218477	1.0265	0.304784
ACOT6	0	0	0	0	0	0	0	0	0	0	0	0	0	0	0	0
ACOT7	0	0	37.5172	27.7252	14.9658	8.30417	23.3645	23.3645	0	0	32.3889	12.1366	55.9384	2.19356	20.565	0.473631
ACOT8	1.89746	1.50655	4.05608	3.07832	20.5795	14.1747	0	0	2.00464	2.00464	0	0	12.0643	0.384556	15.5486	0.314981
ACOT9	0	0	14.929	14.8664	4.1662	2.95828	38.6384	36.8105	2.68748	1.34136	0.682921	0.682921	34.1692	0.24844	23.7839	1.32308
ACOX1	5.96247	3.57807	16.1348	4.62285	27.048	5.17139	0.42331	0.350256	52.971	21.5884	12.371	1.33406	39.153	0.427106	52.8472	0.961999
ACOX2	0	0	0	0	0	0	0	0	0	0	0	0	1.89119	0.315097	4.5659	0.16533
ACOX3	2.23054	1.46938	43.5139	23.8368	30.7096	15.2881	0.525099	0.525099	0.950036	0.950036	17.2885	4.10365	7.39418	0.150633	8.45319	0.0942435
ACOXL	0	0	0	0	0	0	0	0	0	0	9.52957	8.6908	0	0	0.015186	0.0104573
ACP1	61.3941	26.9048	98.3562	24.5129	104.934	18.6349	15.1786	12.1066	84.9628	50.2077	17.8622	1.45962	215.113	3.91385	188.73	2.46827
ACP2	0.919556	0.919556	10.9987	6.61821	12.2551	6.77372	0.584812	0.584812	0.982854	0.982854	1.98295	1.98295	29.1868	0.70807	69.1956	3.23795
ACP5	0	0	0	0	0	0	0	0	0	0	17.2966	11.2964	4.60549	0.839373	7.92803	0.389352
ACP6	0	0	29.9782	20.9057	11.4518	7.21732	0	0	0	0	5.64253	5.64253	0.157061	0.0106864	0.126795	0.0279545
ACPP	0.169281	0.169281	21.8387	11.0667	8.78083	5.50343	0	0	0	0	2.35296	0.515809	7.20776	0.823696	2.27086	0.152215
ACPT	0	0	0	0	28.4318	28.4318	0	0	0	0	0	0	0	0	0	0
ACR	0	0	0	0	0	0	0	0	0	0	0	0	0.0200362	0.00461493	0.00701725	0.00481251
ACRBP	0	0	0	0	0	0	0	0	0	0	3.50643	3.50643	0.0498364	0.0116835	0.118851	0.0322015
ACRC	0	0	0	0	1.78642	1.78642	0	0	0	0	1.56852	0.141325	0.267865	0.0136061	0.0891651	0.00755911
ACRV1	0	0	0	0	0.254815	0.254815	0	0	0	0	0	0	0.0361674	0.00990549	0.0177446	0.00793986
ACSBG1	0	0	0	0	0	0	0	0	0	0	0	0	0.078193	0.0150699	0.024606	0.00336795
ACSBG2	0	0	0	0	0	0	0	0	0	0	2.85507	2.33834	0.00934255	0.00342148	0	0
ACSF2	329.037	300.854	52.1631	23.8936	61.1104	27.6523	0	0	0.768816	0.768816	7.55191	4.18793	11.4935	0.669532	13.3984	1.02155
ACSF3	1.47002	1.47002	9.39243	7.84517	9.20971	8.71681	8.36975	8.36975	0	0	0	0	12.5859	0.119118	11.3931	0.108186
ACSL1	0	0	4.17869	2.2439	5.48267	3.44277	118.525	109.318	0.226952	0.139595	7.01437	3.98163	9.49444	0.105142	16.2338	1.31871
ACSL3	96.6302	62.4218	41.5456	19.1872	30.985	5.40611	135.432	135.129	5.90685	2.85703	15.9837	1.28072	102.622	1.1244	110.423	1.79242
ACSL4	78.8336	65.866	11.7996	4.46829	13.8183	5.57366	5.51052	5.19707	30.537	10.2805	7.56686	2.60065	165.603	1.13924	219.15	2.16414
ACSL5	0.165096	0.0822532	0.428915	0.365401	1.1425	0.892254	0.252259	0.252259	12.3084	10.4951	3.9893	2.26415	0.399663	0.0492068	0.172633	0.0215504
ACSL6	0.0405382	0.0399117	0.182557	0.0596666	0.32557	0.119402	0.198047	0.178253	0.611934	0.459906	0	0	0.0373354	0.010058	0.0166373	0.00262666
ACSM1	0	0	0	0	0.654986	0.654986	0	0	0	0	0	0	0.00224981	0.00153609	0	0
ACSM2A	0	0	0	0	2.53878e-06	2.53878e-06	0	0	0	0	0	0	0	0	0.00245617	0.00167547
ACSM2B	0	0	0	0	0	0	0	0	0	0	0	0	0	0	0	0
ACSM3	66.1987	66.1987	0.231764	0.161321	5.36536	2.98638	0	0	0	0	0.961835	0.961835	0.232272	0.0330071	0.278098	0.0271131
ACSM4	0	0	0	0	0	0	0	0	0	0	0	0	0	0	0	0
ACSM5	0	0	0	0	0	0	0	0	0	0	0	0	0.0542045	0.00689786	0.178978	0.0475134
ACSS1	627.646	319.672	238.303	52.5525	168.739	33.6518	0.127846	0.127846	0	0	117.03	38.2874	0.416101	0.033219	2.54317	0.188827
ACSS2	0.224127	0.159738	4.21875	3.09728	0.460977	0.383263	0	0	0	0	12.1184	10.2111	16.8277	0.61074	20.9865	0.398674
ACSS3	0	0	0.192575	0.192575	0	0	0	0	0.084692	0.084692	0.444668	0.262763	7.33051	0.443068	9.69622	0.114826
ACTA1	0	0	0	0	0	0	0	0	0	0	0	0	0.0296434	0.0031379	0.0257351	0.00999873
ACTA2	0	0	9.5657	9.5657	0	0	0	0	0	0	237.164	14.6144	402.11	38.587	386.705	28.756
ACTB	2157.87	586.472	3739.41	363.665	3045.33	275.595	5718.05	1535.24	4564.45	1720.51	3490.88	442.848	14326.1	526.908	5514.46	179.854
ACTBL2	0	0	0	0	0.0961552	0.0961552	0	0	0	0	0	0	0.0323947	0.00824213	0.487153	0.0149675
ACTC1	0	0	0	0	0	0	0	0	0	0	0	0	146.952	4.70335	7.66233	0.682475
ACTG1	688.216	191.855	1422.69	261.405	1079.67	195.64	600.706	253.805	1871.81	867.857	32.606	7.36992	2746.59	174.644	958.593	23.0959
ACTG1P4	0	0	0	0	0	0	0	0	0	0	0	0	0	0	0	0
ACTG2	0	0	0	0	0	0	0	0	77.4686	77.4686	760.299	578.722	69.1374	16.5741	44.2069	12.0451
ACTL10	0	0	0	0	0.376622	0.376622	0	0	0	0	0	0	0.421025	0.0320987	0.619387	0.0360089
ACTL6A	0.390999	0.217334	19.4942	11.3337	38.7514	24.0942	0.148165	0.148165	15.0925	13.5046	9.32965	4.25716	101.245	1.05472	39.3258	0.576115
ACTL6B	0	0	0	0	0	0	0	0	0	0	0	0	0	0	0	0
ACTL7A	0	0	0	0	0	0	0	0	0	0	0	0	0	0	0	0
ACTL7B	0	0	0	0	0	0	0	0	0	0	0	0	0.00234675	0.00160494	0	0
ACTL8	0	0	0	0	0	0	0	0	0	0	0	0	0.0394134	0.0100109	0	0
ACTL9	0	0	0	0	0	0	0	0	0	0	0	0	0	0	0	0
ACTN1	48.9994	38.0468	64.6118	26.4749	45.6415	15.8375	16.9192	8.68056	33.7113	15.6709	29.9534	21.1673	650.075	2.30856	349.255	1.73354
ACTN1-AS1	0	0	0	0	0	0	0	0	0	0	0	0	0	0	0	0
ACTN2	0	0	0	0	0	0	0	0	0	0	0.181531	0.181531	0.0516082	0.0186976	0.0173563	0.00756651
ACTN3	0	0	0	0	0	0	0	0	0	0	0	0	0	0	0.00429628	0.00293069
ACTN4	308.899	132.185	103.69	33.7965	133.025	37.765	23.7122	23.2783	41.6037	18.1668	341.393	24.9927	540.01	11.2103	256.127	1.20287
ACTR10	20.7759	11.0177	21.8712	5.57074	19.0479	5.66135	0.10386	0.10386	32.1821	9.84858	2.38373	1.48752	101.439	0.694453	103.481	2.43996
ACTR1A	30.8997	17.0789	37.4752	16.7142	45.7845	17.186	29.5278	29.5278	14.0236	7.16515	5.13434	0.831053	147.78	1.28443	127.107	0.631292
ACTR1B	0	0	8.00472	5.23423	0.33594	0.298148	11.7284	11.7284	3.65142	3.65142	10.6706	1.31921	76.5014	3.21882	49.2995	0.387533
ACTR2	19.9477	7.26502	43.2698	10.3473	36.0829	10.9068	64.6314	29.8995	38.0285	16.4305	41.0154	2.06287	402.484	4.86867	238.411	3.75921
ACTR3	26.2281	18.1391	8.96396	2.34668	17.5647	5.45272	8.46453	4.76394	19.8021	6.34385	16.1551	4.63124	674.663	23.0587	343.838	5.82453
ACTR3B	17.7328	17.461	0.776337	0.446559	0.0873406	0.0608894	0	0	0	0	14.0563	3.95905	2.31412	0.0618638	1.56089	0.0371696
ACTR3BP2	0	0	0	0	0	0	0	0	0	0	0	0	0	0	0	0
ACTR3BP5	0	0	0	0	0	0	0	0	0	0	0	0	0	0	0	0
ACTR3C	0.511634	0.343159	2.04074	1.25753	7.85437	4.87688	0	0	0	0	18.3739	1.38897	4.98743	0.509029	3.51936	0.598234
ACTR5	0	0	0	0	1.80377	1.74806	0	0	0	0	0	0	2.07897	0.0446323	1.0187	0.0175293
ACTR6	1.01276	0.924077	21.2164	9.68431	17.568	8.5749	0	0	1.93679	1.93679	1.16427	0.764381	22.8056	0.515789	29.5511	0.447559
ACTR8	0.90139	0.587389	2.22304	2.06388	10.7853	4.0727	0	0	0.198183	0.198183	0.891357	0.450821	20.7035	0.265761	22.584	0.757449
ACTRT1	0	0	0	0	0	0	0	0	0	0	0	0	0	0	0	0
ACTRT2	0	0	0	0	0	0	0	0	0	0	0	0	0	0	0	0
ACTRT3	0	0	0.0753687	0.0629698	2.47443	2.47443	0	0	0	0	0.191864	0.191864	2.36679	0.0667595	1.71115	0.0924438
ACVR1	1.53014	1.48354	7.00614	5.83132	5.78834	4.52713	2.04644	2.04644	15.0804	15.0804	3.19555	1.18701	96.1846	0.61542	104.993	1.48848
ACVR1B	0	0	0	0	0.101754	0.101754	0.508416	0.508416	5.9996	5.9996	0.330025	0.0632709	7.27382	0.133759	11.797	0.0967227
ACVR1C	0	0	0.0806183	0.0806183	0.135394	0.108067	0	0	0	0	0	0	0.132354	0.0111419	0.190818	0.0278146
ACVR2A	6.54994	5.40655	12.0738	3.10486	6.38389	5.01184	0	0	5.47228	3.96819	6.66408	0.546604	5.31973	0.173885	8.83126	0.139516
ACVR2B	5.37731	2.70858	0.711535	0.294264	0.790775	0.421743	0.186192	0.186192	3.50254	2.09633	3.56142	0.801281	0.416409	0.0222543	0.796796	0.0191966
ACVR2B-AS1	0.000251076	0.000214365	0	0	0.0305347	0.0216935	0	0	0	0	0	0	0	0	0	0
ACVRL1	0	0	0	0	3.10082e-06	3.10082e-06	0	0	21.7624	11.8227	3.55001	1.62754	1.99214	0.343113	1.99254	0.10697
ACY1	9.49741	8.53245	223.069	123.14	37.2458	29.4321	2.1404	2.1404	32.2696	26.9111	0	0	0.402107	0.0448222	0.418425	0.0224951
ACY3	0	0	2.80464	2.80464	0	0	0	0	0	0	0	0	0.0133868	0.00914002	0.00878909	0.00600124
ACYP1	0	0	14.038	8.24158	8.18257	3.89713	0	0	3.83578	3.83578	7.87737	1.00772	50.1823	4.20316	25.2698	0.270215
ACYP2	0	0	7.14358	6.71072	1.63711	1.07233	86.234	86.234	0	0	7.63898	7.63898	12.1391	0.405042	20.2565	0.50157
ADA	0	0	0.255668	0.255668	0	0	0	0	35.7963	21.9222	0	0	6.12917	0.238664	5.32021	0.264258
ADAD1	0	0	0	0	0	0	0	0	0	0	0	0	0	0	0	0
ADAD2	0	0	0	0	0	0	0	0	0	0	0	0	0	0	0.00588635	0.00401923
ADAL	0	0	1.61757	1.11498	9.39227	7.20853	0	0	0	0	3.08509	1.9228	5.0531	0.308484	5.24021	0.388507
ADAM10	64.7815	36.6953	36.1387	10.9023	27.1861	4.62882	15.1739	9.18374	89.5806	50.9051	13.4513	0.276743	158.595	1.06099	159.793	3.82729
ADAM11	0	0	0	0	0	0	0	0	0	0	0	0	0.123525	0.00399709	0.131821	0.0130876
ADAM12	17.4428	8.4947	4.8335	1.91338	1.83295	0.981235	0.288558	0.226104	208.34	74.0171	1273.03	357.429	337.238	26.2376	660.43	49.0888
ADAM15	0	0	0.931558	0.827863	0	0	0	0	0	0	5.79728	5.79728	33.7026	2.42006	28.4743	1.2695
ADAM17	52.9908	23.8585	72.3165	19.9785	60.4067	10.5572	176.803	105.745	97.8904	26.3938	100.267	77.2264	13.2764	0.120026	18.7406	0.713172
ADAM18	0.0255231	0.0255231	0	0	0	0	0	0	0	0	0	0	0	0	0	0
ADAM19	2.88158	2.60062	0.257205	0.132137	0.0864412	0.0409273	0	0	11.6417	8.18284	7.4456	3.7732	64.555	0.673887	34.954	0.677522
ADAM1A	0	0	0	0	0	0	0	0	0	0	1.75944	1.14436	0	0	0	0
ADAM2	0	0	0	0	0	0	0	0	0	0	0	0	0	0	0	0
ADAM20	0.333207	0.333207	0.0245897	0.0140369	0.00580044	0.00580044	0	0	0	0	0	0	0.0114072	0.00209555	0.0159917	0.00162303
ADAM20P1	0	0	0	0	0	0	0	0	0	0	2.9947	1.70753	0	0	0	0
ADAM21	0	0	0	0	0.48636	0.48636	0	0	0	0	0.18666	0.18666	0.0627807	0.00332995	0.0365098	0.00467145
ADAM21P1	0	0	0	0	0	0	0	0	0	0	1.28426e-06	1.28426e-06	0	0	0	0
ADAM22	0	0	0.0729936	0.0729936	0	0	0	0	0	0	0.0829859	0.0829859	0.374619	0.0446025	0.441364	0.0223608
ADAM23	0	0	0.0670734	0.0670734	0	0	0	0	0	0	0	0	4.74116	1.23683	2.28252	0.427509
ADAM28	0	0	0	0	0	0	0	0	7.79159	4.38633	0.750879	0.572611	0.0150762	0.00552866	0.233858	0.0183448
ADAM29	0	0	0	0	0	0	0	0	0	0	0	0	0.00396477	0.00271151	0	0
ADAM30	0	0	0	0	0	0	0	0	0	0	0	0	0	0	0	0
ADAM32	0	0	0.119583	0.119583	1.60805	1.60805	0	0	0.286202	0.286202	0.307185	0.307185	0.561763	0.025969	0.611057	0.0354815
ADAM33	0	0	0	0	0.0750086	0.0750086	0	0	0	0	3.5439	2.76809	8.35366	0.396537	10.2084	0.483397
ADAM3A	0	0	0.100488	0.100488	4.78276e-06	4.78276e-06	0	0	0	0	0	0	0	0	0	0
ADAM5	0	0	0	0	0	0	0	0	0	0	0	0	0	0	0	0
ADAM7	0	0	0	0	0	0	0	0	0	0	0	0	0	0	0	0
ADAM8	28.1625	28.1625	0	0	0.981887	0.981887	30.5546	30.5546	3.20796	2.17409	0	0	1.83392	0.0871151	0.370624	0.0451603
ADAM9	286.368	215.213	44.348	28.0092	16.7365	4.80611	29.4203	16.7679	111.779	29.9909	70.8248	12.7546	92.3931	1.50044	105.943	1.07654
ADAMDEC1	0	0	0	0	0	0	33.5185	30.1133	0	0	1.83932	1.07797	0	0	0	0
ADAMTS1	78.1365	33.5755	49.1497	23.7667	40.337	9.71945	2.58645	2.58645	250.494	85.047	48.835	6.30368	167.757	17.1188	930.223	67.4185
ADAMTS10	0	0	0	0	0	0	0	0	0	0	2.18368	2.18368	0.0321252	0.00400153	0.0357251	0.00435489
ADAMTS12	0	0	0	0	0	0	0	0	0	0	0.63414	0.63414	6.0614	0.171525	5.74599	0.235494
ADAMTS13	0.0968655	0.0968618	0	0	0	0	0.599188	0.599188	0.112406	0.112406	0	0	0.00547188	0.00180245	0.0147091	0.00336366
ADAMTS14	0	0	1.40082e-08	1.40082e-08	0	0	0.325471	0.325471	0	0	0.970769	0.970769	0.0961375	0.0105827	0.174857	0.0595158
ADAMTS15	0.754937	0.754937	0	0	0	0	0	0	0	0	0.469839	0.469839	0.0108559	0.00148205	0.207157	0.0281413
ADAMTS16	0	0	0	0	0	0	0	0	0	0	1.11665	1.11665	0.58159	0.00590628	0.889582	0.166325
ADAMTS17	0.00522845	0.00522778	0.0331076	0.0233869	0.0184402	0.0184402	0	0	0	0	0	0	0.0179488	0.00297248	0.173567	0.0509538
ADAMTS18	0	0	0	0	0	0	0	0	0	0	4.9907	2.60055	0.00716779	0.00489107	0.203427	0.057164
ADAMTS19	1.87592	0.722048	3.45016	2.18017	15.3245	8.65446	0	0	1.47208	1.47208	11.5994	9.62871	1.00649	0.135385	3.26536	0.429699
ADAMTS2	0.00168298	0.00168298	0.0797814	0.0797814	0	0	0	0	0	0	11.208	9.96359	88.1062	3.43238	113.867	14.7848
ADAMTS20	0	0	0	0	0	0	0	0	0	0	0	0	0	0	0	0
ADAMTS3	0	0	0	0	0	0	0	0	3.09675	2.78331	1.14253	1.14253	3.46133	0.3905	0.808989	0.0454668
ADAMTS4	3.59402	2.75196	3.65792	3.18689	0.619277	0.247722	0	0	0.464172	0.28778	0.149337	0.149337	7.80226	0.110436	5.71752	0.271482
ADAMTS5	0	0	0.34547	0.340551	0	0	0	0	0	0	8.53071	1.97657	7.21577	0.78025	62.5058	3.82632
ADAMTS6	9.56299	9.34814	9.80526	3.4997	7.6985	2.22539	0.0234254	0.0234254	0	0	24.4547	6.48419	7.70698	0.802031	4.0564	0.248651
ADAMTS7	0	0	0	0	0	0	0	0	0	0	0	0	4.12568	0.0544547	5.46327	0.317031
ADAMTS8	0	0	0.536094	0.536094	0	0	0	0	0	0	5.98827	5.98827	0.00608493	0.00275069	0.0179386	0.00309022
ADAMTS9	0.0131982	0.0131982	0	0	0	0	0	0	0	0	10.5493	7.54879	0.0826025	0.0123186	1.09129	0.22879
ADAMTS9-AS2	0	0	0	0	0	0	0	0	0	0	0.418178	0.27434	0	0	0	0
ADAMTSL1	0	0	0	0	0.151891	0.151891	0	0	0	0	0	0	0.0454731	0.0104753	0.00689879	0.00155216
ADAMTSL2	0.407998	0.279279	1.00703	0.427652	0.760315	0.422184	0.0727205	0.0718525	0.000242537	0.000242537	0	0	0.00970547	0.00125447	0.00214195	0.000491387
ADAMTSL3	10.7204	8.55077	10.9527	1.82865	12.2237	1.88036	1.42444	1.1597	8.38142	3.31684	84.4639	2.75231	0.165097	0.0112656	0.0757997	0.00615122
ADAMTSL4	141.282	52.7922	397.996	92.8369	286.598	47.6155	0.714435	0.714435	1.27076	0.786735	82.3898	9.39479	2.56954	0.825211	3.48999	0.925281
ADAMTSL4-AS1	0	0	4.2899	2.53496	3.92176	1.74578	0	0	1.78199e-05	1.78199e-05	1.64822	1.64822	0	0	0	0
ADAMTSL5	0	0	0	0	0	0	0	0	0	0	22.083	16.7807	7.21818	0.549846	5.28075	0.0471999
ADAP1	4.80616e-06	4.80616e-06	0.0490324	0.0490324	0	0	0	0	0.366746	0.343817	0	0	9.77694	2.15556	3.20319	0.68512
ADAP2	0	0	8.63679	3.45532	4.34379	1.9365	37.8612	26.7576	0	0	5.49996	1.75054	1.61648	0.0990342	1.23686	0.0503319
ADAR	3.11141	1.26937	44.8711	11.6753	52.4277	9.20412	6.03986	4.77632	58.3802	20.0076	106.695	26.3509	132.937	12.6936	131.817	4.85047
ADARB1	0.0423713	0.0423713	0	0	0	0	0.133645	0.133645	0.154434	0.154434	6.36175	2.04382	3.87543	0.395973	10.649	0.263117
ADARB2	0	0	0	0	0	0	0	0	0	0	0	0	0	0	0	0
ADARB2-AS1	0	0	0	0	0	0	0	0	0	0	0	0	0	0	0	0
ADAT1	0.136896	0.0902722	8.31605	6.50684	1.96349	1.73859	0.368839	0.368839	0.085645	0.0855899	1.92565	0.614686	53.0531	2.65137	29.2857	1.31837
ADAT2	0	0	0	0	0.26973	0.192468	0	0	0	0	0.20139	0.20139	6.20778	0.197469	2.44824	0.096968
ADAT3	55.6668	51.4518	1.07048	1.07048	0	0	0	0	0	0	0	0	2.70146	0.134234	3.29333	0.037964
ADCK1	0	0	1.84036	0.895679	17.4539	14.8944	9.19111	9.19111	0	0	12.9416	12.9416	3.54071	0.057005	4.70706	0.182018
ADCK2	18.6682	11.2739	46.3404	24.7836	1.76698	1.13887	0	0	0	0	18.7433	18.7433	5.2921	0.271355	3.02772	0.163782
ADCK3	0.000418629	0.000417326	0.00204089	0.00114721	0.429052	0.239885	0	0	0	0	2.51673	1.25964	1.66126	0.111241	1.60547	0.0234005
ADCK4	2.94918	2.31926	0.279676	0.279676	12.7136	10.9861	0	0	0	0	0	0	3.004	0.0602875	5.14087	0.140497
ADCK5	0	0	10.1917	10.1917	0	0	0	0	0	0	0	0	0.446735	0.0161017	0.201473	0.0153478
ADCY1	0.0310916	0.0185899	6.73238e-06	6.73238e-06	0.0287186	0.017247	0	0	0	0	0	0	0.395974	0.0118265	1.32702	0.292905
ADCY10	0	0	0.0320845	0.0183653	0	0	0	0	0.134652	0.134652	1.96214	1.96214	0.00820145	0.00123094	0.00323086	0.000359237
ADCY10P1	3.30282	1.99351	0.711102	0.430254	0.755897	0.23295	0.000586587	0.000581154	0.659328	0.347431	0.371385	0.371385	0	0	0	0
ADCY2	1.2003	0.945155	3.81522	2.27362	2.75446	1.76908	0	0	0	0	1.50133	0.134727	0.619256	0.121291	0.567915	0.0804626
ADCY3	0	0	0.126663	0.0933792	0	0	0.267746	0.267746	0	0	8.07294	3.40935	26.8825	1.59382	18.407	1.37056
ADCY4	0	0	3.68702	3.68702	7.35193	7.35193	0	0	0.116918	0.116918	30.2034	4.57218	0.673524	0.0645424	0.278417	0.0506977
ADCY5	0	0	1.35646	1.17598	0.103407	0.103407	0	0	0	0	6.14202	6.14202	0.13536	0.032515	0.181677	0.0316248
ADCY6	1.459	1.42975	1.39956	1.18367	6.80712	4.47114	0	0	0.200877	0.200877	3.94004	3.70245	14.0707	0.839256	23.1381	0.0898429
ADCY7	9.29177	7.1217	1.10531	0.401417	8.6495	3.90732	0.217617	0.109187	19.8756	14.3681	14.497	7.55919	16.7709	0.808854	13.8427	1.25779
ADCY8	0	0	0	0	0	0	0	0	0	0	0	0	0.0133299	0.00100874	0.000725165	0.000526265
ADCY9	0.142993	0.142993	1.03135	0.993607	0.243577	0.228166	0	0	0.0419101	0.0419101	4.41829	2.20629	33.5301	0.58562	50.2462	2.56316
ADCYAP1	0	0	0	0	0	0	0	0	0	0	0	0	0.242586	0.0696527	0.0626999	0.0342274
ADCYAP1R1	0	0	0	0	0	0	0	0	0	0	0	0	0	0	0	0
ADD1	50.3435	21.9006	9.31906	3.55563	22.9145	9.58716	0	0	21.4199	19.6317	26.0378	3.67839	141.635	2.60327	117.419	2.68397
ADD2	0	0	0	0	0	0	0	0	0	0	0	0	0	0	0	0
ADD3	5.99029	1.70734	30.4111	13.2283	21.8368	5.2365	0.31811	0.218853	7.59553	4.15449	27.2576	8.93314	83.2046	6.505	61.1677	2.48558
ADD3-AS1	0	0	0.0566909	0.0566909	0	0	0	0	0	0	0	0	0	0	0	0
ADGB	0	0	0	0	0	0	0	0	0	0	0.0595463	0.0595463	0.00140903	0.000961477	0.00122651	0.000836664
ADH1A	0	0	0.105241	0.105241	0	0	0	0	0	0	0	0	0	0	0	0
ADH1B	0	0	0	0	0	0	0	0	0	0	2.71737	2.71737	0	0	0.354262	0.120589
ADH1C	0	0	0	0	0	0	0	0	0	0	0	0	0.0087545	0.00597727	0.0938191	0.0135867
ADH4	0	0	0	0	0	0	0	0	0	0	0	0	0.00744168	0.00508637	0.0465778	0.00577678
ADH5	3.15761	1.51473	39.4219	16.745	39.6208	15.1362	0	0	20.3885	10.0297	26.5876	5.43859	213.306	1.1602	359.011	8.00914
ADH6	0	0	0	0	0	0	0	0	0	0	0.753205	0.326672	0	0	0	0
ADH7	0	0	0	0	0	0	0	0	0	0	0	0	0	0	0	0
ADHFE1	39.5184	37.5397	29.4026	19.3532	16.2849	9.30407	0.235147	0.235147	0	0	32.5593	16.8503	0.686809	0.0650623	2.46838	0.312668
ADI1	46.3717	19.1988	29.2104	6.19904	41.719	17.5769	5.47434	5.47434	6.91822	5.52168	11.6558	2.62454	114.009	0.771029	145.72	5.68053
ADIG	0	0	0	0	0	0	0	0	0	0	0	0	0	0	0	0
ADIPOQ	2.98815e-07	2.98815e-07	0	0	9.01294e-06	8.98046e-06	0	0	0	0	0	0	0	0	0.00278691	0.00190292
ADIPOQ-AS1	0.062196	0.0510124	0	0	0.00555218	0.00555217	0	0	0	0	0	0	0	0	0	0
ADIPOR1	61.9482	26.7174	169.087	41.7969	175.592	40.2237	108.196	105.663	38.9287	21.661	134.367	7.81661	71.0591	2.06493	102.196	1.56732
ADIPOR2	0.446315	0.272542	16.071	7.57619	8.39379	2.65167	0.281711	0.281711	13.1387	8.94913	4.64826	0.115812	225.629	6.4966	214.994	9.79147
ADIRF	549.051	290.284	1644.11	375.069	1352.54	287.936	727.612	727.612	175.174	175.174	59.5354	32.6216	0.168757	0.0391729	0	0
ADK	14.2828	11.8132	21.0041	9.75789	32.9347	7.96013	0	0	114.676	57.6144	28.2952	0.0597067	86.8574	2.66231	36.2314	0.995473
ADM	95.1324	55.6945	141.139	58.8687	93.2948	35.2585	0.243953	0.243953	1166.56	188.075	24.0187	18.1274	168.769	3.98062	830.132	84.2286
ADM2	0.290853	0.243732	0.136773	0.128325	0.000619591	0.000619591	0	0	0.0442775	0.0442775	0	0	4.78132	0.822439	7.54242	2.67809
ADM5	2.83122	2.33131	0.497939	0.497939	10.2511	8.90652	0	0	0	0	1.24003	1.24003	0.552953	0.0766636	0.444521	0.104374
ADNP	2.2797	1.44672	28.7448	7.54644	45.8371	19.2872	0.547045	0.320899	20.6462	9.24585	6.95883	0.287731	7.01006	0.0496656	6.39314	0.104404
ADNP2	5.47507	5.40356	12.3566	10.4222	9.3414	4.78871	0	0	7.83896	7.19442	4.08649	0.693392	19.5644	0.243361	13.5246	0.223046
ADO	1.87765	1.87765	3.13536	1.59277	0.0525612	0.0366455	0	0	0.0540134	0.0540134	2.60748	2.60748	24.3138	0.808107	14.6245	0.191066
ADORA1	0	0	0	0	0	0	0	0	0.243908	0.243908	1.77064	1.77064	4.50083	0.333152	4.87573	0.389477
ADORA2A	0	0	0.121939	0.087294	0.163118	0.163118	0	0	0	0	0	0	0.0863455	0.0241899	0.0453985	0.0131194
ADORA2A-AS1	1.31194	1.03418	0.0116411	0.0116411	0	0	0	0	0	0	0	0	0	0	0	0
ADORA2B	3.01538	3.01538	8.95736	7.3599	5.88391	2.57934	36.1948	36.1948	0.178263	0.178263	0.997316	0.997316	0.423814	0.0606797	1.11883	0.0893787
ADORA3	0	0	0	0	0	0	10.4835	10.4835	0	0	2.52127	0.0872517	0.109604	0.0212722	0.103944	0.0212367
ADPGK	4.37649	2.75714	17.0494	9.46508	17.8711	9.56323	81.5244	80.5006	3.91837	3.91837	22.5021	6.43437	44.9464	0.460558	72.4624	3.22189
ADPGK-AS1	0	0	0	0	0.0895256	0.0895256	0	0	0	0	6.82531	6.82531	0	0	0	0
ADPRH	1.57525	0.90142	1.39256	0.856884	0.38961	0.364159	0	0	6.72399	6.03796	3.63637	0.601	3.31836	0.13188	2.53092	0.0285322
ADPRHL1	0	0	4.71481	4.71481	0	0	0	0	0	0	0	0	0.99294	0.0332548	1.45741	0.0906352
ADPRHL2	2.15887	1.77836	88.1774	42.5658	92.7612	46.0345	0	0	0	0	0	0	29.8845	1.34296	20.4043	0.925212
ADPRM	0	0	11.4047	10.9721	5.33372	3.71796	17.0954	17.0954	26.289	25.7841	0.73837	0.570038	3.5835	0.0972079	4.14566	0.175502
ADRA1A	0.514124	0.417192	0.00138038	0.00124996	1.58349	0.745965	0	0	0	0	0	0	0.00898568	0.00382389	0	0
ADRA1B	0	0	0	0	0	0	0	0	0	0	0	0	0.291311	0.0275742	1.51224	0.0755395
ADRA1D	0	0	0	0	0	0	0	0	0	0	0	0	2.4089	0.404553	0.395815	0.0694842
ADRA2A	0	0	0	0	0	0	0	0	0	0	0	0	2.27407	0.36536	10.7563	0.670767
ADRA2C	56.1294	56.1294	0	0	0	0	0	0	0	0	0.607022	0.607022	0.892054	0.102489	239.095	14.718
ADRB1	83.8835	39.6358	256.726	53.7731	281.39	50.7434	0.683619	0.683619	0.416187	0.416187	24.636	5.12104	0	0	0.0182319	0.00268502
ADRB2	0.0664258	0.0664258	1.00929	0.702684	0.475259	0.345797	0	0	0	0	15.6707	5.03389	1.08217	0.191426	0.56801	0.048079
ADRB3	0	0	0	0	0	0	0	0	0	0	0.461194	0.461194	0	0	0	0
ADRBK1	10.0579	10.0579	1.49075	0.932697	22.9455	11.4894	0	0	0.148009	0.148009	25.4553	25.4553	62.0825	1.79918	51.8192	2.3004
ADRBK2	0.816138	0.614577	0.190677	0.121884	0.268656	0.0917906	0.0165121	0.0165121	0.452768	0.200202	20.864	11.3693	1.26583	0.0426384	1.67721	0.0719859
ADRM1	1941.78	1466.73	883.629	404.046	1160.88	295.31	477.568	446.011	36.798	36.798	11.2876	11.2876	140.932	4.35417	87.1992	0.98213
ADSL	29.662	26.6162	105.13	46.8791	78.8158	33.2738	49.7092	49.7092	0	0	38.1901	4.37807	38.9141	0.343961	24.9532	0.326898
ADSS	82.2268	64.3529	5.84386	2.88639	8.9353	7.10772	6.11621	5.5959	2.82619	2.02504	44.1026	8.48045	91.2231	1.43637	49.8956	0.675843
ADSSL1	0.201777	0.201777	10.0644	7.48669	2.80559	2.71367	0	0	0	0	0.788829	0.788829	0.566559	0.124154	1.85992	0.110082
ADTRP	0	0	0	0	0.0162045	0.0161768	0	0	0.38861	0.264359	0	0	5.46476	1.34369	0.178729	0.0651834
AEBP1	0.0641062	0.0641062	10.4451	10.4451	0	0	0	0	0	0	37.7318	12.97	354.032	15.8947	421.299	25.3929
AEBP2	14.9997	6.17627	65.2376	10.9627	72.3717	16.7659	0.425447	0.164726	41.1951	18.3491	12.5213	4.567	22.7217	0.59958	20.1519	0.384793
AEN	0.943245	0.943245	11.5822	10.8904	4.56992	4.03943	0.836666	0.836666	3.60598	3.60598	0.278201	0.278201	72.6923	1.36439	39.3283	3.01108
AES	23.6152	8.25155	37.9171	13.0619	31.5949	8.5365	19.1137	19.1137	113.799	51.3081	62.8636	30.5809	408.622	4.65835	534.672	2.5057
AF064858.7	0.13317	0.13317	0	0	0	0	0	0	0	0	0	0	0	0	0	0
AFAP1	0.412094	0.343552	0.724722	0.441072	0.0120391	0.0120391	0	0	44.7213	26.2508	8.94966	2.95679	62.8113	0.447346	105.837	2.79771
AFAP1L1	2.21956	0.864059	19.4883	12.1729	4.69514	2.26891	0.0479524	0.0479524	14.6646	6.75994	17.3689	3.81452	8.49224	0.111342	1.15214	0.182152
AFAP1L2	0	0	0	0	0	0	0	0	0	0	43.0468	27.1511	0.458816	0.0319705	0.405002	0.075081
AFF1	22.6319	13.342	8.76708	6.54076	6.93253	3.9764	2.32434	0.659795	57.9286	20.2456	1954.07	316.216	28.3076	0.434097	27.7638	0.646356
AFF2	0.00870016	0.00870016	0.753336	0.753336	0	0	0	0	0	0	20.934	13.386	0.000143547	9.81717e-05	0.000296245	0.000202083
AFF3	0	0	0.303856	0.254343	0.0308955	0.0233613	0	0	0.00153028	0.00153028	5.03238	2.01576	13.7937	1.54496	10.6447	0.352548
AFF4	38.0113	18.4038	47.5954	15.3377	99.7843	35.7354	3.03809	1.29614	58.3606	23.2017	279.472	26.5987	92.4819	0.234176	145.241	3.72147
AFG3L1P	10.8556	5.71273	11.4805	7.12121	35.2607	22.9492	0	0	1.05841	1.05841	26.0092	3.8445	0	0	0	0
AFG3L2	5.96965	3.69676	42.1588	12.8895	14.2343	5.56092	115.849	103.817	29.9165	27.8922	6.15719	4.40368	16.8402	0.636262	15.7072	0.340664
AFM	0	0	0	0	0.0462119	0.0462119	0	0	0	0	0	0	0	0	0	0
AFMID	32.3374	16.2124	51.4741	12.7378	45.2762	9.79909	401.056	376.243	35.3293	18.5828	6.67003	6.67003	23.1332	0.503191	25.7907	1.17334
AFP	0	0	0	0	0	0	0	0	0	0	0	0	0.2506	0.0598745	0.019259	0.00457512
AFTPH	14.6047	6.46792	15.1686	4.73528	12.853	4.71334	0.592352	0.177171	10.8809	7.59668	11.9815	0.698916	2.80891	0.0291371	3.55063	0.0908852
AGA	0.704127	0.704127	4.46793	3.50702	9.61029	6.57302	104.581	104.581	72.0379	14.5207	3.99224	3.18569	34.953	1.13674	62.0003	2.96656
AGAP1	2.39546	1.16245	1.70789	1.2837	34.9018	31.9565	0	0	0	0	6.09233	2.13258	4.0088	0.106869	4.36676	0.0449339
AGAP2	0.0978985	0.0978985	0	0	0.00717315	0.00717315	1.35019	1.35019	0	0	0.200896	0.200896	0.0065214	0.00149754	0.00960096	0.00126499
AGAP2-AS1	0	0	0	0	0	0	0	0	0	0	0	0	0	0	0	0
AGAP3	18.9127	14.0817	34.8157	25.7665	5.46005	3.00101	129.166	62.388	23.1454	22.5416	28.7961	28.3175	84.0845	0.674385	54.8906	2.1977
AGAP5	628.402	620.969	5.11165	4.07341	2.24716	1.61809	0.151635	0.151632	0.220466	0.220297	20.2992	13.6702	0.0387569	0.00190098	0.023609	0.00176902
AGAP6	10.8541	7.15355	5.58674	5.56402	3.97848	1.9496	64.7399	64.7399	9.10109	9.10069	33.7932	29.1041	0.849801	0.0125738	0.705379	0.0478665
AGAP9	41.9006	34.1508	4.88627	2.66042	9.72676	4.40912	1.62809	0.832989	9.18934	5.25196	5.22203	4.69727	0.955938	0.0351799	0.359847	0.0187852
AGBL1	0	0	0	0	0	0	0	0	0	0	0	0	0	0	0	0
AGBL1-AS1	0	0	0	0	0	0	0	0	0	0	0	0	0	0	0	0
AGBL2	0	0	0	0	0	0	0	0	0	0	0.218447	0.218447	0.124456	0.0153536	0.168746	0.0162972
AGBL3	0	0	0	0	0	0	0	0	0	0	0	0	0.159096	0.0102004	0.0789752	0.00422746
AGBL4	0	0	0.21401	0.210057	0.000241012	0.000241012	0	0	0	0	2.74635	2.74635	0	0	0	0
AGBL4-IT1	0	0	0	0	0	0	0	0	0	0	0	0	0	0	0	0
AGBL5	10.5593	6.58938	7.46508	3.505	5.76685	3.73545	1.8579	0.928989	13.7695	12.7793	2.91315	0.571549	5.70755	0.516733	8.8955	0.202766
AGBL5-AS1	0	0	0	0	0	0	0	0	0	0	0	0	0	0	0	0
AGER	0	0	0.665564	0.665564	0.998501	0.998501	0	0	48.1339	48.1339	4.82793	3.63275	0.0217131	0.00529794	0.0337525	0.0121043
AGFG1	7.48938	3.59418	20.998	10.8745	15.3217	4.13756	8.05766	7.2706	5.19412	2.35005	23.0387	7.27892	26.0628	0.581415	25.8317	0.381247
AGFG2	0.162232	0.162232	0.0196719	0.0196719	3.83657	2.67791	0	0	0	0	0.676987	0.676987	6.58672	0.157839	12.3341	0.385242
AGGF1	12.9896	9.33919	8.00609	4.36852	2.25525	0.792722	0.343563	0.343563	0	0	6.05462	0.552409	23.6671	0.149359	21.5806	0.308285
AGK	0.201187	0.201187	21.9311	19.0909	12.4147	6.56617	0	0	0	0	5.736	0.281405	8.12865	0.114921	6.307	0.278089
AGL	22.4776	11.3138	11.2878	2.33937	10.7436	2.47888	0.8662	0.8662	2.70487	2.51111	11.9096	0.416007	0.810036	0.0227707	1.39697	0.0634586
AGMAT	3.21616	2.8777	0.392569	0.172602	0.224872	0.14666	0	0	0.28403	0.28403	0	0	1.11924	0.0362599	0.337336	0.0178547
AGMO	0	0	0.0338301	0.0240295	0.0651093	0.0651093	0	0	0	0	1.24252	1.24252	0.0597984	0.00666825	0.0102351	0.00700211
AGO1	1.50268	0.883364	0.0808741	0.0377723	5.35319	3.12233	0.0717313	0.0717313	7.58911	4.65276	0.949658	0.949658	2.68412	0.0933858	3.25484	0.0414322
AGO2	1.18193	0.600251	18.5415	9.0689	8.78904	5.3785	0	0	0	0	28.9377	15.7284	25.5088	0.26761	22.2599	0.452601
AGO3	0.186886	0.140071	0.0602897	0.0398496	1.98219	1.32967	6.4419	6.35441	3.75369	3.75369	18.8214	0.742988	6.22851	0.0424069	7.11609	0.100426
AGO4	9.99516	9.5592	0.934894	0.406715	3.73219	3.02339	2.52493	1.26289	28.6828	15.4995	5.24075	1.31069	21.001	0.572766	19.9766	0.154172
AGPAT1	0.746003	0.746003	76.2318	35.4794	78.7819	46.5445	0	0	11.6084	11.6084	169.588	67.28	2.5429	0.197392	2.91048	0.531554
AGPAT2	2.91514	2.27931	49.9519	49.9519	0	0	12.946	12.946	0	0	43.0896	43.0896	34.3881	0.824212	37.7505	1.01027
AGPAT3	1.25425	0.727306	5.57988	2.63322	3.43694	1.1922	0	0	0	0	0.628515	0.332979	160.268	0.608503	169.644	1.6463
AGPAT4	0.120047	0.120047	2.46755	2.36335	4.66095	3.57915	0.0576625	0.0576625	32.741	19.8763	7.44584	1.23442	20.174	0.311968	24.5797	0.257041
AGPAT5	0.0370168	0.0296237	0.779466	0.418055	0.496289	0.351223	5.10996	5.10996	0	0	1.00618	0.77894	88.8628	4.65384	79.3213	3.29422
AGPAT6	12.8417	7.04523	56.6101	47.7446	9.65663	3.73826	0.0763487	0.0763487	1.63019	1.17018	1.21239	0.731881	101.729	0.780459	101.185	0.506309
AGPAT9	0	0	0	0	0	0	37.9163	37.9163	0	0	0.283557	0.283557	10.5918	0.718458	33.4853	3.76666
AGPS	0	0	2.25354	1.08746	2.45065	1.03138	0	0	6.12558	5.83198	5.51638	3.88056	76.2393	0.438197	61.9891	0.412276
AGR2	6.92506	6.36387	7.95771	7.90272	1.77859	1.32283	0	0	0	0	1.53273	1.53273	0	0	0	0
AGR3	0	0	0	0	0	0	0	0	0	0	0	0	0	0	0	0
AGRN	0	0	0	0	0	0	0	0	0	0	4.93357	4.23224	174.658	5.35817	108.737	10.2942
AGRP	0	0	0	0	0	0	0	0	0	0	0	0	0	0	0	0
AGT	0	0	0	0	0	0	0	0	0	0	0	0	0.164602	0.0248017	0.115026	0.0299904
AGTPBP1	0.443081	0.340919	1.07318	0.632834	1.37609	0.766078	0.0559431	0.0559431	0.0959922	0.0589281	10.9394	6.6069	0.426247	0.0150112	0.433532	0.0378271
AGTR1	0	0	0	0	0	0	0	0	2.49149	2.49149	39.6902	3.72432	0.106	0.0327712	0.0467609	0.0191154
AGTR2	0	0	0	0	0	0	0	0	0	0	0	0	0	0	0	0
AGTRAP	0	0	8.85707	7.75774	8.10102	4.57252	406.047	406.047	70.9612	36.9219	0	0	64.307	1.5646	122.324	0.85656
AGXT	0	0	76.8674	76.8674	0	0	0	0	0	0	0	0	0.0136853	0.00675561	0.00551242	0.00376391
AGXT2	0	0	0	0	0	0	0	0	0	0	0.598784	0.598784	0.00575367	0.00393494	0.0321733	0.0104307
AHCTF1	4.21239	1.72037	9.89138	3.31664	24.1411	8.72553	1.10053	0.884565	1.58972	0.980473	15.7456	3.56267	2.56064	0.0621114	1.65255	0.0183008
AHCY	1.37157	0.929075	31.653	13.0373	38.8035	26.4516	0	0	0.433005	0.433005	14.087	2.16146	36.7398	0.247028	24.4452	0.307626
AHCYL1	58.6898	16.8143	45.3939	9.55865	27.9039	6.13361	8.83477	7.3809	15.0008	12.9177	29.1135	2.70805	97.8221	1.97444	137.783	6.28812
AHCYL2	3.58801	1.75576	15.5217	10.1547	22.0264	7.14745	0	0	0	0	6.41086	0.594397	8.56273	0.166341	11.4754	0.454468
AHDC1	1.31821	0.909272	0.588091	0.554184	2.35176	1.6136	0	0	4.68346	4.05241	0.299178	0.299178	20.2925	0.315629	9.94768	0.242805
AHI1	50.884	30.6747	34.2631	10.1788	13.8135	3.18703	5.47709	4.46537	18.254	7.12336	22.9724	0.797978	9.86291	0.368136	15.2558	0.476724
AHNAK	178.427	48.1647	26.9495	4.04204	49.2108	15.0338	7.15212	4.32607	57.7075	30.4824	85.649	15.3692	225.944	6.50782	54.34	2.66204
AHNAK2	83.9766	83.9766	0	0	0	0	0	0	19.6758	12.0269	0.760136	0.0331995	0.837819	0.0647973	0.519847	0.0179058
AHR	2.29708	1.12565	2.03771	1.41374	2.37285	0.878929	4.16194	4.16194	0.204345	0.126457	294.054	52.6731	51.7211	0.492768	32.9479	1.88479
AHRR	0	0	0.308777	0.308777	0	0	0	0	0	0	0.494414	0.11878	29.0375	1.57314	20.7013	0.142348
AHSA1	64.2947	17.3757	183.912	84.3712	163.672	37.5859	10.5449	8.28467	63.6185	51.7515	51.5413	20.3126	144.401	0.552746	161.431	0.856502
AHSA2	6.18859	5.72593	5.66804	4.18344	1.96979	1.07629	0.271785	0.271785	6.17225	5.24612	17.6941	0.927437	58.14	1.27099	71.2537	3.06531
AHSG	0	0	0	0	0	0	0	0	0	0	0	0	0	0	0.00503095	0.00359167
AHSP	0	0	0	0	0	0	0	0	0	0	10.5921	10.5921	0.0680749	0.0464521	0.059257	0.040422
AICDA	0.0105306	0.0105306	0.195532	0.113623	0.0671824	0.036701	0	0	0.000144693	0.000144693	0	0	0.0306762	0.013721	0	0
AIDA	21.9676	18.8332	4.40181	1.86445	6.04426	1.85648	82.6797	81.9326	0.0402357	0.0402357	24.5916	7.4523	179.695	6.30589	111.228	4.63244
AIF1	0	0	0	0	0	0	8645.49	3973.84	30.0705	30.0705	353.201	40.9548	0	0	0	0
AIF1L	0	0	0	0	0	0	0	0	37.5782	15.1757	0.777416	0.365851	1.39258	0.153648	0.84881	0.222791
AIFM1	55.8015	32.4005	42.6906	16.3699	42.3521	15.8652	0	0	7.63047	7.63047	14.5686	11.0791	10.1774	0.138595	11.1884	0.0850109
AIFM2	2.15451	2.15451	1.60486	1.3583	8.98923	4.61159	0	0	0	0	0.493827	0.493827	11.2646	0.113402	18.0444	0.947826
AIFM3	0	0	0	0	0	0	0	0	8.87883	8.87883	0	0	0.119186	0.0255836	0.128769	0.0181192
AIG1	11.3517	7.10122	49.7466	26.7187	13.5502	4.84482	35.8511	19.5114	1.91741	1.61611	10.0961	10.0961	72.8576	1.62741	78.8127	4.0548
AIM1	110.889	41.3647	107.476	33.057	123.663	26.7053	5.01604	2.84501	24.858	24.5656	37.3302	11.1515	1.71678	0.0832476	0.252851	0.0136397
AIM1L	27.8092	13.3637	126.587	114.033	5.06883	4.53537	0	0	7.50593	7.50593	5.5128	0.342683	0.00361606	0.00162454	0	0
AIM2	0	0	0	0	0	0	0	0	0	0	0	0	0.00911142	0.0062313	0	0
AIMP1	12.6177	9.99479	17.1123	7.58629	12.6017	7.54519	3.48693	1.31623	28.6989	8.15813	1.55127	0.324466	23.2051	0.41945	17.7651	0.119353
AIMP2	22.8679	13.9123	75.7873	36.3724	75.5141	37.2843	100.539	100.539	8.64913	5.05995	5.21184	5.21184	35.1176	0.736869	29.7779	0.224881
AIP	9.33332	7.48192	189.622	84.6755	193.953	84.3271	0	0	0	0	57.3132	57.3132	34.5057	0.0839526	43.8858	1.93625
AIPL1	0.365034	0.318362	0.176414	0.136651	0.435527	0.146334	0	0	0	0	0	0	0.0153147	0.00621921	0	0
AIRE	0	0	0.393659	0.393659	0	0	0	0	0	0	0	0	0.0216045	0.00593654	0.0191246	0.00399402
AJAP1	0	0	0	0	0	0	0	0	0	0	0	0	0.41536	0.00924183	0.1103	0.00539129
AJUBA	0.0767849	0.0767849	1.74335	1.70385	0.699557	0.545922	0	0	0.203463	0.203463	3.86371	2.80004	135.021	8.99612	63.2292	0.651039
AK1	4.23086	4.23085	3.39367	2.76294	3.01273	2.16929	0	0	35.2975	31.3347	0	0	41.7865	0.830605	44.4015	0.662507
AK2	20.2103	12.0358	36.191	10.0026	31.6557	10.4261	182.225	154.027	2.98057	1.56656	23.3188	13.2755	155.257	2.85641	123.329	2.09032
AK3	14.9575	5.72009	20.9212	6.61189	20.5779	5.5047	2.74901	2.70584	5.52222	3.75123	12.2317	3.66906	73.0041	4.96289	159.669	7.56768
AK4	0.970066	0.454566	11.2602	6.88872	2.13167	2.01027	0.303804	0.303804	1.41805	1.29219	10.1234	9.74097	1.89349	0.361092	20.5134	6.05047
AK5	0.0545718	0.0406012	0	0	0	0	0	0	0.445723	0.328671	0.709134	0.709134	81.1992	10.0003	6.35244	0.662631
AK7	0	0	0.00624597	0.00624597	0.0361818	0.0361818	0	0	0	0	0	0	0.108845	0.0076659	0.177198	0.016713
AK8	0	0	0	0	0.20837	0.20837	0	0	0	0	0	0	0.0202522	0.00341988	0.0953974	0.00599462
AK9	6.13288	4.95601	2.31432	1.20239	5.71229	2.67338	0	0	132.864	132.864	3.52119	3.13944	0.26819	0.00639958	0.310172	0.0111338
AKAP1	0.116063	0.116063	23.7479	9.82659	5.29946	2.90309	0.24535	0.24535	0	0	3.41726	1.83727	18.7281	1.22757	11.4746	0.277806
AKAP10	68.1146	50.4212	16.6827	7.25175	11.935	5.02576	1.36096	1.36096	0.718989	0.473927	17.4285	3.65056	38.9489	0.707224	51.1762	0.961439
AKAP11	0.0395941	0.0382787	3.65436	2.49512	0.919407	0.415317	0.771877	0.771877	0.148479	0.148479	17.5326	3.72152	3.15997	0.136622	2.7342	0.103078
AKAP12	0.020981	0.020981	1.86197	1.43867	0.287545	0.264512	13.8057	13.8057	5.69962	4.11779	12.3208	3.84188	6.98319	0.0613759	26.4183	1.58176
AKAP13	371.221	334.824	106.94	22.4238	37.764	8.71994	81.6987	56.3885	12.5221	6.37838	23.664	2.0204	29.4736	0.429185	76.9686	2.30672
AKAP14	0	0	0	0	0	0	0	0	0	0	0	0	0.0852074	0.0262215	0.0459083	0.0171245
AKAP17A	71.0801	32.2142	59.2751	21.9553	62.0549	24.9383	0.32615	0.32615	1.82191	1.82191	28.2553	18.6058	6.63017	0.148162	9.11131	0.75809
AKAP2	37.2811	18.2061	12.4928	3.75354	13.1755	2.69995	10.0051	5.07095	1173.02	1117.18	18.5795	5.29195	0.310244	0.0210621	0.0925764	0.00373754
AKAP3	0	0	0	0	0	0	0	0	0	0	1.2475	1.2475	0.367158	0.027676	0.614551	0.101449
AKAP4	0	0	0	0	0	0	0	0	0	0	0	0	0	0	0	0
AKAP5	0.0812488	0.034754	0.0994802	0.0389965	0.103713	0.0320464	0	0	2.37258	1.62864	0.278012	0.132695	0.95121	0.0413548	0.365378	0.038887
AKAP6	0	0	0.438852	0.321293	0.0975361	0.0743881	0.203321	0.203321	0	0	1.32256	0.469354	2.54911	0.29245	3.53776	0.275843
AKAP7	0	0	1.3844	0.712807	4.72818	3.00276	0	0	3.44034	3.44034	1.54987	0.662046	7.9983	0.114195	3.32253	0.299196
AKAP8	98.0488	95.4407	20.9168	7.2541	68.5679	23.0682	15.0972	12.739	29.6743	6.22906	28.8092	3.83575	6.97237	0.222385	4.2967	0.170994
AKAP8L	137.248	135.249	12.7087	8.43047	41.5387	28.109	0	0	61.9432	61.9432	119.773	29.6981	8.87429	0.163718	11.4559	0.15443
AKAP9	841.812	413.573	141.494	37.6875	238.383	85.7112	44.3572	31.5771	283.346	171.573	89.4868	24.8262	4.40583	0.0940639	11.0471	0.41003
AKIP1	48.713	47.3819	25.201	15.7885	11.1635	7.31419	0	0	0.833651	0.833651	2.44333	2.44333	63.1356	1.82215	62.8951	0.414473
AKIRIN1	6.87034	3.43867	15.4431	8.15505	11.0058	4.53045	0.12358	0.12358	36.0882	24.8247	9.02693	6.35081	115.004	2.1236	154.37	0.818177
AKIRIN2	15.2406	7.53035	19.4797	14.3605	44.7606	13.9574	10.9353	9.79815	2.88768	2.88768	161.798	60.6555	62.2301	0.949245	83.2558	1.30467
AKNA	1.3365	1.29547	3.64598	3.12401	7.95426	6.01313	0	0	0	0	2.14609	0.419141	1.66871	0.0708213	1.34293	0.118598
AKNAD1	0	0	0	0	0	0	0	0	0	0	0	0	0.0271566	0.00456598	0.0242582	0.00376199
AKR1A1	41.4405	32.5946	301.848	97.5311	392.227	85.6042	169.857	162.76	131.764	62.735	6.34402	6.08843	72.9008	0.636642	107.417	2.19919
AKR1B1	2530.56	1317.88	1112.04	172.319	1815.93	198.517	282.685	277.022	823.485	75.2148	20.02	9.77764	311.797	37.134	317.562	18.7634
AKR1B10	0.028183	0.028183	0.0480563	0.03339	0	0	0	0	0	0	0	0	0.488442	0.111293	0.737095	0.168008
AKR1B15	0	0	0.0265732	0.0265732	0.106402	0.0594724	0	0	3.15911	3.15911	2.83725	1.77235	0.0224772	0.00285157	0.0089541	0.00400654
AKR1C1	0	0	0	0	0.651833	0.651833	0	0	0	0	0.00226022	0.00226022	5.97259	0.616232	29.6412	4.66443
AKR1C2	0	0	0	0	0	0	0	0	0	0	0	0	0.043387	0.0100712	0.126756	0.00862719
AKR1C3	0	0	6.05537	6.05537	0.425693	0.425693	0	0	0	0	0.941058	0.941058	0.0306398	0.000734387	0.0860259	0.0277876
AKR1C4	0	0	0	0	0	0	0	0	0	0	0	0	0	0	0	0
AKR1C6P	0	0	0	0	0	0	0	0	0	0	0	0	0	0	0	0
AKR1D1	0.0128716	0.0128209	0.00420342	0.00320905	0.00966351	0.00966351	0	0	0.341648	0.341648	1.01007e-06	1.01007e-06	0.0177569	0.00739878	0.0629667	0.0132062
AKR1E2	0	0	0	0	0.0584766	0.0584766	0	0	0	0	0.743111	0.743111	5.07559	0.484277	2.60958	0.445763
AKR7A2	2.06223	1.22439	23.3745	9.30662	5.52408	2.62653	1.07074	1.07074	0.735738	0.735738	0.506975	0.101807	39.051	0.264588	37.7798	2.92849
AKR7A2P1	0	0	0	0	0	0	0	0	0	0	0	0	0	0	0	0
AKR7A3	0	0	0	0	0	0	0	0	0	0	0	0	0.215219	0.0147733	0.10067	0.0209573
AKR7L	0.0789336	0.0789336	0.0550246	0.0550246	3.61617e-08	3.61617e-08	0	0	0	0	0	0	0.198122	0.0495853	0.0539162	0.0106072
AKT1	212.149	195.292	31.0565	12.9332	53.4826	24.8762	0.649202	0.478338	5.45138	5.25928	27.3087	15.6323	179.105	4.49581	114.037	3.05294
AKT1S1	0.553914	0.553914	14.2806	7.80941	4.56801	2.234	0	0	11.6005	7.81916	1.79987	1.088	53.4651	0.747184	54.5958	0.906209
AKT2	3.21915	1.65362	4.87877	3.54747	1.49168	1.12659	0	0	0.197745	0.197745	18.6695	0.112009	161.418	1.28291	121.8	0.692468
AKT3	14.3339	10.8929	4.19659	2.36536	1.84472	1.00257	2.09684	1.62007	20.8891	18.5594	5.53208	3.56095	125.364	3.07659	139.486	3.93685
AKTIP	27.9045	18.6731	19.7097	7.87982	27.8367	8.68462	0.0997434	0.0997434	3.00802	1.22656	8.31236	4.01188	10.5881	0.224877	10.7391	0.712531
AL109763.2	43.7816	43.7816	0.0880826	0.068026	0.0794215	0.0726103	0	0	0	0	0	0	0	0	0	0
AL121656.5	0	0	0	0	0	0	0	0	0	0	0	0	0	0	0	0
AL592528.1	0	0	0	0	0	0	0	0	0	0	0	0	0	0	0	0
ALAD	3.60463	1.88973	39.2116	10.2665	37.2819	12.1114	0.0650292	0.0650292	1.81318	1.13504	2.43213	0.220357	77.1888	0.615162	105.554	0.5535
ALAS1	149.699	73.5227	348.065	124.191	471.857	129.794	11.6048	10.3479	204.727	168.34	40.7584	25.7249	14.0168	0.63361	18.4049	0.178598
ALAS2	0	0	0	0	0	0	0	0	0	0	0.776798	0.550718	0	0	0	0
ALB	0	0	0	0	0.342042	0.342042	0	0	0	0	0	0	0	0	0.0139183	0.00625031
ALCAM	0.0608466	0.0608466	0.435351	0.421087	0.0983494	0.0911484	24.4264	12.8473	0	0	12.8358	10.3902	178.887	5.40018	112.949	7.56838
ALDH16A1	63.8994	38.6809	181.706	51.7664	127.8	47.8238	8.40386	8.40386	45.9894	29.4097	0	0	5.72438	0.673224	4.77564	0.260574
ALDH18A1	1.10188	0.864292	76.2691	38.4159	51.9938	20.976	1.41178	1.41178	25.0295	14.9046	8.67932	0.533266	53.5038	0.689857	83.5179	0.88655
ALDH1A1	0	0	3.35691	3.22328	0	0	122.983	122.983	0	0	2.6023	2.6023	76.5646	21.3016	2188.35	346.637
ALDH1A2	0	0	0.00921291	0.00921291	0	0	0	0	0	0	0.154884	0.154884	16.9152	5.46563	19.9828	6.71379
ALDH1A3	2.93877	2.11536	12.0887	5.94769	5.17886	3.08227	0.0843132	0.0843132	0	0	1.93171	0.232581	7.37964	0.988681	6.57816	1.349
ALDH1B1	2.24094	1.54055	9.65512	7.52182	0.0414941	0.0289165	3.81041	3.81041	2.04264	1.50121	0	0	13.0307	0.642872	7.26472	0.464691
ALDH1L1	0	0	0	0	0.131711	0.115107	0	0	0.315958	0.315958	0	0	0.679292	0.0322524	2.8252	0.516291
ALDH1L1-AS1	0	0	0	0	0	0	0	0	0	0	0	0	0	0	0	0
ALDH1L1-AS2	0	0	0	0	0	0	0	0	0	0	0	0	0	0	0	0
ALDH1L2	0.0164267	0.0157463	1.0711e-06	1.0711e-06	0.00116804	0.00116804	0.133764	0.133764	0.72383	0.552145	0.908972	0.809239	13.3301	1.07465	20.5894	5.28559
ALDH2	0	0	0	0	0	0	798.004	798.004	0	0	30.0524	30.0524	4.75455	0.544284	18.389	0.685469
ALDH3A1	0	0	0.00143509	0.00143509	0.16746	0.137848	0	0	0	0	0	0	0	0	0.00644371	0.00440831
ALDH3A2	0	0	1.21428	1.19689	0.917183	0.698788	0.600907	0.600907	0	0	1.94361	0.606353	36.8545	0.496	49.3847	0.601145
ALDH3B1	0.982172	0.681265	10.8416	9.24754	1.45666	0.609818	0	0	19.6304	18.5931	2.94835	2.94835	7.22707	0.0752796	15.8612	1.26047
ALDH3B2	0	0	0	0	0	0	0	0	12.6936	11.9423	11.6912	6.34362	0	0	0.0194371	0.00889457
ALDH4A1	1.94514	1.57071	17.1517	9.28496	17.3405	7.8677	0	0	0	0	1.38921	0.269282	2.70696	0.116313	2.72995	0.0200897
ALDH5A1	0.496703	0.240064	3.2592	2.54925	2.19335	1.13246	0	0	0	0	1.5452	1.54438	3.61452	0.0286795	4.81557	0.059662
ALDH6A1	11.2377	5.60888	13.6602	3.82599	32.0235	8.90735	120.831	86.3438	1.12811	0.611161	1.66449	0.255367	7.02144	0.0538259	18.6947	0.263638
ALDH7A1	107.059	35.4532	81.075	27.7178	85.7192	15.374	3.29956	2.83375	11.5363	8.07425	2.5396	0.164305	54.3626	1.82888	49.5743	1.54777
ALDH8A1	0	0	0.0225573	0.0209221	0	0	0	0	2.08451	2.08451	0	0	0.0838969	0.0178502	0.0518813	0.0192488
ALDH9A1	0.723435	0.723435	29.2598	12.6774	7.9374	4.44081	6.73737	5.2818	14.9814	11.9896	20.3894	11.8373	70.4695	2.48031	68.0539	1.45762
ALDOA	1614.96	926.497	4189.5	704.497	5261.05	668.12	2168.4	1275.81	1991.54	648.322	9.16045	4.92252	793.443	1.02173	770.316	10.4268
ALDOB	0	0	0	0	0	0	0	0	0	0	0	0	0.007186	0.00263521	0.157031	0.0360945
ALDOC	0	0	0	0	0	0	0	0	0	0	0	0	4.47979	0.749103	23.9028	0.657264
ALG1	1.5932	1.04958	0.816688	0.433333	1.4172	1.19787	38.0811	38.0811	9.12294	7.17589	0.311539	0.0533732	20.7226	0.159817	30.7506	0.442257
ALG10	0	0	0.00436088	0.00436088	0.775353	0.744198	0	0	0	0	1.48379	0.0530226	3.08169	0.215149	1.65215	0.027087
ALG10B	0.431737	0.259363	0.720084	0.248893	3.42544	2.6552	0	0	0	0	1.38396	0.230524	2.5085	0.0868527	2.89466	0.0887718
ALG11	0.22512	0.114362	13.675	9.01478	2.61131	1.35438	0	0	12.1319	11.6295	6.65454	3.59603	3.3275	0.0419555	7.49047	0.438
ALG12	0.662821	0.662821	4.41406	4.23619	0	0	0	0	0.798516	0.798516	0	0	23.741	0.431261	48.8444	6.42638
ALG13	3.23679	1.70542	1.52646	0.649618	20.9324	16.5129	19.4856	9.91144	16.3076	8.81294	15.8975	3.43112	12.0519	0.193879	12.3278	0.220491
ALG14	48.4732	37.4643	7.75541	3.96787	21.0909	9.58863	0	0	6.25873	4.66388	2.70992	1.58092	16.2173	0.688565	12.3548	0.966841
ALG1L	0	0	0	0	0	0	0	0	0	0	0	0	0.0879962	0.0410582	0.0617433	0.0150088
ALG1L2	0	0	0	0	0	0	0	0	0	0	0	0	0.145131	0.0240349	0.13139	0.0540511
ALG1L9P	7.62344	7.57443	0.166691	0.0645131	0.0844738	0.0396412	0	0	0.259739	0.180051	0	0	0	0	0	0
ALG2	0	0	1.91542	1.03082	1.65951	0.675751	0.763609	0.763609	0.767721	0.709499	3.83857	2.21466	18.3151	0.176814	43.4569	4.11331
ALG3	9.7582	9.50587	119.858	43.1709	89.5461	30.0296	45.6302	45.6302	27.2397	17.9343	22.3226	19.077	29.2883	0.510718	63.646	0.875065
ALG5	40.6596	34.9545	66.2279	26.5546	94.4836	31.5474	0	0	78.4336	63.6179	5.4573	4.36197	32.5514	0.763118	69.3293	6.69594
ALG6	0.312637	0.312637	4.56931	2.25533	13.8594	6.09226	0.444729	0.444729	21.5561	11.0238	2.76798	0.539717	10.6367	0.11539	6.89024	0.425436
ALG8	14.6671	12.5412	8.86084	5.62481	36.7499	13.4879	0	0	12.254	12.1024	47.1627	7.17497	39.8152	0.640215	39.6393	0.215235
ALG9	0.43465	0.43465	2.1246	1.49065	6.10238	3.13553	0	0	9.67856	8.86829	0.156118	0.156118	0.430478	0.0123666	1.25564	0.0489596
ALK	0	0	0	0	0	0	0	0	0	0	0	0	0.011446	0.00528579	0.00175368	0.0012341
ALKBH1	2.48063	2.4658	4.0431	2.50822	15.4966	7.66314	0	0	1.00923	1.00923	2.91966	0.647825	9.12102	0.111	9.76059	0.21415
ALKBH2	0	0	28.4581	18.9706	26.5845	20.3982	0	0	0	0	16.2782	16.2782	8.2646	0.573126	9.13101	0.17356
ALKBH3	0	0	0	0	2.27513	1.48287	0	0	0	0	0.398911	0.398911	21.6427	0.454555	19.5559	0.886263
ALKBH3-AS1	0	0	0	0	0	0	0	0	0	0	0	0	0	0	0	0
ALKBH4	0.248291	0.248291	11.268	9.1363	17.2948	16.1692	0	0	0	0	0	0	8.77134	0.138443	8.22331	0.332746
ALKBH5	25.9677	16.9876	28.4877	9.00392	88.9294	30.759	3.10179	2.43901	84.4686	52.5714	34.9455	0.322477	74.6906	4.19612	73.9382	0.99391
ALKBH6	0	0	10.9396	8.33432	0	0	22.5162	22.5162	0	0	0	0	4.27807	0.181114	4.44558	0.322517
ALKBH7	9.8869	6.83906	20.8003	11.1393	48.1456	28.2145	0	0	17.4854	16.1106	0	0	14.0386	0.782737	29.636	0.457507
ALKBH8	0.0947985	0.090805	10.2946	7.61949	0.944208	0.691948	0	0	0.112765	0.0790647	0.905482	0.29999	4.4111	0.190952	1.78136	0.0856345
ALLC	0	0	0	0	0	0	0	0	0	0	0	0	0.0040801	0.00279038	0.00553986	0.00378265
ALMS1	0.0699994	0.0421049	0.930398	0.831359	0.355795	0.185942	0	0	1.26118	0.664351	6.15101	1.39393	0.703814	0.018549	0.296527	0.00581843
ALMS1-IT1	0	0	0	0	0	0	0	0	0	0	0.136486	0.136486	0	0	0	0
ALMS1P	0	0	0	0	0	0	0	0	0	0	0	0	0	0	0	0
ALOX12	0	0	0.796297	0.58415	0	0	0	0	0	0	1.77203	1.77203	0.00340472	0.00232849	0	0
ALOX12B	0	0	0	0	0	0	0	0	0	0	0	0	0	0	0	0
ALOX12P2	0	0	0	0	0	0	0	0	0	0	0	0	0	0	0	0
ALOX15	0	0	0	0	0	0	0	0	0	0	0	0	0	0	0.00613942	0.00414022
ALOX15B	0	0	0	0	0	0	0	0	0	0	0	0	0	0	0.00320547	0.00118892
ALOX5	0	0	0	0	0	0	27.2989	26.5653	0	0	2.67951	0.281699	0	0	0	0
ALOX5AP	0	0	0	0	0	0	399.138	399.138	0	0	64.105	33.5574	0.124375	0.0171715	6.59457	0.128684
ALOXE3	0	0	0	0	0.0136378	0.0136378	0	0	4.57572	4.57572	0	0	0.0318506	0.00229847	0.0119859	0.00185481
ALPI	0	0	0	0	0	0	0	0	0	0	0	0	0	0	0	0
ALPK1	14.0369	10.2615	2.09734	1.37382	7.17909	5.67636	0	0	0.738669	0.738669	3.00918	0.634763	4.49176	0.0983935	5.64814	0.0570982
ALPK2	0	0	0	0	0	0	0	0	0.205622	0.205622	0	0	13.8758	0.349573	9.92439	0.204167
ALPK3	0	0	0	0	0	0	0	0	11.9589	11.8528	2.11607	1.53619	0.0210387	0.00162697	0.0224537	0.00262318
ALPL	0	0	0	0	0	0	0	0	7.0468	7.0468	0	0	0.110587	0.00811571	0.209082	0.0208238
ALPP	0.0566559	0.0566559	5.60443	3.44329	3.67774	2.66076	0	0	0	0	78.5987	32.2931	0.0146587	0.00409583	0.862733	0.101349
ALPPL2	0	0	0	0	0	0	0	0	0	0	0	0	0	0	0.0102505	0.0031601
ALS2	6.56982	6.56982	6.97518	4.9052	1.366	0.789328	0.0970682	0.0970682	1.05133	1.05133	7.30441	1.75576	17.9896	0.640925	11.5676	0.321045
ALS2CL	0	0	0.906505	0.906505	3.16438	2.55488	0	0	32.8425	32.4447	4.47639	2.91905	0.894361	0.0127862	0.226524	0.0361537
ALS2CR11	0	0	0	0	0.00710727	0.00710727	0	0	0	0	0.0720861	0.0720861	0.1402	0.00895074	0.0560349	0.00436457
ALS2CR12	0	0	0	0	0	0	0	0	0	0	1.69847	0.94288	0.256626	0.0259993	0.135797	0.0213369
ALX1	0	0	0	0	0	0	0	0	0	0	0	0	0.224302	0.0278898	0.0543964	0.0250945
ALX3	0	0	0	0	0.395356	0.395356	0	0	0	0	0	0	0.0286851	0.0128598	0.00927922	0.00344169
ALX4	0	0	0	0	0	0	0	0	0	0	0	0	0.00115727	0.000789686	0.0080847	0.00101345
ALYREF	210.265	129.613	42.4019	17.8923	23.5815	4.46672	61.7163	44.9189	6.49015	3.80485	8.85096	1.57529	250.187	8.15097	80.6142	2.64996
AMACR	1.37456	1.37456	5.34141	4.15175	1.11883	1.08723	93.9101	93.9101	0	0	2.92962	2.92962	2.18916	0.170596	1.69543	0.0741336
AMBN	0	0	0	0	0	0	0	0	0	0	0	0	0	0	0	0
AMBP	0	0	0	0	0	0	0	0	0	0	0	0	0.0135715	0.00928157	0.232019	0.0729491
AMBRA1	0.0616166	0.0383337	6.01603	3.2526	1.23603	0.749258	0	0	0.0565258	0.0565258	10.2323	2.59463	3.23978	0.0417566	3.62385	0.0429479
AMD1	43.6606	33.3017	47.4472	16.5267	27.6133	6.18867	324.38	300.957	27.1408	11.1549	12.373	0.801324	81.5395	0.953047	40.6565	1.40363
AMDHD1	0	0	0.165252	0.165252	0	0	0	0	0	0	0	0	0.0282963	0.00745267	0.0581268	0.00989275
AMDHD2	0	0	1.85776	1.85776	6.61312	4.6384	0	0	0	0	0	0	18.012	1.77297	6.9513	0.243838
AMELX	0	0	0	0	0	0	0	0	0	0	0	0	0	0	0	0
AMELY	0	0	0	0	0	0	0	0	0	0	0	0	0	0	0	0
AMER1	0	0	0.0368164	0.0258606	0.0259337	0.0209559	0	0	0	0	0.328215	0.328215	0.470931	0.003217	0.487799	0.0163384
AMER2	0.104679	0.0768115	0.00663759	0.00663759	0.00253121	0.00252623	0	0	0.00960415	0.00960415	0	0	0.00114584	0.000783179	0.00312413	0.00207534
AMER3	0	0	0	0	0	0	0	0	0.000572354	0.000572354	0	0	0	0	0	0
AMFR	56.2828	22.2626	48.0016	13.6181	22.3984	6.45044	6.52595	6.52595	70.1157	62.1768	0.365469	0.266649	121.242	4.03034	215.003	5.47776
AMH	0	0	0	0	0	0	0	0	0	0	0	0	0.53406	0.0726541	0.132741	0.0184044
AMHR2	0	0	0	0	0	0	0	0	0	0	0	0	0	0	0	0
AMICA1	0	0	0	0	0	0	32.5539	32.5539	0	0	0.829026	0.829026	0	0	0.00403719	0.00275396
AMIGO1	0	0	0	0	0	0	0	0	0	0	0.666153	0.0159971	1.05521	0.222561	2.04626	0.363882
AMIGO2	0.00524172	0.00524172	0	0	0.461745	0.300666	0	0	4.32179	4.21826	1.26302	1.26302	95.3912	9.35688	30.0338	3.88445
AMIGO3	0	0	0.190461	0.190461	0.51029	0.51029	0	0	0	0	0	0	0.00227518	0.00083434	0.00250572	0.000929379
AMMECR1	1.43482	0.910717	1.2459	1.08019	0.690975	0.268841	0	0	2.95018	1.99697	4.74666	0.126804	11.388	0.185781	13.4769	1.05711
AMMECR1L	0.576396	0.576396	4.7225	2.46541	2.28057	2.12384	0	0	3.10384	3.10384	1.94155	1.56996	12.7927	0.333957	18.5096	0.207108
AMN	0	0	0	0	0	0	0	0	0	0	0	0	0.13663	0.035597	0.559342	0.070225
AMN1	0	0	0.578746	0.326693	0.223286	0.102157	25.9587	25.9587	0	0	0.444404	0.444404	11.9893	0.679202	18.3901	0.434784
AMOT	8.20664	4.55968	55.7349	17.1063	34.3204	10.0231	0	0	2.22374	1.24751	17.0407	10.505	6.74879	0.160855	1.67257	0.0940562
AMOTL1	3.97514	1.61542	15.8234	5.13469	10.7876	2.447	0.0686649	0.0418623	12.7251	7.2988	13.2682	4.93036	6.19145	0.0801486	4.94964	0.09785
AMOTL2	97.6136	64.4737	21.6053	6.09645	33.4673	8.18934	0	0	36.5809	9.59102	9.95325	8.65335	141.728	4.04529	178.947	4.02444
AMPD1	0	0	0	0	0.0301763	0.0301763	0	0	0	0	0	0	0	0	0	0
AMPD2	0	0	3.99342	3.99342	4.44039	2.34264	4.25638	4.25638	30.7169	30.7169	2.82214	2.82214	42.0489	2.15369	60.1699	0.428698
AMPD3	0	0	1.98205	1.98205	0	0	0	0	3.3563	2.86399	5.99702	0.443879	23.1308	0.785402	29.8671	0.94792
AMPH	0	0	0	0	0	0	0	0	0	0	0.0893426	0.0893426	3.27378	1.05212	1.42992	0.405397
AMT	0.632475	0.373202	4.43505	3.90573	12.1683	6.20237	0	0	0.102075	0.102075	3.57189	3.57189	3.06111	0.331114	3.98988	0.523935
AMTN	0	0	0	0	0	0	0	0	0	0	0	0	0	0	0	0
AMY1A	0.440761	0.440523	4.54526e-05	4.49885e-05	8.94216e-06	8.94216e-06	0	0	0	0	0	0	0	0	0	0
AMY1B	0.282796	0.282648	2.93109e-05	2.90149e-05	6.32502e-06	6.32502e-06	0	0	0	0	0	0	0	0	0	0
AMY1C	0.141398	0.141324	1.46554e-05	1.45075e-05	3.16251e-06	3.16251e-06	0	0	0	0	0	0	0	0	0	0
AMY2A	0.380643	0.297003	8.29908e-05	8.29908e-05	1.45701e-05	1.34293e-05	0	0	0.000821211	0.000821211	0	0	0	0	0	0
AMY2B	2.29437	1.43065	8.31601	8.28926	1.27271	1.07509	0.551658	0.333325	0.000187528	0.000187528	0.0854868	0.0521094	0.293104	0.0243518	0.111227	0.0116555
AMZ1	26.6023	24.4264	32.0381	20.6475	16.8848	11.679	2.85578	2.85578	3.46383	3.09374	0.515275	0.515275	14.3043	1.38088	11.5686	0.342065
AMZ2	18.2931	14.0282	73.7301	33.1072	26.9078	13.1727	0.733609	0.733609	5.62483	3.04241	14.9339	6.49031	1.5796	0.0800575	1.17258	0.085836
AMZ2P1	0	0	0.427246	0.325248	2.67512	2.23122	0.103894	0.103617	0	0	0.120593	0.120593	0	0	0	0
ANAPC1	0.72924	0.394703	12.1961	8.76467	8.48554	5.08985	0.118737	0.118737	0.0743548	0.0743548	11.7829	7.0385	4.55287	0.0732232	2.33897	0.042008
ANAPC10	0	0	7.16596	5.69298	2.57472	1.07622	0	0	2.33366	2.33366	12.5276	2.01109	26.3573	0.347987	26.735	0.802666
ANAPC11	235.726	155.088	357.737	93.9926	728.066	115.508	251.046	203.587	229.876	100.326	223.243	31.3132	143.484	1.44211	103.798	3.06224
ANAPC13	4.96014	3.0461	83.3395	46.2031	52.0788	12.9252	48.5386	48.5386	84.2354	52.9666	20.6601	19.1872	278.326	5.4489	321.918	6.93614
ANAPC15	4.5053	3.53297	203.929	102.894	515.787	120.335	415.052	415.052	13.8786	13.8786	0	0	60.3593	2.03599	27.8599	0.205966
ANAPC16	22.7788	11.0659	34.1379	11.1836	28.9905	8.18282	327.689	282.952	19.6741	10.7736	18.097	4.96152	115.362	2.171	181.886	3.69499
ANAPC1P1	0	0	0	0	0	0	0	0	0	0	1.44457	1.44457	0	0	0	0
ANAPC2	0	0	0	0	0	0	0	0	0	0	0	0	21.5884	0.376952	17.115	0.757273
ANAPC4	55.1317	32.0321	8.61755	3.53361	18.5599	6.30923	0	0	0.622768	0.622768	0.686345	0.686345	17.3336	0.353526	9.65193	0.0707431
ANAPC5	89.8973	58.846	49.5535	13.1518	65.4652	15.6447	6.4576	4.58973	78.5162	61.259	27.9207	4.6233	48.8423	1.49023	40.347	0.172693
ANAPC7	0	0	0.594962	0.374252	4.26151	3.45399	0	0	0.15568	0.100531	1.60104	0.457418	35.0895	0.424145	18.2418	0.303849
ANG	0	0	2.07053	2.07053	0.911991	0.911991	0	0	0	0	3.36497	0.297988	4.6275	0.137805	21.3375	2.81256
ANGEL1	0.0651022	0.0651022	2.83248	2.80096	1.41908	1.35506	0	0	0	0	0.587641	0.383486	9.71077	0.310929	20.6523	0.45136
ANGEL2	0.0533314	0.0370296	0.797861	0.368974	6.983	3.30979	0.47728	0.47728	0.0503443	0.0503443	2.88143	1.19504	15.4186	0.091265	12.2241	0.334627
ANGPT1	0.408666	0.323196	0.320031	0.190244	0.587917	0.27896	0	0	0	0	4.09226	0.728694	51.6912	8.70976	204.773	4.04183
ANGPT2	0.0268862	0.0230972	0.0386899	0.0229025	0.0540506	0.0400534	0	0	0	0	0.907455	0.28326	0.224747	0.02829	4.03444	0.328738
ANGPT4	0	0	0	0	0	0	0	0	0	0	0	0	0.00531413	0.00237693	0.0267061	0.0123804
ANGPTL1	0	0	0.195315	0.195315	0.681629	0.681629	0	0	0	0	24.6136	8.13444	0.0152578	0.00501779	0.0571521	0.0101792
ANGPTL2	0	0	0	0	0	0	0	0	0	0	3.1641	2.26734	17.8291	1.21403	70.7253	6.93538
ANGPTL3	0	0	0	0	0	0	0	0	0	0	1.86175	1.86175	0	0	0	0
ANGPTL4	56.2642	56.2642	0.993663	0.993663	77.8456	51.2161	0	0	272.315	189.842	5.0243	5.0243	6.19384	0.565217	6.75259	0.823422
ANGPTL5	0	0	0	0	1.48183	1.48183	0	0	0	0	0	0	0	0	0.0920382	0.0126326
ANGPTL6	0.383989	0.383989	10.4444	7.81842	0	0	35.0592	35.0592	0	0	12.5329	12.5329	0.0453796	0.0116232	0.0577652	0.00357
ANGPTL7	0.06368	0.06368	0	0	0	0	0	0	0	0	0.77892	0.77892	0	0	0	0
ANHX	0	0	0	0	0	0	0	0	0	0	0	0	0	0	0	0
ANK1	0	0	0	0	0.100211	0.0696338	0.282801	0.282801	0	0	0	0	0.197621	0.0222003	0.222802	0.00360247
ANK2	0.941691	0.941691	0	0	0	0	0	0	0	0	0.683744	0.372134	1.51514	0.0187498	1.80177	0.108613
ANK3	49.3217	45.8677	22.6174	15.0297	5.12678	1.67415	0.0291905	0.0291905	11.4221	11.383	68.0877	25.4738	0.0496705	0.00472496	0.079156	0.0138241
ANKAR	0.18562	0.130317	0.00934941	0.00934941	0.450855	0.306106	0	0	0	0	3.71046	2.24728	0.102948	0.00680442	0.135863	0.00628178
ANKDD1A	3.10784	2.40113	0.137968	0.0876818	0.571637	0.327026	0.151242	0.151242	1.53387	0.98903	11.3372	3.6946	1.55785	0.109356	1.56972	0.145838
ANKDD1B	0	0	0	0	0	0	0	0	0	0	0.986494	0.986494	0.133752	0.015618	0.189706	0.0251197
ANKEF1	0	0	0.0354132	0.0354132	0.00820635	0.00820635	0	0	0	0	0.0882177	0.0882177	0.429539	0.0660402	0.21651	0.017417
ANKFN1	0	0	0.469607	0.36793	3.41918	3.41918	0	0	0	0	4.53724	2.51454	0.00566457	0.00253368	0.0143703	0.00664408
ANKFY1	0.955427	0.955427	2.99768	1.31879	13.6755	7.93419	0	0	27.184	26.5568	25.0074	2.13424	21.5796	1.24875	18.0106	0.381731
ANKH	17.181	11.6343	8.89291	2.54771	9.08314	3.06569	0.320382	0.320382	0	0	5.83794	4.44187	36.3943	1.0543	61.8203	9.47812
ANKHD1	37.8107	20.7685	53.8864	29.0572	61.9227	18.4432	9.59239	8.69613	26.542	14.9825	97.2341	2.8269	0.188246	0.0109562	0.145926	0.0176923
ANKHD1-EIF4EBP3	7.66456	7.37303	8.4118	7.00704	7.55745	4.83618	0.00201494	0.00201494	2.74063	2.53267	28.1352	16.6087	0.0124552	0.00111309	0.00647476	0.000654916
ANKIB1	17.8781	17.3069	7.01318	3.57264	2.68743	1.34394	2.37968	1.20476	20.413	13.4365	10.8881	3.68452	54.5193	1.28271	64.8668	0.517219
ANKK1	0	0	0	0	0	0	0	0	0	0	0	0	0.0065595	0.00262721	0.00215052	0.00147123
ANKLE1	2.44191e-06	2.44191e-06	2.31993	2.20963	0.0435395	0.0435391	0	0	0.912587	0.912587	0	0	0.429238	0.0309362	0.108825	0.00513633
ANKLE2	4.74924	2.94105	44.1011	17.2146	7.37537	3.05936	0.827758	0.827758	14.9741	8.79715	18.1769	1.01279	42.7521	1.20596	29.3866	1.60612
ANKMY1	0	0	16.3187	16.3187	4.31045	2.95302	0	0	0	0	28.0485	23.8311	1.11958	0.048197	0.763988	0.00926247
ANKMY2	2.37388	2.0065	3.90019	2.61868	1.57186	0.879787	0	0	1.0441	1.0441	6.27285	0.178595	13.2553	0.261731	8.9546	0.439081
ANKRA2	15.2176	12.8667	12.2185	8.95346	6.45215	2.48926	0.281012	0.281012	16.1161	16.1161	4.24771	0.485816	19.3581	0.557397	36.8955	0.96181
ANKRD1	0.103396	0.103396	30.1648	26.4739	5.54827	4.16747	0	0	0	0	0.140291	0.0813921	62.1465	11.9414	5.42817	0.476006
ANKRD10	253.649	87.285	216.123	58.2051	240.675	94.0225	13.0672	12.3794	375.874	85.4611	16.9079	4.30306	59.1793	2.25531	71.2014	0.965983
ANKRD11	63.2154	27.8412	90.326	19.6002	86.3067	15.1305	26.4687	26.4687	16.3939	9.24561	23.9395	2.86868	46.9149	0.24547	51.5416	1.93104
ANKRD12	178.479	118.102	41.8345	20.6985	11.2818	4.76944	22.2551	10.722	24.2631	13.0466	51.3494	11.3408	8.37346	0.14918	6.32806	0.0885577
ANKRD13A	4.58492	3.92901	10.5308	4.75059	6.76776	2.69573	0.955282	0.838883	180.605	69.4255	72.0039	39.6508	142.634	3.58552	36.7371	0.501892
ANKRD13B	0	0	0	0	0	0	0	0	0.210158	0.210158	0	0	2.846	0.153895	4.3104	0.112084
ANKRD13C	20.195	19.865	1.34386	0.673564	1.43761	0.752576	0.0453349	0.0453349	6.26906	6.24414	3.88805	0.145816	31.0134	1.00638	36.6998	0.397998
ANKRD13D	0.858858	0.858838	1.59238	0.914638	17.1989	13.0269	13.3846	6.70349	24.9311	18.5969	7.55472	4.7113	14.2888	0.175427	13.5246	0.189816
ANKRD16	0.5437	0.378229	0.50928	0.34686	0.306559	0.167029	0	0	0.923235	0.798086	0	0	2.74481	0.0753016	3.13123	0.0973622
ANKRD17	4.72499	2.38306	20.4188	4.8613	13.8968	4.15084	0	0	0.778248	0.300671	29.6142	4.18473	7.08373	0.148242	7.73434	0.205332
ANKRD18A	0	0	0	0	0	0	2.9059	2.9059	4.91887	2.65607	1.96027	1.52052	0.00587455	0.00401524	0.00299843	0.0020513
ANKRD18B	0	0	0	0	0	0	0	0	0	0	0.0646702	0.0646702	0.210159	0.0221557	0.00773737	0.00282069
ANKRD18DP	0	0	0	0	0	0	0	0	0	0	0	0	0	0	0	0
ANKRD19P	15.0899	9.67504	4.10661	1.08117	2.57988	0.711585	7.81609	6.80187	0.890333	0.661757	1.00206	1.00206	0	0	0	0
ANKRD2	0	0	0	0	0	0	0	0	0	0	0	0	0.814818	0.0316996	0.403077	0.0185771
ANKRD20A1	0	0	0.0164015	0.016361	2.79407e-06	2.7361e-06	0	0	0	0	0.226843	0.0603092	0	0	0	0
ANKRD20A11P	0	0	0	0	2.68138	1.24979	0	0	0	0	6.55904	5.80856	0	0	0	0
ANKRD20A19P	0.0302942	0.0302942	0.000121377	0.000121377	0.0456395	0.0318663	0	0	0	0	0	0	0	0	0	0
ANKRD20A2	0	0	0.000392726	0.00037295	0.00417854	0.00402989	0	0	0	0	0.11793	0.0313769	0	0	0	0
ANKRD20A4	0	0	0.0101582	0.00705532	0.0126049	0.00891897	0	0	0	0	0.00410414	0.00410381	0.00104867	0.000715997	0.0010465	0.000713866
ANKRD20A5P	0.0439174	0.0304132	0.947882	0.649092	1.17225	0.565967	0	0	0	0	7.02035	4.20297	0	0	0	0
ANKRD20A8P	0.0244326	0.0244326	0	0	1.26444e-08	1.26444e-08	0	0	0	0	8.08271e-06	8.08271e-06	0	0	0	0
ANKRD20A9P	0.153671	0.0466263	0.423574	0.121421	0.532016	0.146125	0.323974	0.323967	0.557222	0.235384	0.737839	0.55554	0	0	0	0
ANKRD22	0.0226236	0.0226236	0	0	0	0	12.9612	12.9612	0	0	0.254576	0.254576	0.0417924	0.0285178	0.0846025	0.0383094
ANKRD23	6.4517	6.4517	0.101902	0.101902	0.867628	0.649163	0	0	1.23558	1.23558	0	0	0.183198	0.0084578	0.126312	0.0173201
ANKRD24	0	0	0	0	0	0	0	0	15.9234	9.38049	3.59427	3.59427	0.0125551	0.00254848	0.0759448	0.0188692
ANKRD26	5.89373	3.57116	2.4808	1.43174	1.88292	0.621903	3.08919	3.08919	3.65063	3.65063	2.49553	0.350792	7.67723	0.285618	5.44889	0.287116
ANKRD26P1	0.041029	0.041029	0	0	0	0	0	0	0	0	0.152827	0.152827	0	0	0	0
ANKRD26P3	0	0	0	0	0	0	0	0	0	0	0	0	0	0	0	0
ANKRD27	4.90248	4.32527	24.2855	8.87054	14.9334	7.13348	0	0	23.1543	21.0262	19.3504	7.0532	19.5625	0.19807	18.0479	0.217337
ANKRD28	3.89216	3.06804	5.60066	2.34087	10.9005	4.58112	3.70539	3.57371	30.492	21.3288	8.78442	0.0972122	68.4614	5.57504	60.8648	4.24121
ANKRD29	0	0	0	0	0	0	0	0	0	0	0	0	0.532305	0.110767	2.81418	0.185226
ANKRD30A	0	0	0.299603	0.299603	0.236581	0.236581	0	0	0	0	0.0736974	0.0736974	0	0	0.0020566	0.000637366
ANKRD30B	5.71219	5.71219	0.00607461	0.00607461	0.0878306	0.0878306	0	0	0	0	0	0	0.0247751	0.00288302	0.0157478	0.00518
ANKRD30BL	6.11737e-05	6.11737e-05	0	0	1.25231e-06	1.25231e-06	0	0	0	0	0	0	0	0	0.00691491	0.00471699
ANKRD30BP2	0.303088	0.178872	0.0713313	0.0481849	0.139118	0.0781956	0	0	0	0	0.0855398	0.0855398	0	0	0	0
ANKRD30BP3	0.0441784	0.0441243	0.0286878	0.0160465	0.00762078	0.00762078	0	0	0	0	0	0	0	0	0	0
ANKRD31	0	0	0	0	0	0	0	0	0	0	0.049381	0.049381	0.0103501	0.00213504	0.0099228	0.00247559
ANKRD32	4.81915	3.3578	4.02376	2.10397	3.17124	1.46948	0	0	3.6061	3.6061	1.35771	0.0116567	16.5792	0.856553	5.16916	0.199003
ANKRD33	0	0	0	0	0	0	0	0	0	0	8.40789	5.06359	0.00763716	0.00279692	0.00782468	0.00297836
ANKRD33B	0.198222	0.198222	4.77688	2.88817	7.26567	5.81959	0	0	0	0	0.0845867	0.0845867	0.274485	0.0129687	0.897469	0.023368
ANKRD34B	0.0289526	0.0289526	0	0	0	0	0	0	0	0	0	0	0	0	0.0204873	0.00385844
ANKRD34C	0	0	0	0	0	0	0	0	0	0	0	0	0.00257555	0.001152	0	0
ANKRD35	0	0	0	0	0	0	0	0	0	0	0	0	0.0223385	0.00401095	0.0124246	0.0021918
ANKRD36	1.5931	1.1609	13.737	6.52217	7.96733	3.55052	8.04871	6.09148	22.4657	15.0283	12.2386	2.23292	0.37086	0.0304577	0.104492	0.00422878
ANKRD36B	4.60433	2.92567	24.1463	13.1837	73.568	52.9735	7.87571	5.74306	34.3652	18.9298	10.0402	3.43543	0.213708	0.0182771	0.0478429	0.00333366
ANKRD36BP1	0	0	5.07686	3.27556	1.39318	0.589724	2.86872	2.46878	0	0	7.33088	2.73331	0	0	0	0
ANKRD36BP2	0	0	0.0102204	0.0102204	0.0189832	0.0189832	0	0	0	0	1.10092	0.929435	0	0	0	0
ANKRD36C	0.352124	0.340915	0.792584	0.553963	1.35209	1.22498	4.62986	4.62985	0.00575368	0.0057526	0.566559	0.324528	0.490927	0.0283832	0.0959179	0.00922257
ANKRD37	22.5652	12.4663	81.6951	42.942	92.6368	39.8729	16.4165	14.5817	143.204	73.9585	31.2755	31.2755	15.2382	3.3293	21.1729	1.19157
ANKRD39	60.5154	60.5154	32.7768	18.101	104.753	44.0446	0	0	7.63969	4.54458	1.38337	1.38337	5.51681	0.124081	4.09287	0.0649834
ANKRD40	12.8211	6.18214	36.8757	6.2686	31.4976	6.27675	15.7814	15.7814	33.2397	13.0704	8.31906	3.35268	137.208	3.23962	80.0653	0.462603
ANKRD42	0.672382	0.668882	13.3356	12.6245	0.290334	0.248832	0	0	2.56296	2.36541	3.46045	0.175188	5.36447	0.170524	9.26613	0.20893
ANKRD44	4.93419	3.22969	23.2273	10.0632	8.90609	4.13913	2.40214	2.40214	0.967676	0.967676	23.5429	3.27899	1.23443	0.102289	0.456184	0.0491826
ANKRD44-IT1	0	0	0	0	0	0	0	0	0	0	0.984382	0.984382	0	0	0	0
ANKRD45	0.125187	0.125187	0.0242319	0.0242319	0.0712844	0.0333126	0	0	0	0	0	0	0.0652386	0.0292873	0.0822484	0.0220575
ANKRD46	0.278476	0.227074	11.7703	6.3498	2.67471	1.40272	0.060995	0.060995	0	0	20.3682	1.45189	12.1441	0.838009	17.1596	0.597368
ANKRD49	3.93061	3.49685	3.31997	1.33402	4.78587	2.40502	0	0	0.797204	0.797204	15.9015	3.45706	19.2167	0.327426	20.5587	0.26575
ANKRD50	3.6077	2.03071	0.313427	0.139582	1.29444	1.06302	0.227225	0.166722	27.5494	15.6217	28.2429	2.04935	2.99238	0.0425016	2.88379	0.0523654
ANKRD52	0.0118861	0.00831113	0.0199127	0.013918	0.0479418	0.0248842	0	0	0.764003	0.764003	4.78816	2.72516	186.787	7.92273	119.858	2.14438
ANKRD53	0	0	0	0	5.44768	5.44768	0	0	0	0	7.4135	7.4135	0.231206	0.0521287	0.224479	0.0195596
ANKRD54	26.3835	14.8689	37.573	17.9406	3.29314	2.55451	0	0	0	0	4.81862	4.81862	48.7268	1.35895	28.5908	0.614202
ANKRD55	0.196838	0.16401	38.0556	18.4051	14.4021	6.44038	0	0	0	0	9.44554	6.2382	0.172927	0.0745375	0.0991033	0.0300477
ANKRD6	0.0914737	0.047676	2.3325	1.83272	2.21835	1.31195	0	0	17.2897	8.38746	2.17943	0.439836	0.305026	0.111671	0.195317	0.0626935
ANKRD61	0	0	0	0	0	0	0	0	0	0	8.04225	8.04225	0.0688583	0.0163867	0.0325523	0.0088336
ANKRD62	0.0653911	0.0653911	0.19201	0.109724	0.0883144	0.0485855	0	0	0	0	0.0650758	0.0650758	0.00212769	0.00145427	0	0
ANKRD62P1-PARP4P3	0	0	0.140033	0.140033	0.34228	0.34228	0	0	0.202166	0.202166	0.183427	0.183427	0	0	0	0
ANKRD63	0	0	0	0	0	0	0	0	0	0	0	0	0.0117869	0.00432243	0.00537276	0.00361248
ANKRD65	0.854789	0.78817	50.9069	32.1635	25.4366	22.1383	0	0	0	0	3.80047	1.24133	0.99525	0.0558441	0.686687	0.0738953
ANKRD66	0	0	0	0	0	0	0	0	0	0	0	0	0	0	0	0
ANKRD7	0	0	0	0	0	0	0	0	0	0	0	0	0.354547	0.0817665	0.094966	0.0195365
ANKRD9	19.0831	19.0831	14.1078	14.1078	7.57282	5.58694	0	0	0	0	44.4773	44.4773	23.0064	0.580686	14.8648	0.549651
ANKS1A	5.56122	5.17472	20.4054	6.83979	4.22675	3.55076	0	0	2.45188	2.26269	28.2299	9.41701	5.27449	0.0513597	6.60629	0.180979
ANKS1B	0	0	0.266132	0.251204	2.6401	1.74857	0	0	0.100475	0.100475	0.399201	0.399201	0.0218182	0.00487004	0.180022	0.0377911
ANKS3	10.6216	8.13152	0.937562	0.832591	0.621618	0.301911	2.35933e-05	2.35933e-05	5.1706	4.76499	11.1086	11.1086	9.42046	0.135739	10.0556	0.596355
ANKS4B	0.420303	0.338355	0.0830207	0.0326146	0.0242042	0.0167981	0	0	0.0360052	0.0360052	0	0	0.0019486	0.00133044	0.00644782	0.00247185
ANKS6	0.371957	0.371957	7.38379	5.0764	2.18977	1.16096	0	0	4.70284	4.70284	4.6122	3.3322	3.80101	0.010825	2.88186	0.058971
ANKUB1	0	0	0	0	0	0	0	0	0	0	0	0	0	0	0.00361932	0.00248339
ANKZF1	37.4937	37.4155	26.2869	12.492	3.87786	2.91024	0	0	0.251613	0.179066	3.89211	2.37599	12.749	0.289642	15.3945	0.248836
ANLN	0.0462101	0.0462101	3.8449	2.22939	6.26467	3.7394	14.8244	14.8244	0.871367	0.871367	7.09684	5.19877	298.438	11.0148	4.15308	0.445219
ANO1	0	0	0.14991	0.14991	0.721313	0.721313	0	0	0	0	10.2153	5.64765	0.159361	0.0622247	0.0783496	0.030452
ANO1-AS2	0	0	0	0	0	0	0	0	0	0	0	0	0	0	0	0
ANO10	26.8047	24.4129	13.0931	7.73674	2.14202	1.28073	0	0	19.9456	12.9854	5.45757	4.16319	78.211	2.57368	83.2935	2.00983
ANO2	1.05492	0.611165	1.47284	0.937082	9.16063	8.39126	0	0	0	0	39.2292	19.4232	0.00426665	0.00291143	0.00977393	0.00667369
ANO3	0	0	0	0	0	0	0	0	0	0	0	0	0.081368	0.0133422	0.199295	0.0312764
ANO4	0	0	0	0	0	0	0	0	1.39781	1.39781	0	0	5.67032	0.20855	2.48861	0.205153
ANO5	0	0	0	0	0	0	0	0	0	0	0	0	0.011897	0.00534482	0.0225667	0.00878065
ANO6	14.2945	10.2526	26.3663	10.8481	9.93797	2.32666	3.15016	1.27782	6.11101	3.90237	17.2311	1.75876	27.6152	1.18673	16.0096	0.433895
ANO7	0	0	0	0	0	0	0	0	0	0	0	0	0.326443	0.0158356	0.774326	0.0431915
ANO8	10.709	9.91202	0.11075	0.11075	4.63579	2.67142	0	0	0	0	0.917025	0.917025	1.69594	0.0985475	1.84652	0.030653
ANO9	0	0	0	0	0	0	0	0	0	0	0.801141	0.801141	0.00519403	0.00151048	0.0013657	0.000934312
ANP32A	16.5231	10.7275	60.1771	23.8554	19.0867	5.02151	23.3501	20.5038	0.874622	0.52127	76.9431	0.80967	197.55	4.12755	124.07	1.45844
ANP32AP1	0	0	0	0	0	0	0	0	0	0	1.11677	1.11677	0	0	0	0
ANP32B	714.472	355.221	128.087	72.3738	48.2828	19.9633	63.8024	45.6771	7.76155	2.56372	12.3121	0.81088	320.103	10.2898	132.701	2.06224
ANP32C	0	0	0	0	0	0	0	0	0	0	0	0	0	0	0	0
ANP32D	0	0	0	0	0	0	0	0	0	0	0	0	0	0	0	0
ANP32E	22.5173	9.71007	48.9581	13.2051	65.6053	9.61821	288.944	129.104	37.6105	17.1802	4.08525	0.216843	172.005	2.06781	46.1059	1.08069
ANPEP	0	0	7.91954	5.35744	4.98534	3.71565	128.176	128.176	1.21891	1.21891	11.6757	2.03821	323.224	22.6123	68.6891	2.76888
ANTXR1	0	0	1.17637	1.17637	0	0	0	0	8.84078	4.06254	20.3784	7.65637	269.239	3.71434	1433.11	42.1902
ANTXR2	3.92888	1.77786	12.4467	5.26057	3.84806	1.42148	0.525786	0.275401	3.3015	1.44262	43.1924	18.8233	156.063	19.3398	151.869	2.3805
ANTXRLP1	0	0	0	0	0	0	0	0	0	0	0.773703	0.773703	0	0	0	0
ANXA1	1181	323.137	776.266	151.131	964.453	187.056	805.563	594.742	977.961	342.972	128.815	52.1275	886.883	24.3055	568.345	24.8515
ANXA10	0	0	0	0	0	0	0	0	0	0	0	0	0.0763996	0.0101266	0.154035	0.0269646
ANXA11	135.591	64.3822	202.158	68.7809	67.5069	18.5142	14.5248	13.8349	7.38358	7.11588	42.4513	22.3718	54.2587	0.528993	66.4686	2.12189
ANXA13	0	0	0	0	0	0	0	0	0	0	0	0	0	0	0.114176	0.0331369
ANXA2	740.782	149.545	1172.22	108.147	1251.86	100.381	368.933	327.066	1076.85	400.13	385.433	12.1804	2696.01	23.1237	1029.8	30.5698
ANXA2P1	0.0632447	0.0521266	0.366095	0.153843	0.350861	0.149554	0	0	1.86567	1.21799	0	0	0	0	0	0
ANXA2P3	0.0189355	0.0189355	0	0	0.0414357	0.0414357	0	0	0	0	0	0	0	0	0	0
ANXA2R	0	0	0	0	0.0795067	0.0795067	0	0	0	0	0	0	0.425409	0.0124227	0.271754	0.0248836
ANXA3	128.907	76.249	228.891	86.9792	272.588	86.4249	3.45328	3.45328	178.88	59.0395	18.0034	4.52525	39.1303	3.23436	3.33412	0.126337
ANXA4	108.53	93.1605	45.9574	19.356	20.0505	7.33379	16.3033	16.3033	246.305	110.302	20.4733	9.29209	109.711	1.13869	121.645	2.63673
ANXA5	1158.5	355.183	998.13	169.717	959.176	96.5952	167.532	113.35	701.731	186.297	340.908	97.6761	1220.21	7.86221	704.95	15.0348
ANXA6	11.0646	4.31443	16.2697	6.56105	19.9421	13.6167	0.261168	0.261168	7.67959	7.67959	52.375	12.9711	314.188	13.5276	202.7	11.9014
ANXA7	48.6346	20.8224	85.7857	16.0203	91.8064	31.2558	63.3547	52.4603	31.915	19.7389	64.1912	9.17623	94.3161	2.11113	73.3895	0.344665
ANXA8	380.062	175.162	955.608	187.697	1138.05	177.5	9.78067	9.54583	105.713	70.2732	8.77379	1.10061	0	0	0	0
ANXA8L1	86.8893	51.3703	84.4378	29.0887	32.49	9.87951	0.00403988	0.0040395	9.92024	4.08918	4.97853	4.89369	0.0793372	0.0159432	0.0099325	0.00480775
ANXA9	0	0	0.132165	0.132165	0	0	0	0	0	0	0	0	0.0627669	0.0114596	0.167942	0.012242
AOAH	26.3783	23.3438	0.0621418	0.0436405	0	0	65.0662	35.0362	0	0	10.1425	3.0525	0.00536453	0.00366271	0	0
AOAH-IT1	0	0	0	0	0	0	0	0	0	0	0	0	0	0	0	0
AOC1	2.40966	1.51723	0.520929	0.434358	0.0440771	0.0298429	0	0	8056.04	1362.79	24.009	10.9968	0	0	0	0
AOC2	0	0	0	0	0	0	0	0	0.899021	0.639652	0.28198	0.28198	0.187056	0.0109141	0.139927	0.0154215
AOC3	0	0	0.024119	0.024119	0	0	0	0	0	0	1.59099	1.12634	0.117219	0.028937	0.121663	0.0241088
AOC4P	0	0	0	0	0	0	0	0	0	0	0	0	0	0	0	0
AOX1	0	0	0.00585122	0.00585122	0	0	0	0	0	0	0.0698203	0.0698203	26.9884	0.834491	6.08827	0.554366
AOX2P	0	0	0	0	0	0	0	0	0	0	0.0671909	0.0671909	0	0	0	0
AP000289.6	0	0	0	0	0	0	0	0	0	0	0	0	0	0	0	0
AP000469.2	0	0	0	0	0	0	0	0	0	0	0	0	0	0	0	0
AP000472.2	0	0	0	0	0	0	0	0	0	0	0	0	0	0	0	0
AP000479.1	0	0	0	0	0	0	0	0	0	0	0	0	0	0	0	0
AP000688.14	1.29684	1.29684	37.3764	9.69607	47.612	14.9054	0	0	0	0	0	0	0	0	0	0
AP001258.4	0.11615	0.11615	2.99636	2.98689	0.497822	0.451489	0	0	0	0	3.911	0.832068	0	0	0	0
AP003025.2	0	0	0	0	0	0	0	0	0	0	0	0	0	0	0	0
AP1AR	3.45152	3.06732	1.63057	1.33083	1.62155	0.759447	0	0	0	0	6.21033	2.01832	46.6837	0.966894	47.1752	1.33076
AP1B1	35.4054	18.6418	30.881	13.7246	33.731	13.3414	3.05885	1.94594	3.6047	3.6047	27.4397	11.2125	14.5875	0.147857	11.124	0.298033
AP1B1P1	0	0	0	0	0	0	0	0	0	0	0	0	0	0	0	0
AP1G1	20.3678	10.9081	4.99542	1.95854	16.0188	7.67277	44.0619	34.024	8.26021	4.57225	8.10197	0.565555	66.9826	0.220728	74.1965	0.406166
AP1G2	18.8883	11.9159	75.6674	52.5074	186.773	70.3562	0	0	75.8262	75.0515	35.201	22.3667	8.68363	0.66077	6.32765	0.111331
AP1M1	0.642339	0.460914	14.8938	7.04201	53.4009	24.2785	0	0	17.8995	12.0407	9.33943	1.61788	154.985	0.769225	108.036	1.51126
AP1M2	10.1883	6.40155	100.243	39.7427	107.673	39.0428	0	0	95.8144	93.8217	9.50765	4.51785	11.3927	0.615607	1.91299	0.108615
AP1S1	0	0	3.88321	3.17636	1.4155	1.05854	0	0	1.13267	1.13267	0.726251	0.726251	224.121	1.11251	146.685	3.02398
AP1S2	0	0	0.0410642	0.0410642	0.483813	0.349812	46.0593	26.7878	0.529832	0.529832	2.90143	0.788855	236.324	17.0317	68.7857	3.01491
AP1S3	29.5909	14.2038	54.6666	51.628	6.21182	3.33938	0.839833	0.839833	7.49458	7.12656	1.82981	1.82981	8.82664	1.42322	4.46431	0.467122
AP2A1	45.1109	35.6752	59.7291	26.4034	42.8471	18.0784	5.60602	5.60602	9.13404	6.79522	4.8624	2.6197	23.0847	0.324963	18.4468	0.152925
AP2A2	47.9097	26.6702	11.3906	2.97026	60.8179	34.5366	0	0	51.7083	25	28.1393	3.06449	80.5318	2.48807	67.1529	3.32086
AP2B1	0.591837	0.405752	6.51531	3.60316	4.67178	1.67844	0	0	3.18679	2.09798	3.83684	0.060575	122.875	2.5819	124.699	2.64662
AP2M1	487.501	190.112	602.476	133.455	408.06	59.9584	441.476	367.03	33.2804	19.5652	350.033	102.61	765.722	2.23652	524.613	3.49617
AP2S1	185.258	91.751	576.904	140.736	477.743	94.6319	262.724	262.724	117.889	65.4405	12.7109	0.0760995	308.307	2.38433	233.156	2.13081
AP3B1	3.85752	2.67152	13.1814	5.07039	16.9375	4.87572	0.220084	0.132516	25.8429	13.3263	7.5193	0.339157	36.088	0.858534	38.3747	0.815986
AP3B2	0	0	0	0	0	0	0	0	0	0	0	0	0.0300532	0.00201658	0.0952249	0.013362
AP3D1	58.2634	26.8212	66.3377	23.0601	41.6441	18.449	23.8268	22.6488	14.3613	7.10924	76.2992	10.8913	66.2608	1.20954	63.2419	5.25868
AP3M1	14.8724	8.98291	9.57449	3.51457	38.8088	7.80544	1.19101	0.521497	5.32976	2.69055	17.3791	6.14754	53.1161	1.20484	51.775	0.323356
AP3M2	3.35601	3.08176	5.80002	2.83667	3.48869	2.24812	0.759353	0.66251	0	0	0.115865	0.115865	39.0307	2.64062	23.6131	1.04711
AP3S1	10.2449	10.2449	9.501	3.57785	5.2922	1.91509	1.39548	1.39548	137.844	51.3538	96.7967	20.0203	206.953	0.85077	145.517	4.83893
AP3S2	0.413914	0.30925	9.26139	3.70617	14.7936	4.6422	0.740516	0.740516	1.3435	1.07696	0.21006	0.0868146	57.1039	3.38632	74.9418	1.29931
AP4B1	1.03456	0.851787	11.3207	11.2338	13.8457	9.52451	0	0	0	0	2.03601	1.48669	7.73454	0.426467	4.85851	0.142431
AP4B1-AS1	0	0	0.149952	0.0740817	0.416325	0.192128	0	0	0	0	1.91974	1.91974	0	0	0	0
AP4E1	10.4475	8.63095	2.8358	1.34525	1.87587	0.708199	0.0332644	0.0332644	0.109488	0.078878	5.64331	2.81806	4.33248	0.0875627	2.80381	0.0232173
AP4M1	1.81537	1.2773	1.7836	1.76989	0.743146	0.536776	5.39452	5.39452	5.20867e-05	5.20867e-05	0	0	12.2515	1.09256	11.0261	0.283811
AP4S1	3.18574	2.80604	0.662165	0.52822	1.78389	0.96059	0.0939037	0.0939037	0.0345509	0.0342263	0.908459	0.58732	9.1997	0.733955	7.09578	0.281737
AP5B1	3.14477	1.84562	1.82757	1.17408	2.8276	1.30663	0	0	2.95749	1.83284	0.942764	0.480677	1.08166	0.0620166	1.08237	0.0456667
AP5M1	0.219232	0.195445	5.16249	3.60091	7.51321	3.12565	1.15839	1.15839	0.22976	0.155369	22.4002	14.618	41.1946	0.61169	52.9769	0.749523
AP5S1	0	0	210.809	62.4186	111.726	41.218	0	0	42.3484	26.698	0	0	16.3403	0.160552	11.924	0.224873
AP5Z1	5.76228	3.62492	4.22059	2.37944	2.0163	1.22389	29.6327	25.7376	0	0	2.16299	1.56743	10.4279	0.283768	8.96206	0.182062
APAF1	0.186361	0.186332	0.561645	0.488105	1.84146	1.19708	0.012712	0.012712	0	0	1.17702	0.300726	4.55202	0.0378938	4.11718	0.082657
APBA1	0.0501936	0.0354121	1.85358	1.78642	0.136582	0.136582	0	0	6.17985	6.17985	0.682026	0.15196	2.04349	0.11876	0.485399	0.0349074
APBA2	0.189978	0.189978	0	0	3.89302e-06	3.89302e-06	0	0	0	0	0	0	4.91507	0.108327	3.35119	0.258693
APBA3	1.62916	1.62916	0	0	0	0	0	0	0	0	0	0	9.09835	0.903328	10.2935	0.884415
APBB1	0	0	0	0	0.0741291	0.0741291	0	0	0	0	0.816822	0.816822	12.9016	0.248322	16.9238	0.243078
APBB1IP	0.120343	0.120343	1.16176	0.869266	0	0	68.3898	59.2656	0	0	5.3044	4.18488	8.18443	1.7764	6.47542	0.927891
APBB2	4.78951	3.37089	3.93664	2.18401	2.45033	1.81871	0.868943	0.868943	0.397987	0.239611	9.46289	2.582	73.5191	0.394825	75.2387	2.56913
APBB3	0.172003	0.172003	15.0701	10.9021	1.7576	1.15488	0	0	5.1253	5.1253	4.71402	4.71402	4.55348	0.0895786	10.1632	0.158518
APC	3.07832	2.38018	1.30832	0.51065	1.57477	0.991198	12.6236	12.6236	12.6344	8.09634	10.2649	2.08318	6.01244	0.191714	3.94773	0.06591
APC2	0.101863	0.101863	0.155253	0.155253	0.232386	0.198176	0	0	0	0	0	0	0.0437244	0.00626627	0.0469762	0.00166583
APCDD1	0.378524	0.378524	9.81535	5.84979	21.9673	18.3897	0	0	0.434765	0.434765	19.2998	18.0911	1.25415	0.172859	5.84637	1.85367
APCDD1L	0	0	0	0	0	0	0	0	0	0	0	0	49.1489	8.9017	3.29112	1.01457
APCDD1L-AS1	0	0	0	0	0	0	0	0	0	0	0	0	0	0	0	0
APCS	0	0	0	0	0	0	0	0	0	0	0	0	0	0	0	0
APEH	3.34442	2.26263	37.882	21.0923	56.1623	20.6027	26.3272	15.2198	22.5954	22.0485	3.16515	1.82433	32.574	1.53206	32.2843	1.19577
APELA	0	0	0.975632	0.975632	0	0	0	0	0	0	0	0	0	0	0	0
APEX1	0.457811	0.342126	62.6841	20.1641	144.893	40.0332	98.6635	58.3111	36.4876	34.1558	65.3371	1.7458	167.376	2.1248	112.675	1.88772
APEX2	7.62319	3.87875	101.549	38.9854	23.2315	13.8877	6.39063	6.39063	2.09915	2.09915	33.3686	8.55212	10.8741	0.27907	6.27382	0.0987337
APH1A	0.13568	0.13568	23.5745	19.2741	1.7158	1.45114	0	0	6.81415	6.81415	0.496136	0.496136	6.33278	0.115939	2.62884	0.129297
APH1B	0	0	0.00863758	0.00611151	0.668447	0.36495	0	0	15.7209	14.66	2.24548	2.08355	32.9027	2.99627	71.3326	2.2721
API5	3.18159	2.09889	15.3807	6.32374	13.6388	4.75826	14.1725	14.0465	0	0	18.4531	1.85896	139.744	5.74133	120.229	1.52855
APIP	7.32625	4.26163	24.2124	14.1023	10.1866	3.19005	10.6178	10.2603	0	0	1.63506	1.44882	28.6441	0.623234	19.3001	0.284617
APITD1	1.1161	0.680237	15.5522	7.84787	11.7299	5.92539	0.123079	0.123079	0	0	0	0	33.0773	0.60592	13.6457	0.510838
APITD1-CORT	0.889598	0.889598	5.05601	4.76088	1.89165	1.11688	0.610836	0.610836	0	0	0	0	0	0	0	0
APLF	0.175411	0.149156	1.28606	1.27672	0	0	2.54288	2.54288	0	0	10.7381	2.49489	1.31035	0.0519897	1.23002	0.0510938
APLN	0	0	0	0	0	0	0	0	0	0	2.80056	2.44026	0.984234	0.15013	0.537776	0.189634
APLNR	0	0	0	0	0	0	0	0	0	0	17.6102	10.0112	0	0	0	0
APLP1	0	0	0	0	0	0	0	0	0	0	0	0	5.66675	0.356065	5.2188	0.0827385
APLP2	778.16	311.302	364.794	55.8062	346.014	52.0635	173.255	85.9563	54.7003	24.9577	203.99	120.075	601.359	7.89501	519.809	12.8914
APMAP	436.338	219.245	392.131	79.7899	340.777	90.0981	112.655	82.7191	0	0	40.3249	9.2441	54.6625	1.07688	68.5359	2.10499
APOA1	0	0	0	0	0	0	0	0	0	0	0	0	0.0864125	0.0173199	0.0834552	0.0125836
APOA1BP	27.2773	19.7021	154.995	53.1908	171.341	57.1141	0	0	0	0	3.65898	3.65898	43.3717	1.30965	37.0607	1.10531
APOA2	0	0	0	0	0	0	0	0	0	0	0	0	0.0401042	0.0273818	0	0
APOA4	0	0	0	0	0	0	0	0	0	0	0	0	0	0	0.00475169	0.00335436
APOA5	0	0	0	0	0	0	0	0	0	0	0	0	0	0	0	0
APOB	0	0	0	0	0	0	0	0	0	0	0.110287	0.0519043	0	0	0.0153271	0.00165243
APOBEC1	0	0	0	0	0	0	0	0	0	0	0	0	0	0	0	0
APOBEC2	1.10474	1.10474	8.423	5.34183	0.116102	0.116102	0	0	0	0	3.96752	3.96752	0	0	0.00921501	0.00628599
APOBEC3A	5.61969	3.687	0.332796	0.229681	3.28141	1.15551	230.455	226.558	1.25702	0.86896	4.62729	4.2059	0.0360425	0.0171804	0.0403969	0.018685
APOBEC3B	0	0	11.9325	11.0936	0.175829	0.175829	7.77349e-06	7.77349e-06	0	0	0.758299	0.758299	7.86729	0.067749	0.226976	0.0204083
APOBEC3B-AS1	0	0	37.0804	36.3502	0	0	17.8913	17.8913	0	0	0	0	0	0	0	0
APOBEC3C	0	0	0	0	4.32817	4.32817	304.45	304.45	0	0	13.8	6.02016	47.9709	2.53548	49.533	1.37456
APOBEC3D	1.26391	0.892433	9.71921	4.19923	11.7879	5.85812	0	0	0.00282611	0.00282611	1.25509	1.25509	0.954138	0.0355149	1.79877	0.0580872
APOBEC3F	0.204064	0.196419	6.08434	4.21609	1.49337	0.867151	0	0	0.090351	0.0758197	0	0	4.02931	0.178376	5.72125	0.270957
APOBEC3G	0.365185	0.365185	0.0103983	0.0103978	0.317857	0.291437	0.330852	0.330852	0	0	6.88383	0.760902	2.75718	0.189197	4.43512	0.655261
APOBEC3H	0	0	0	0	0	0	0	0	0	0	0	0	0.0112474	0.00769213	0.0582599	0.0173636
APOBEC4	0	0	0	0	0	0	0	0	0	0	0	0	0	0	0	0
APOBR	0	0	0	0	0.510086	0.510086	0	0	0.617271	0.617271	0.0702729	0.0702729	0.0043882	0.00299437	0.0199972	0.00334938
APOC1	0	0	0	0	0	0	26833.8	14096.5	126.01	126.01	164.363	13.8262	2.42457	0.201932	2.53892	0.329602
APOC1P1	0.538175	0.538175	2.92334	1.46244	1.08293	0.593915	0.15629	0.15629	0	0	0	0	0	0	0	0
APOC2	0	0	0	0	0	0	0	0	0	0	0	0	0	0	0.0597904	0.0217891
APOC3	0	0	8.77201	8.77201	0	0	0	0	0	0	0	0	0	0	0	0
APOC4-APOC2	0	0	0	0	0	0	18.8046	18.8046	0	0	2.43342	1.93607	0	0	0	0
APOD	135.904	135.381	40.4389	28.8594	0.15505	0.15505	0	0	0.908026	0.908026	395.83	166.465	0.276499	0.0235733	0.908642	0.0767446
APOE	0	0	0	0	0	0	4054.32	3397.97	0	0	40.9761	3.3015	7.70309	0.401769	17.0466	0.341833
APOF	0	0	1.19416	1.19416	0.303984	0.303984	0	0	0	0	0	0	0	0	0	0
APOH	0	0	0	0	0	0	0	0	0	0	0	0	0	0	0.0124751	0.00851806
APOL1	2.44558	1.66464	18.45	8.76003	45.4403	32.5482	1.4245	1.4245	5.21886	4.82152	3.77604	1.78236	14.8574	3.89525	18.5403	1.89216
APOL2	306.125	236.469	105.673	32.7483	146.415	28.1289	42.2647	22.0835	34.7021	21.6849	3.7154	1.43852	49.2054	4.88322	33.6879	4.27257
APOL3	0.0110607	0.0110607	3.42127	2.7883	10.3182	9.7981	457.671	457.671	0	0	2.52914	2.17123	7.89182	0.462983	12.1346	0.581021
APOL4	5.89697	5.32323	0.341393	0.185154	0.161204	0.0556419	0.063579	0.063579	0.237703	0.237703	2.51291	1.10214	1.2662	0.0981204	2.69243	0.284299
APOL5	0	0	0	0	0.365665	0.365665	0	0	0	0	0	0	0.00383183	0.00261624	0.00503158	0.00343559
APOL6	4.77029	2.72853	1.28353	0.869977	9.27602	4.13533	315.531	295.455	35.8488	18.3119	3.09001	0.351052	11.2873	1.07955	13.5039	1.07694
APOLD1	0.0102445	0.00939093	0.0330703	0.0206846	0.412083	0.402734	0	0	13.7312	13.7312	6.36027	1.57759	8.03228	0.421933	2.19611	0.114257
APOM	0	0	0	0	0	0	0	0	0	0	0	0	0.0813893	0.0217271	0.150061	0.025217
APOO	10.9407	10.9407	6.96669	4.23558	6.30529	3.20416	0	0	0	0	12.5406	12.5406	18.6544	0.357959	23.094	0.939181
APOOL	0.44812	0.29456	3.58813	1.57964	3.44348	1.43169	0.181463	0.123637	4.13265	3.03918	3.63915	0.994181	9.0378	0.362263	8.25582	0.339091
APOOP5	0	0	0	0	0	0	0	0	0	0	0	0	0	0	0	0
APOPT1	40.1644	26.3447	61.1773	21.8709	93.9154	29.8883	2.84246	2.84246	18.626	11.1156	0	0	2.3191	0.242608	3.02609	0.140767
APP	33.992	10.9024	54.9282	14.4523	67.046	20.9714	2.67862	0.46636	15.3468	12.7255	192.392	13.5653	281.168	1.6799	294.589	8.74749
APPBP2	0.0655685	0.0406695	4.52387	2.60418	6.03167	2.85381	0.027169	0.027169	3.39425	2.43011	7.78163	2.5129	36.0495	0.2764	47.0031	0.704083
APPL1	0.339839	0.197034	12.9842	5.39035	2.29417	0.901721	0.0668553	0.0668553	5.3573	5.33177	5.50801	1.79591	39.2545	0.423133	28.5137	0.583468
APPL2	0.888111	0.540189	16.3842	8.08085	7.29378	2.87121	0.108099	0.108099	43.5665	27.7537	49.9512	8.24762	110.696	2.86287	72.0712	1.78032
APRT	923.912	632.033	1137.68	360.111	1498.22	332.393	1497.56	1019.01	377.42	226.237	0	0	126.062	2.55051	109.751	2.88306
APTX	0.370173	0.370173	2.95708	1.36778	11.586	5.06431	0.829032	0.829032	0.182324	0.182324	3.19896	0.802785	23.4963	0.275861	23.2231	0.0983979
AQP1	0	0	0	0	0	0	0	0	0	0	1.43566	0.114625	1.03533	0.197279	0.246174	0.037933
AQP10	0	0	0	0	0	0	0	0	0	0	0	0	0	0	0	0
AQP11	0.0575044	0.0575044	2.53618	1.25545	0.456856	0.376971	0	0	0.687379	0.687379	0.409258	0.409258	1.92014	0.115341	1.63711	0.0299798
AQP12A	0	0	0	0	0	0	0	0	0	0	0	0	0	0	0	0
AQP12B	0	0	0	0	0	0	0	0	0	0	0	0	0	0	0	0
AQP2	0	0	0	0	0	0	0	0	0	0	0	0	0	0	0.0474435	0.011849
AQP3	0	0	0.0657229	0.0657229	0	0	0	0	0	0	6.54106	1.13826	2.71671	0.0922482	0.617372	0.0630537
AQP4	0	0	0	0	0	0	0	0	0	0	0	0	0	0	0.0159932	0.0109202
AQP4-AS1	8.08467	7.45574	0.340086	0.170668	0.163101	0.0684364	0.746681	0.746681	0.24597	0.109513	0	0	0	0	0	0
AQP5	0	0	0	0	0	0	0	0	0	0	0	0	0	0	0	0
AQP6	2.43954	1.83567	0.854949	0.404027	1.85215	1.52064	0.253877	0.253877	0	0	0	0	0.0621517	0.00393057	0.0455044	0.00772052
AQP7	0	0	0	0	0	0	0	0	0	0	0	0	0	0	0.00689869	0.00471957
AQP7P1	0	0	0	0	0	0	0	0	0	0	0.21637	0.21637	0	0	0	0
AQP8	0	0	0	0	0	0	0	0	0	0	0	0	0.0134	0.00916424	0.135163	0.0183512
AQP9	0	0	0	0	0	0	41.8408	41.8408	0	0	1.16807	1.16807	0	0	0	0
AQR	1.75506	1.39164	7.15783	2.83897	11.9995	4.42794	0.0933211	0.0933211	0.536135	0.475317	19.6816	2.86286	8.05983	0.0953254	6.45145	0.133924
AR	0	0	0.0574895	0.0411276	0.27218	0.262881	0	0	0	0	0.121052	0.0699438	8.61669	0.404653	7.20489	0.120505
ARAF	159.51	155.375	38.9221	17.7137	25.4248	24.4385	0	0	2.97089	1.8193	52.6927	43.7695	43.0462	1.19827	49.5421	0.468352
ARAP1	9.74317	8.50723	42.9345	27.4125	142.785	101.991	5.77606	5.77606	1.61652	1.61652	4.70777	1.75324	20.1794	0.195321	26.4663	0.168764
ARAP2	0	0	0.0225315	0.0160569	0.01344	0.01344	150.459	134.947	21.3378	13.7621	11.9916	6.89385	1.38592	0.19062	0.332922	0.040824
ARAP3	0	0	0	0	0	0	0	0	0	0	2.22196	0.385339	1.51192	0.0203224	0.70286	0.037079
ARC	0	0	0	0	0.0725063	0.0725063	0	0	0	0	0	0	1.16765	0.217359	0.21923	0.0482874
ARCN1	17.6183	15.761	13.9721	4.87661	24.0595	11.3302	16.4506	4.81792	32.581	13.813	82.078	3.49884	98.8253	0.870064	136.173	1.50042
AREG	0	0	25.2667	19.363	8.23673	7.43506	440.041	273.636	0	0	18.2996	5.78038	0.0297505	0.0127673	0.232945	0.0959484
AREL1	1.42282	0.466392	1.40328	1.2633	6.12647	3.62786	0.2918	0.2918	2.82383	2.38749	4.83345	2.85218	48.7359	0.0657579	65.5029	1.69029
ARF1	139.615	51.0985	346.98	62.043	291.346	67.5517	63.1488	33.6095	449.506	129.079	344.435	201.763	1308.76	4.71142	1548.38	15.4108
ARF3	2.28756	2.24143	7.90957	4.07627	4.57243	2.01351	41.8747	41.8747	11.8857	8.17341	15.9068	4.3341	522.195	7.01594	450.816	8.28571
ARF4	658.973	305.5	212.776	40.2967	288.481	59.0827	31.2097	21.2598	302.745	66.1841	113.895	56.9625	1350.63	11.1172	1744.17	51.637
ARF5	187.825	126.68	334.81	154.757	160.052	42.4364	23.5607	23.5607	166.702	95.7807	2.30718	0.277297	151.749	8.80259	155.47	4.91224
ARF6	86.9496	43.1974	100.643	35.8538	138.502	32.0987	374.766	370.323	48.3122	15.0103	8.28706	0.918068	170.14	4.65115	67.3253	1.156
ARFGAP1	42.285	41.3139	75.3106	39.9825	1.9083	1.18919	25.0894	25.0894	5.81404	2.68628	2.43891	2.06819	57.5713	0.673128	83.4417	1.95896
ARFGAP2	168.464	123.484	103.994	69.3282	16.2607	5.80434	0.493755	0.493755	145.031	123.515	11.3068	7.29927	55.447	0.87798	52.4264	0.530152
ARFGAP3	7.92457	3.46574	18.1241	7.97918	21.4046	7.9231	9.96782	9.76941	43.0765	9.84426	28.6924	9.06606	36.5729	0.869202	48.2488	1.65767
ARFGEF1	13.1142	9.13674	10.4089	2.84854	22.1362	7.65724	0.0682592	0.0682592	12.6475	7.23857	26.8074	6.39864	8.87731	0.101197	9.03603	0.109546
ARFGEF2	9.76323	5.96857	7.5717	3.29255	7.77109	3.06346	0.71293	0.71293	11.7474	11.1134	10.4334	0.395863	5.05286	0.0527503	5.83348	0.115743
ARFIP1	135.375	131.857	9.68168	3.67383	15.3921	10.2412	8.54986	5.65559	13.3778	6.55426	4.27244	0.657032	80.5994	2.04651	100.1	0.27918
ARFIP2	8.00652	5.79591	18.1945	8.13991	17.6099	7.1006	0	0	7.68422	4.70682	4.541	0.98967	30.6211	0.406047	39.7241	0.246764
ARFRP1	3.27853	3.27853	24.6885	11.6268	31.7141	20.8167	21.9076	21.9076	0.00965125	0.00965125	0	0	42.3023	1.25322	33.7705	0.462034
ARG1	0	0	0	0	0	0	0	0	0	0	0	0	0	0	0	0
ARG2	10.2378	7.47318	8.97162	3.19393	18.0782	9.0971	0	0	1.10801	1.10801	6.09606	1.05927	7.41164	0.50174	5.43483	0.33869
ARGFX	6.0866	5.02907	0.0876758	0.0302828	0.167624	0.0560109	0	0	0.0801266	0.0801266	0	0	0	0	0	0
ARGFXP2	0	0	0	0	0	0	0	0	0	0	0	0	0	0	0	0
ARGLU1	614.776	282.411	113.505	22.8074	125.302	22.0194	9.65383	9.00822	206.573	92.7546	129.189	20.5419	87.3586	2.31591	53.7977	0.775432
ARHGAP1	38.1875	28.0931	165.304	38.3454	143.698	24.0776	135.657	122.186	243.245	68.8454	29.2132	9.97911	165.705	2.16849	122.378	0.894684
ARHGAP10	38.0879	21.0535	18.6476	10.9669	12.0934	6.92954	98.6721	98.5294	28.3697	23.0154	12.1319	1.58089	8.20352	0.199942	2.15056	0.0840444
ARHGAP11A	17.4723	6.83059	1.61367	0.999729	2.0279	1.63886	2.1884	1.80337	44.4173	44.3691	1.66212	0.0507685	26.4334	0.423912	1.10935	0.033284
ARHGAP11B	0.307426	0.304913	3.39796	3.3904	0.0784404	0.0542933	0	0	0.00516278	0.00516278	0	0	25.9041	0.905875	2.60128	0.141766
ARHGAP12	14.4889	9.14666	27.1446	18.5778	4.93714	1.6726	0	0	16.0729	10.9168	33.22	10.0542	4.82745	0.0254726	7.94537	0.177741
ARHGAP15	0	0	0	0	0	0	1.29597	1.29597	0	0	3.02369	0.476639	0.00863969	0.00589888	0	0
ARHGAP17	68.5527	32.821	41.436	19.2291	15.9621	7.70784	2.97044	1.57748	25.5477	13.4742	79.8782	43.3729	23.5016	0.185678	16.2632	0.34068
ARHGAP18	3.5881	1.41905	14.7825	3.90585	51.666	20.2639	16.9341	3.63846	1.22531	0.826318	13.2397	0.464187	24.8647	1.3022	4.91518	0.415058
ARHGAP19	0	0	0.216075	0.111266	6.62003	6.26018	0	0	0	0	33.9666	33.0944	16.6075	0.138957	4.56186	0.0657604
ARHGAP20	0.0143027	0.0143027	0	0	0.00395073	0.00395073	0	0	0	0	0.614672	0.0610249	0.491158	0.00465791	4.9767	0.484871
ARHGAP21	15.8917	9.08551	26.1213	8.82718	29.3601	8.97327	6.329	4.63317	22.1541	19.1453	24.6105	5.18291	42.0938	0.765467	47.2659	2.21968
ARHGAP22	0	0	9.99801	9.30104	0.156565	0.156565	0	0	0	0	0	0	23.7747	0.920909	2.6852	0.141322
ARHGAP24	91.9873	88.2077	18.5561	9.43966	15.1099	6.29052	0	0	15.2036	11.2634	199.878	0.298472	20.9911	0.502846	28.8158	0.85383
ARHGAP25	0	0	0	0	0	0	0	0	0	0	12.8318	5.13608	1.22952	0.0479894	0.630478	0.0496355
ARHGAP26	4.95346	2.95726	0.142003	0.0582682	0.516321	0.323681	1.13603	0.577431	2.8804	2.79624	53.2246	6.47478	3.60237	0.23982	2.23841	0.410669
ARHGAP26-AS1	0	0	0	0	0	0	0	0	0	0	0	0	0	0	0	0
ARHGAP27	7.1892	7.1892	0.443658	0.211426	0.859193	0.508283	0	0	0	0	4.75751	1.20693	0.165671	0.0207994	0.0238638	0.002792
ARHGAP28	0.0685429	0.0391523	2.98074	1.43374	0.788559	0.455494	0	0	0.0261937	0.0261937	2.2303	1.05218	0.884636	0.0177831	7.75027	0.696236
ARHGAP29	24.1389	19.8079	14.1915	8.39585	9.87063	3.8177	0.245791	0.245791	4.95592	3.37366	26.0479	5.94629	9.13634	1.25785	16.6184	2.50416
ARHGAP30	0	0	1.25277	1.25277	0.207928	0.207928	30.268	28.0001	0	0	6.07399	2.10804	0.00545821	0.00210984	0.000621932	0.000424249
ARHGAP31	0	0	0.546547	0.36046	0.178484	0.169495	7.32701	5.23269	0.756849	0.721897	4.17136	0.463196	4.36008	0.113571	1.92614	0.0298739
ARHGAP32	7.55548	4.15213	7.94904	2.66285	10.5152	3.41569	0.457278	0.457278	0.571186	0.520919	7.96817	1.78135	0.849365	0.0132903	0.593884	0.0258868
ARHGAP33	0	0	0	0	0	0	0	0	0	0	0	0	4.99988	0.424615	0.520547	0.0369492
ARHGAP35	0.292561	0.292561	2.74731	1.29075	2.98481	2.43309	0	0	0.261118	0.169954	8.78045	2.18607	3.8697	0.0125755	2.60828	0.075663
ARHGAP36	8.06499	8.06499	3.11764	2.41131	3.59141	2.49132	0	0	0	0	0	0	0	0	0	0
ARHGAP39	0.131265	0.131265	0.294374	0.210161	0	0	0	0	0	0	0.997236	0.997236	0.724763	0.0263697	0.794932	0.0693272
ARHGAP4	0	0	0	0	0	0	60.5306	31.4624	4.42472	4.42472	6.34665	6.34665	0.790719	0.0748115	0.775619	0.0444212
ARHGAP40	0	0	0	0	0	0	0	0	0	0	0	0	0.00312211	0.00213043	0	0
ARHGAP42	8.52059	5.89082	0.517792	0.466826	0.397598	0.253652	0	0	0	0	13.9725	2.20221	9.50804	0.703597	17.8172	0.243287
ARHGAP44	0	0	0.0270843	0.0270843	0.0339082	0.0339082	0	0	0	0	1.22567	0.912859	0.668766	0.0652246	0.331172	0.0143713
ARHGAP5	41.8888	28.039	4.60092	1.58073	6.79832	2.53168	5.23848	2.71062	7.39558	3.48855	13.8099	5.20854	9.35135	0.106971	14.6734	0.377872
ARHGAP5-AS1	0	0	3.69371	3.69371	1.66651	1.56632	0	0	0	0	0	0	0	0	0	0
ARHGAP6	0.212745	0.212745	1.49124	1.49124	1.78844	1.6386	0	0	0	0	3.12745	1.57428	0.323248	0.0176762	0.642771	0.119559
ARHGAP8	15.6286	12.4929	57.1906	22.6748	120.921	46.3377	0	0	0.27127	0.27127	116.2	52.5357	0.00472257	0.00322786	0.0045782	0.00312301
ARHGAP9	0.149773	0.149773	0.204788	0.204788	0	0	27.3929	27.3929	0	0	59.6952	6.53626	0.142715	0.0150439	0.0670038	0.0287339
ARHGDIA	2.40881	1.67016	4.51855	1.47771	9.31558	3.0887	3.94157	0.71305	6.0806	5.43615	10.9716	3.86133	1410.52	8.6895	588.254	2.69606
ARHGDIB	37.4165	30.8716	79.6095	36.6712	130.569	50.568	1617.23	899.545	1455.26	462.021	217.92	11.5623	32.6421	2.47201	6.43862	0.045529
ARHGDIG	0	0	0	0	0	0	0	0	0	0	0	0	0.375872	0.0836736	0.176472	0.0527662
ARHGEF1	1.5975	1.5975	0.533637	0.533637	8.88824	5.69914	0	0	0	0	45.7518	7.02619	10.513	0.416895	7.0817	0.0484061
ARHGEF10	0.0360254	0.0360254	3.26502	3.24349	3.42105	3.41838	0	0	85.4475	53.1091	6.62869	0.440395	10.4677	0.278177	5.47072	0.0970416
ARHGEF10L	0	0	0	0	0.418366	0.418366	16.6327	16.6327	0	0	1.17638	1.17638	1.65361	0.0294082	1.5325	0.0217394
ARHGEF11	13.8618	13.2813	4.7291	3.33682	4.33361	2.91498	0	0	0	0	18.2248	2.87666	7.81054	0.181688	7.70489	0.0589402
ARHGEF12	2.23461	0.861597	16.6385	9.34586	5.76869	2.17729	0.153744	0.153744	4.21197	3.45908	29.9784	11.164	27.5259	0.322215	29.1594	0.912081
ARHGEF15	0.0567991	0.0567991	0	0	0	0	0	0	0	0	1.98671	1.98671	0.00423103	0.0028919	0	0
ARHGEF16	1.42431	1.42431	20.9303	17.4581	0.313446	0.313446	0	0	12.4414	8.43054	0.62004	0.62004	0.507947	0.0272074	0.565896	0.0233092
ARHGEF17	1.92529	0.849699	3.81757	2.83805	2.67441	1.24013	0	0	9.63771	9.20548	6.23098	0.412647	57.8497	1.95539	50.0776	3.32271
ARHGEF18	0.688086	0.63319	14.5184	9.90033	0.68589	0.662902	0	0	0.00344021	0.00255762	5.46561	1.99959	3.09126	0.106352	3.20549	0.0722427
ARHGEF19	0	0	0	0	0.620427	0.620427	0	0	0	0	0	0	3.08351	0.0496556	11.9924	0.50947
ARHGEF2	0	0	0.774546	0.49224	0.0332232	0.0332232	0	0	3.24981	3.24981	11.475	6.67324	54.4173	0.682345	44.0957	4.92713
ARHGEF25	0	0	0	0	0	0	0	0	0	0	0	0	27.5209	1.82915	39.2487	0.51492
ARHGEF26	0.304099	0.193425	1.15274	0.508904	4.34759	2.62358	17.5399	16.6941	0.30567	0.30567	2.08926	1.94271	0.331089	0.0239076	0.622422	0.0549055
ARHGEF26-AS1	0.255417	0.143256	0.0756658	0.0436371	0.22939	0.104586	0	0	1.57995	1.18558	4.78235	3.91858	0	0	0	0
ARHGEF28	0	0	7.22106e-07	7.22106e-07	0.00214518	0.00214518	0	0	0	0	0	0	3.29518	0.0688967	5.25322	0.130279
ARHGEF3	22.6571	21.8001	2.05285	1.1814	6.1601	4.18983	2.18626	1.84772	80.3564	53.8233	4.14786	0.959516	2.45588	0.0446625	1.68936	0.0856316
ARHGEF3-AS1	0	0	0	0	0	0	0	0	0	0	0	0	0	0	0	0
ARHGEF33	5.58049	5.58049	0.349399	0.349399	0	0	0	0	0	0	0	0	0.533376	0.0536044	0.487694	0.0105363
ARHGEF34P	0.732413	0.445595	3.3953	2.36421	3.3045	1.70166	0	0	1.38824	1.38026	2.95169	1.17085	0	0	0	0
ARHGEF35	37.2721	32.9876	7.12436	3.68641	8.75194	4.30329	0	0	15.8087	14.4621	15.026	5.31175	0.214822	0.0963987	0.116864	0.0509686
ARHGEF37	0.220482	0.220482	0	0	0.0116458	0.0116458	0	0	0	0	1.09374	0.746883	1.69292	0.171719	4.24765	0.552254
ARHGEF38	0.103726	0.103726	0	0	0.317311	0.259137	0	0	0	0	1.83702	1.83702	0	0	0	0
ARHGEF38-IT1	0	0	0	0	0	0	0	0	0	0	0	0	0	0	0	0
ARHGEF39	0.0203009	0.014609	1.88717	1.83337	0.947163	0.486114	0.304563	0.304563	27.7238	26.896	0.272409	0.272409	2.4531	0.1954	0.108315	0.0161475
ARHGEF4	1.39612	0.819891	0.536045	0.396059	0.106464	0.050647	4.4138e-05	4.4138e-05	0.70839	0.570372	0.536147	0.536147	0.42285	0.0494019	0.205942	0.029048
ARHGEF40	0.547535	0.354101	5.58865	2.95914	7.08903	3.38379	0	0	0	0	0.946551	0.335734	6.35426	0.327329	2.57587	0.079996
ARHGEF5	0.828295	0.502301	31.0471	24.2959	7.01203	2.74924	0	0	5.57505	3.56194	8.35782	4.17828	0.144741	0.0148789	0.120368	0.0159407
ARHGEF6	0	0	0	0	0	0	6.31605	6.31605	0	0	159.177	18.3305	0.731514	0.0148001	0.973247	0.0568889
ARHGEF7	10.646	6.45722	11.66	5.25364	18.4992	9.0223	0.247918	0.135721	14.9883	13.4421	23.5534	11.6489	16.9609	0.504531	24.7803	0.533062
ARHGEF9	0	0	0	0	1.68658	1.16389	0	0	1.31745	1.05166	1.18895	0.0333975	4.75021	0.0817992	2.85124	0.0754686
ARHGEF9-IT1	0	0	0	0	0.376706	0.376706	0	0	0	0	0	0	0	0	0	0
ARID1A	9.28766	6.97983	28.0856	7.3806	15.904	3.87469	43.3627	43.3627	15.4125	7.12005	46.3482	9.92834	10.9942	0.14178	6.16386	0.0995466
ARID1B	11.2185	3.34607	13.6775	5.87323	14.829	3.53785	11.3932	10.1594	1.5717	0.771148	23.5159	0.651878	3.31637	0.0662804	2.94103	0.0834709
ARID2	44.3341	24.9252	19.4032	5.83662	18.4615	3.25672	3.7972	1.85423	9.23448	1.49835	45.0619	1.13858	2.20558	0.0725856	2.29102	0.066694
ARID3A	46.2432	15.0662	44.7708	15.4555	34.936	16.0686	0.296964	0.296964	10.9729	4.03045	30.3568	5.9665	46.5787	2.09934	50.3816	1.15308
ARID3B	13.3425	6.26457	18.5487	6.62705	21.1089	9.30996	0	0	1.86198	1.86198	14.7752	9.52906	3.11789	0.0607231	2.2899	0.0987527
ARID3C	0	0	0	0	0	0	0	0	0	0	0	0	0.0500436	0.00956037	0.0314525	0.00243224
ARID4A	9.35184	3.23361	6.62562	2.53665	11.9292	5.30005	10.5794	10.5794	18.6244	11.9495	6.99389	1.93184	6.70905	0.0630568	11.866	0.361761
ARID4B	108.423	40.184	37.7208	10.5826	39.7214	9.52484	4.3304	2.08915	33.0834	12.6965	17.6783	12.0577	4.45113	0.0538695	7.42975	0.124474
ARID5A	0	0	15.4107	15.2118	11.6051	11.5403	65.9811	65.9811	0	0	0	0	5.13244	0.304613	3.34004	0.287233
ARID5B	73.599	27.7542	119.301	28.629	137.718	36.0602	31.5299	19.6776	47.0751	9.17019	37.2459	17.0976	12.9452	0.456801	32.4723	1.39512
ARIH1	4.05195	2.33138	4.58668	2.27116	13.4547	7.16524	17.51	17.3363	4.65247	3.95387	13.5122	2.7723	98.6662	1.30253	137.701	1.03236
ARIH2	11.7867	4.62161	36.0957	20.3354	29.5019	6.87882	1.01273	0.604224	171.4	160.172	5.11643	2.53467	133.623	2.98739	98.9343	1.70532
ARIH2OS	91.3826	31.3112	15.1087	9.13616	13.706	3.58353	18.9381	16.0236	2.07812	2.07801	0	0	0.324936	0.0246254	0.534529	0.0431008
ARL1	7.62015	5.76927	17.6663	4.00771	26.6493	6.17291	4.60001	4.60001	23.0631	7.06542	8.30075	2.40028	235.622	1.01772	384.083	20.4269
ARL10	0	0	0.233757	0.163131	2.24759e-07	2.24759e-07	0	0	0	0	0	0	198.436	5.19909	169.549	8.70189
ARL11	0.00139747	0.00127592	1.27927	1.27927	0.412836	0.283206	13.9869	13.9869	0.507432	0.507432	0	0	0.0129024	0.00579649	0	0
ARL13A	0	0	0.968351	0.968351	0	0	0	0	0	0	0	0	0	0	0	0
ARL13B	0.0214143	0.0214143	0.0108051	0.00785607	0.0367576	0.0266305	0	0	0	0	4.06694	2.39411	9.56002	0.147158	6.57953	0.0610088
ARL14	0	0	0	0	0	0	0	0	0	0	0	0	0.0489185	0.0165035	0	0
ARL14EP	15.9429	15.7823	1.24379	0.570084	8.92536	7.42725	0.181641	0.181641	0.58086	0.263936	3.66569	0.251478	20.7775	0.118711	24.5892	0.371595
ARL15	34.9349	22.4514	10.1874	3.25969	30.6072	6.93895	2.78464	2.78464	4.69599	4.44035	15.8566	1.68788	50.3636	1.40539	36.404	0.892277
ARL16	15.4526	8.6163	96.3906	34.6854	93.2861	42.2035	1.33481	1.33481	50.8173	32.4459	8.12488	8.12488	58.2978	2.57194	39.9585	1.78188
ARL17A	0.691397	0.688835	40.7419	19.6232	24.9427	15.0405	2.23684	2.23684	0.199168	0.199168	18.7619	18.7619	11.8676	2.00121	12.5929	1.21528
ARL17B	23.7157	22.506	9.78735	5.02017	10.8883	5.66929	3.53851	3.53851	0.545043	0.381717	12.1328	6.69557	1.4399	0.250069	1.45384	0.343287
ARL2	3.10216	1.19469	518.496	133.002	574.943	150.473	1931.87	1177.83	124.526	123.794	4.60744	4.60744	70.2782	1.63304	43.1235	2.35288
ARL2BP	18.8794	18.3171	9.28598	4.6995	0.744375	0.368454	8.40105	6.8725	7.46729	6.10912	23.4197	2.006	220.344	5.55247	211.07	2.84723
ARL3	26.2617	22.2969	17.3192	6.30207	5.22146	2.33032	31.3945	31.3945	33.8608	22.0973	0.354117	0.354117	55.5657	2.20831	69.5009	0.972678
ARL4A	102.619	47.9455	80.3916	20.9058	106.168	29.2147	61.1089	27.3787	15.7318	7.6701	3.03566	0.0190672	39.1245	3.18908	36.4	0.433185
ARL4C	6.27236	2.01795	9.42431	6.01835	6.15658	3.34675	23.9537	14.7122	1.73785	1.64863	6.53121	0.890336	23.9437	0.64699	6.11073	0.261623
ARL4D	5.85209	4.07122	19.6364	16.0168	12.5927	7.39358	0	0	0	0	0.970855	0.252891	16.9398	0.651703	16.2278	1.60804
ARL5A	17.1777	11.0632	3.32814	1.42977	2.30174	1.04129	0.457794	0.457794	2.51941	1.55959	38.9332	0.182566	109.238	0.928531	115.152	1.64604
ARL5B	7.91671	7.33817	8.0257	6.64551	6.51997	2.98295	4.16346	4.16346	1.88646	1.19251	1.00759	0.0400506	15.2033	0.068422	33.2329	0.487181
ARL5C	1.34859	1.34859	0.512786	0.266644	0.769081	0.448431	0	0	0	0	35.4722	35.4722	0	0	0	0
ARL6	0	0	0	0	0	0	0	0	0.341683	0.341683	0.541918	0.0160684	13.8662	0.345915	17.637	0.399364
ARL6IP1	123.706	43.4263	196.701	55.2929	149.419	28.1402	67.1238	32.9151	60.9197	41.0462	67.5001	38.2209	700.054	20.9827	350.393	5.32447
ARL6IP4	49.9854	27.915	393.735	180.091	353.94	107.453	27.9168	24.3405	159.723	83.7635	343.799	177.156	0.517796	0.0408112	0.245526	0.0154308
ARL6IP5	74.8106	41.0647	107.594	18.9633	125.486	33.9656	40.0035	10.0312	108.465	22.3327	100.396	41.9121	380.549	1.48711	1253.27	44.9613
ARL6IP6	1.66921	0.948568	13.588	8.74579	9.49198	3.9718	0.583239	0.0804043	0.215629	0.215629	5.85767	0.510076	56.12	1.26222	31.9434	1.08739
ARL8A	10.9155	7.17115	5.46853	2.02057	10.1435	7.7771	5.47478	2.75177	0.709048	0.709048	24.9007	24.9007	174.651	5.48265	276.088	3.2822
ARL8B	35.2359	12.6599	11.727	4.04883	17.9661	4.71575	34.1374	17.1774	18.5244	6.79868	35.4884	21.3217	319.955	8.8722	411.233	5.38422
ARL9	0	0	0	0	0	0	0	0	0	0	0.556311	0.556311	1.35644	0.171698	1.31228	0.148582
ARMC1	25.3041	12.9436	4.21355	1.79909	9.37887	3.2094	0	0	27.484	23.2371	6.0941	2.7466	114.122	0.715581	85.4544	0.50418
ARMC10	3.6981	2.66995	7.68753	4.56652	4.41208	2.021	0	0	7.47113	7.35041	3.27918	1.8228	15.4061	0.0809115	14.6757	0.170136
ARMC12	0	0	0	0	0	0	0	0	0	0	0	0	0.0130701	0.0089186	0.237091	0.0177965
ARMC2	2.05993	2.05993	2.7965	2.32821	0.103803	0.087294	0	0	0.100184	0.100184	1.446	0.851967	1.06639	0.0302107	1.14806	0.0696578
ARMC2-AS1	0	0	0	0	0	0	0	0	0	0	0	0	0	0	0	0
ARMC3	0	0	0	0	0	0	0	0	0	0	0	0	0	0	0	0
ARMC4	0	0	0.0175011	0.0175011	0	0	0	0	0	0	4.71055	4.71055	1.92384	0.128539	0.481074	0.0440145
ARMC5	9.98029	9.98029	0.0732619	0.0510501	0.789737	0.534747	25.4185	12.7389	0	0	0	0	1.72895	0.0691239	1.48306	0.0151645
ARMC6	1.32054	1.32054	0.729794	0.729794	12.6595	8.79308	464.343	464.343	0	0	0	0	30.9612	1.12634	12.6625	0.174982
ARMC7	0	0	1.67407	1.54438	7.67992	5.2571	0	0	1.9001	1.9001	0.165032	0.165032	12.5441	0.595354	18.0195	0.647015
ARMC8	0.532241	0.280182	3.10859	1.21344	16.8067	5.75845	0	0	22.6715	15.4131	5.02244	0.995675	12.5953	0.368252	11.1384	0.239888
ARMC9	1.24978	1.00627	2.91458	2.48896	0.249245	0.0971303	0	0	0.282112	0.228862	1.22852	1.11702	71.2229	1.41864	131.666	3.82931
ARMCX1	0	0	0.00924436	0.00924436	2.87263	1.91134	0	0	0	0	1.26245	1.26245	13.7086	0.554441	19.9714	0.545173
ARMCX2	1.47106	1.47106	0	0	0.859822	0.859822	0	0	0	0	1.95748	1.22268	48.0416	1.76384	72.3662	2.01602
ARMCX3	24.178	10.0697	21.3462	7.04142	13.6492	3.34165	7.87315	7.63657	1.06619	0.657092	6.01318	1.15312	93.6779	3.1009	219.618	8.06709
ARMCX4	0	0	0	0	0	0	0	0	0.0229713	0.0229713	0.987018	0.526326	1.38326	0.0493042	1.06325	0.012433
ARMCX5	0.0312319	0.0312319	0.273808	0.160805	0.0587223	0.0418973	0	0	0.0742113	0.0742113	0.232846	0.232846	9.36185	0.429468	12.0774	0.203713
ARMCX6	68.4321	66.6338	81.8674	45.497	62.6058	26.0286	0	0	3.67842	3.67842	12.1998	8.31408	62.3634	0.56201	61.3074	3.8116
ARMS2	0	0	0	0	0	0	0	0	0	0	0	0	0	0	0.0632892	0.0285974
ARNT	8.54027	5.70852	22.5365	8.76675	17.4591	4.76729	0.0890293	0.0890293	18.7752	9.69244	9.77323	3.27734	31.8548	0.727626	45.9298	0.800493
ARNT2	0.623934	0.623934	0.127906	0.11351	0.627354	0.566122	0	0	4.13318	3.09353	0.294649	0.218958	14.4412	0.758301	66.71	5.96812
ARNTL	4.21241	4.21241	2.03884	1.79682	4.26415	3.27213	0	0	0.69918	0.428436	0.439518	0.0219773	8.03225	0.580783	7.00892	0.188498
ARNTL2	0.0328694	0.0226806	0.304558	0.233677	0.110401	0.0720446	0.0984771	0.0984771	0.802834	0.789077	3.03001	1.52833	32.344	0.179029	2.46698	0.248721
ARNTL2-AS1	0	0	0	0	0	0	0	0	0	0	14.9878	9.23825	0	0	0	0
ARPC1A	28.8929	16.4331	459.691	121.187	262.089	96.7051	338.999	336.448	104.784	30.9859	7.51304	1.7094	105.781	0.400542	89.0713	1.63906
ARPC1B	248.744	239.988	202.395	47.5481	127.979	41.8525	1179.89	990.895	606.107	148.561	90.4718	9.62457	199.912	9.33243	149.45	3.80733
ARPC2	600.808	171.331	772.653	80.6741	881.227	112.389	647.668	639.414	2258.34	979.745	747.012	23.972	766.638	16.6538	433.069	2.68624
ARPC3	100.831	63.8573	1011.73	494.891	551.079	73.8415	1215.37	434.637	454.322	139.486	30.0721	4.93565	602.558	15.7012	625.664	3.09551
ARPC4	310.899	113.543	448.906	70.7369	603.774	62.1814	2040.75	415.727	622.282	213.423	153.475	32.5481	242.181	6.33064	164.261	1.44016
ARPC4-TTLL3	3.02042e-06	3.02042e-06	0.0360571	0.036057	19.3475	18.2279	0	0	5.23917	2.69825	6.06547	6.06547	0	0	0	0
ARPC5	11.3171	7.77934	127.299	50.1975	84.2375	14.2836	314.522	222.096	8.89891	7.25122	44.377	29.4683	533.853	2.2366	342.477	1.89724
ARPC5L	41.3653	24.6475	35.4129	15.5339	57.4302	21.6399	2.72405	2.72405	63.7269	49.4052	20.8997	16.3322	79.375	3.39515	37.5599	0.464595
ARPP19	0.668427	0.334317	8.89766	2.59632	15.0003	5.15984	10.4121	7.98755	2.95911	1.79817	20.0643	1.0226	1279.42	61.9418	885.2	3.99161
ARPP21	0	0	0	0	0	0	0	0	0	0	0	0	0.033475	0.015653	0.248648	0.0414852
ARR3	0	0	0	0	0	0	0	0	0	0	0	0	0	0	0	0
ARRB1	2.6979	1.73273	5.67624	2.87937	8.33776	2.94975	0	0	0.0942936	0.0942936	2.78283	0.26136	21.48	1.06915	21.1941	1.08263
ARRB2	0	0	0.140455	0.140455	0	0	44.8204	44.8204	0	0	19.1543	13.7745	8.24368	0.61353	5.55383	0.400529
ARRDC1	0	0	38.7718	26.6903	20.0818	16.6687	24.6929	19.9101	196.077	183.76	11.4091	2.97256	15.1416	0.566251	9.89671	0.173371
ARRDC2	0	0	0	0	1.85611	1.85611	0	0	0	0	1.73216	1.73216	2.87669	0.180084	3.31032	0.122957
ARRDC3	425.516	162.35	463.752	109.917	456.484	89.5322	103.677	90.7178	402.99	157.434	94.4592	19.9797	34.0608	1.09468	104.084	0.366288
ARRDC4	0	0	0.0821063	0.0821063	0	0	0	0	0.54239	0.54239	10.1348	4.62328	19.7987	3.3073	11.9152	0.913512
ARRDC5	0	0	0	0	0	0	0	0	0	0	0	0	0	0	0	0
ARSA	1.20453	0.685733	5.17021	3.0309	14.4241	6.95833	0.388549	0.38303	4.3218	1.6358	10.1555	10.1555	10.0378	0.25112	22.9431	1.18039
ARSB	0.0134541	0.0114346	6.31963	3.56062	5.10998	1.78813	6.54991	4.2792	0.903088	0.668453	37.4136	35.2741	30.3015	0.416707	46.3857	0.548073
ARSD	33.9081	32.3216	9.64767	4.49355	10.5204	5.16092	1.13612	1.13612	3.37009	2.3703	40.2718	38.4572	24.3741	1.73319	59.2993	1.08425
ARSE	0	0	0	0	0	0	0	0	0	0	0	0	1.7716	0.169151	6.96226	0.366814
ARSF	0	0	0	0	0	0	0	0	0	0	0	0	0.00232993	0.00158987	0.00213563	0.00146104
ARSG	0	0	1.63323	1.55539	14.8183	12.3207	0	0	0	0	6.9163	5.36173	1.67553	0.153254	32.0691	0.495433
ARSH	0	0	0	0	0	0	0	0	0	0	0	0	0.00219087	0.00149833	0	0
ARSI	0	0	0	0	0	0	0	0	0	0	0	0	19.0078	0.565242	3.88578	0.290307
ARSJ	0	0	0	0	0	0	0	0	0	0	1.51656	1.05816	42.9035	2.4092	10.2187	0.10321
ARSK	25.3459	16.5235	3.82243	3.10573	6.53711	3.13506	0	0	3.80513	3.68856	1.77942	1.77942	9.55939	0.371915	8.36322	0.187314
ART1	0	0	0	0	9.58024	7.0419	0	0	0	0	0	0	0	0	0	0
ART3	0	0	0.571226	0.571226	0	0	0	0	0	0	0	0	0.115234	0.020209	0.147878	0.0298905
ART4	0	0	0	0	0	0	0	0	0	0	0.539905	0.539905	0.0411032	0.00948816	0	0
ART5	0	0	0	0	0.877305	0.877305	0	0	0	0	0	0	0.202297	0.0844344	0.612554	0.197081
ARTN	0	0	0	0	0	0	0	0	0	0	17.2866	6.81767	1.15703	0.206973	0.452201	0.119335
ARV1	1.0996	1.0996	13.7254	6.72645	25.8952	8.9781	0	0	13.4877	12.7686	35.0664	1.41204	12.555	0.379699	19.3584	0.936645
ARVCF	0	0	0	0	0.812681	0.812681	0	0	0	0	0.892364	0.892364	0.824151	0.0406745	2.1665	0.0316692
ARX	0	0	0	0	0	0	0	0	35.2584	22.2612	0	0	0	0	0.00387869	0.00264839
AS3MT	3.50633	1.86557	1.14879	0.579607	1.35047	0.913127	0.140274	0.140274	1.8854	1.19219	0	0	3.17231	0.734725	1.82802	0.479445
ASAH1	69.9015	31.8558	192.289	66.7662	146.549	27.3027	13.1179	7.35871	107.603	57.0113	35.6093	7.43488	79.6253	0.439478	269.048	3.72533
ASAH2	0	0	0	0	0	0	0	0	0	0	5.97274	5.69067	0.108179	0.0231817	0.0910391	0.0159806
ASAH2B	0	0	0.501705	0.501705	0	0	0	0	0	0	41.1923	39.3173	6.25048	0.634077	5.36133	0.752237
ASAP1	52.1267	25.9914	43.8868	18.4174	21.6195	6.76969	1.91124	1.72639	31.4522	14.3354	36.0266	9.47193	113.135	1.59007	106.485	1.12445
ASAP2	25.563	25.4743	4.44546	1.72951	7.04876	2.35998	0	0	0.268757	0.268757	1.35459	0.452196	13.5879	0.955055	9.32535	0.309805
ASAP3	0	0	0	0	1.74386	1.04113	0	0	23.3864	7.04231	3.56778	1.46525	8.38969	0.596546	11.5699	0.316715
ASB1	0	0	0.129275	0.0844833	0.635802	0.635802	0.100541	0.100541	0.0883971	0.0883971	0.97297	0.773165	85.7936	4.25545	70.8487	5.80095
ASB10	0	0	0	0	0	0	0	0	0	0	0	0	0	0	0	0
ASB11	0.392036	0.303553	0.0666459	0.061596	0.0830036	0.0558411	0	0	0.0214397	0.0214397	0.141342	0.141342	0	0	0	0
ASB12	0	0	0	0	0	0	0	0	0	0	0	0	0	0	0	0
ASB13	0	0	0.12048	0.0849172	0.564392	0.564392	0	0	0	0	0	0	18.9179	0.539385	26.7806	0.5701
ASB14	0	0	0.00579956	0.00579956	0	0	0.600248	0.600248	0	0	0.990392	0.990392	0	0	0	0
ASB15	11.7948	11.5172	15.7926	6.66625	17.0236	5.96341	0	0	1.10882	1.10882	0	0	0	0	0.0121066	0.0034054
ASB16	8.40602e-06	8.40602e-06	0	0	0	0	0	0	0	0	4.05002	4.05002	0.0338187	0.00546827	0.0104386	0.00553748
ASB16-AS1	25.0488	13.7759	3.89633	2.43187	4.92249	3.01314	0.00123903	0.00123903	1.4343	1.4343	2.3558	2.3558	0	0	0	0
ASB17	0	0	0	0	0	0	0	0	0	0	0	0	0	0	0	0
ASB18	0	0	0	0	0	0	0	0	0	0	0	0	0.193875	0.0390933	0.019774	0.00578306
ASB2	0	0	0	0	0	0	0	0	0	0	2.22211	2.22211	1.0778	0.345257	0.868476	0.164838
ASB4	0.0502002	0.0502002	0	0	0	0	0	0	0	0	0	0	0.00415033	0.00283205	0	0
ASB5	0	0	0	0	0	0	0	0	0	0	0	0	1.22184	0.195635	0.147303	0.0219393
ASB6	6.0192	2.27224	7.37302	2.29252	7.16883	2.28737	3.33598	2.49284	0.138199	0.136274	4.27533	0.898628	12.4512	0.0585523	10.2486	0.0926572
ASB7	2.25819	1.29924	1.24481	0.796876	1.92727	1.31152	0	0	0.692094	0.692094	16.1007	15.3121	14.6044	0.180256	19.5971	0.273203
ASB8	71.5518	38.8696	23.5946	9.92284	12.8469	7.22506	1.09651	1.09651	19.3824	19.3824	13.3619	11.9976	55.2052	1.05248	47.0406	1.2462
ASB9	0	0	0.0913261	0.0913261	0.144969	0.144969	0	0	0	0	0	0	0.657239	0.0732632	0.173759	0.0368456
ASB9P1	0	0	0	0	0	0	0	0	0	0	0.485463	0.485463	0	0	0	0
ASCC1	18.3319	17.8884	4.03953	3.00399	4.9653	2.74083	185.028	185.028	51.7554	50.0036	1.5502	1.31082	24.9151	0.622647	30.4759	0.462872
ASCC2	6.18971	6.18971	31.0549	15.4529	74.1585	51.1494	0	0	90.1246	69.7443	8.17125	2.93984	55.0153	0.43642	46.7351	1.82845
ASCC3	44.5495	43.3686	23.4725	11.0379	9.27028	3.27443	9.55941	9.55941	9.70491	4.53633	89.8317	65.4993	10.4086	0.103509	10.2072	0.739964
ASCL1	0.13472	0.13472	0	0	0.0664574	0.0664574	0	0	0	0	0	0	0.020515	0.00600345	0.00836271	0.00374192
ASCL2	0	0	0	0	0	0	0	0	113.888	53.1397	17.3591	17.3591	0.00643699	0.00440226	0.320491	0.0747149
ASCL3	0	0	0	0	0	0	0	0	0	0	0	0	0	0	0	0
ASCL4	0	0	0	0	0	0	0	0	0	0	0	0	0	0	0	0
ASCL5	0	0	0	0	0	0	0	0	0	0	0	0	0	0	0.0423149	0.0288929
ASF1A	2.59362	1.88993	10.9994	5.79308	3.83574	2.9544	0.0908242	0.0908242	16.1635	10.3487	17.602	0.477673	51.3529	1.7619	72.1938	3.21328
ASF1B	0.18944	0.18944	10.4407	8.22444	6.13276	4.32356	103.564	103.564	0	0	0	0	177.76	13.7739	3.24336	0.25883
ASGR1	0	0	0	0	0	0	0	0	0	0	0	0	0.81446	0.0484269	0.355329	0.036547
ASGR2	0	0	0.0710956	0.0710956	18.157	18.157	1.15028	1.15028	0	0	0	0	0	0	0	0
ASH1L	35.4922	16.2754	36.5878	12.3624	22.8369	7.00666	69.1129	67.6311	43.0178	22.9563	35.847	8.01578	14.8655	0.382846	13.5516	0.199313
ASH1L-AS1	0.0429694	0.0429694	0.292776	0.292776	0.179445	0.0825218	0	0	2.07893	2.07893	0	0	0	0	0	0
ASH2L	58.8345	52.9391	3.10839	1.5353	10.2746	5.12544	0	0	0	0	12.2658	4.49105	19.5164	0.766228	12.1438	0.3632
ASIC1	0	0	0	0	0	0	0	0	0	0	0	0	1.45945	0.0824239	2.46291	0.186941
ASIC2	0	0	0	0	0	0	0	0	0	0	0	0	0.0589784	0.00521013	0.0405978	0.0125156
ASIC3	0	0	0	0	0	0	0	0	0	0	7.91549	7.91549	0.2823	0.0435854	0.0775575	0.0131555
ASIC4	0	0	0.288189	0.212883	0.3906	0.259097	0	0	0	0	0	0	0.00557344	0.00142701	0.00278729	0.00103316
ASIC5	0	0	0	0	0	0	0	0	0	0	0	0	0	0	0	0
ASIP	0	0	0	0	0	0	0	0	0	0	0	0	0.0309516	0.0211554	0.18951	0.0939737
ASL	0.326167	0.233761	8.24201	8.20016	26.358	21.5861	0	0	1.28123	1.28123	0.740809	0.740809	16.2488	0.39907	10.7049	0.408149
ASMT	0	0	0	0	0.000503594	0.000503594	0	0	0	0	0.350448	0.0140617	0	0	0	0
ASMTL	36.5041	28.2372	55.069	33.5909	49.7484	25.3969	0	0	3.98255	3.98255	9.88874	1.73072	3.96473	0.0773689	8.75107	0.248187
ASMTL-AS1	32.0907	32.0907	1.16742	0.719889	0.279373	0.254479	4.56244	4.56244	2.95105	2.95105	1.23045	1.23045	0	0	0	0
ASNA1	63.958	43.7447	79.5067	34.5776	92.79	30.748	0	0	27.7743	24.9467	13.5581	4.02389	55.4753	0.225913	47.9819	0.705021
ASNS	0	0	13.0426	12.9424	30.6392	29.207	0	0	2.95318	2.95318	0	0	14.3056	1.81552	11.0383	2.36755
ASNSD1	23.0622	11.2559	31.6327	12.1686	41.6921	14.154	0.266448	0.266448	24.7668	22.7631	29.5346	5.26366	17.6053	0.428113	17.6061	0.533793
ASPA	0	0	0	0	0	0	0	0	0	0	0.434186	0.434186	0.0665941	0.00700614	0.0686525	0.0112347
ASPDH	0	0	0	0	0	0	0	0	0	0	0	0	0	0	0	0
ASPG	0	0	0	0	0	0	0	0	0	0	0	0	0.00807409	0.0055127	0.0170417	0.00626794
ASPH	31.4438	25.8641	26.8586	7.98088	39.5247	12.0522	3.08363	2.99268	19.1117	9.93849	45.5054	9.5495	523.741	10.7522	421.289	34.3085
ASPHD1	0	0	0	0	0	0	0	0	0	0	0	0	3.0102	0.0957987	9.83043	0.248825
ASPHD2	0	0	0	0	3.32905	3.29092	0	0	1.01013	0.896718	0.948083	0.948083	1.2663	0.0690423	1.77351	0.19161
ASPM	4.33098	4.19462	2.02723	0.891367	3.35628	1.49146	0.346059	0.346059	0.01889	0.01889	3.08159	0.124463	5.19734	0.0926828	0.15622	0.00658579
ASPN	0	0	0.780221	0.76449	0.0738938	0.064986	0	0	0	0	6.36642	1.7088	0.303735	0.0148351	0.691792	0.0503593
ASPRV1	0	0	0	0	0	0	0	0	0	0	0	0	0.0904187	0.013945	0.414447	0.0119191
ASPSCR1	1.81191	1.29632	132.776	95.1004	130.063	76.7098	0	0	328.371	179.962	3.03433	0.477083	11.5992	0.0937677	9.42044	0.153168
ASRGL1	0.00123382	0.00123382	0.445611	0.401051	6.96001	6.83061	41.2188	40.68	0	0	6.20408	6.20408	4.95208	0.559313	0.696442	0.0998788
ASS1	69.0704	41.0021	367.912	117.004	819.378	290.064	0	0	1.90224	1.90224	43.6091	20.4675	13.3885	3.035	41.4892	10.0629
ASTE1	0.576818	0.403539	10.9303	8.12991	2.63304	1.61689	1.35766	0.785107	0	0	5.94378	2.10752	6.30459	0.0856365	3.25683	0.093138
ASTL	0	0	0	0	0	0	0	0	0	0	0	0	0.0247175	0.00679196	0	0
ASTN1	0	0	0.0085207	0.0085207	0	0	0	0	0	0	0.263365	0.263365	0.000907466	0.000620617	0	0
ASTN2	10.1712	6.3821	1.30486	0.273946	1.55722	0.269921	0.824242	0.483121	6.17779	2.32704	11.899	2.93013	1.57093	0.195784	1.48909	0.113747
ASUN	5.69382	3.26133	11.7879	8.34418	15.9058	12.4885	0	0	0	0	5.74989	2.95406	33.3891	0.912483	27.014	0.97342
ASXL1	18.2952	10.9183	4.00333	2.04319	9.86407	3.50429	0.488555	0.488555	32.8528	31.3749	0.6629	0.326352	30.3875	0.487763	20.1497	0.391136
ASXL2	3.17197	3.17197	0.170816	0.110599	4.01276	1.81575	3.06673	2.86057	0	0	13.4391	0.118083	5.00363	0.156189	4.07917	0.0629277
ASXL3	0.0405876	0.0405876	0	0	0.332494	0.270264	0	0	0	0	2.29135	1.18818	0.0137652	0.00276506	0.00596887	0.0024625
ASZ1	0	0	0	0	0.221278	0.221278	0	0	0	0	2.22241	0.714132	0	0	0.0244854	0.00578199
ATAD1	8.85495	4.90982	17.2989	7.0462	7.20866	2.31422	0.286785	0.286785	2.16753	2.16753	14.4942	4.19029	56.7049	1.83792	101.06	1.06891
ATAD2	5.98194	5.48489	18.2422	7.49354	10.1658	4.79485	4.32002	4.01329	0.369954	0.325663	2.18613	0.00283695	14.2216	1.15759	0.731719	0.0497695
ATAD2B	11.7459	11.4335	7.07448	3.25433	6.64424	2.60048	0.701589	0.637927	0.119951	0.0510531	9.17945	2.96037	3.60622	0.0594941	4.2768	0.183306
ATAD3A	4.29284	4.29284	3.98911	3.96649	3.14395e-08	3.14395e-08	12.5188	10.8093	0	0	15.722	10.1433	14.7399	0.456003	7.63086	0.389598
ATAD3B	0	0	0.100504	0.100504	0.890075	0.528203	2.35931	2.35931	0	0	1.66716	1.66707	5.85073	0.242969	2.66105	0.0542114
ATAD3C	1.29365	1.14756	0.366136	0.145812	0.524344	0.31309	0	0	0.21521	0.21521	0	0	0.822537	0.0410514	0.719219	0.0823978
ATAD5	0.293408	0.293408	12.1842	6.52205	6.68037	2.24175	0	0	0	0	1.26001	0.189334	1.28237	0.0841745	0.0525999	0.00725399
ATAT1	0.496012	0.414078	9.72289	8.86595	1.17878	1.17878	0	0	0	0	15.3544	8.10556	0.215197	0.0502343	0.154451	0.0247799
ATCAY	3.42644	1.82943	1.58276	0.880579	0.299034	0.204557	0	0	0.701773	0.464429	7.64281e-05	7.64281e-05	0.120821	0.0346926	0.117463	0.0473613
ATE1	0.697574	0.641677	0.885924	0.382668	3.62866	1.77523	2.5526	2.5526	4.27701	2.91723	4.63829	1.25397	15.0522	0.205388	13.8149	0.172926
ATF1	5.93635	4.3247	2.72335	1.73127	5.15451	3.21135	0.128043	0.128043	0.703145	0.455709	18.0938	0.0591529	43.2608	0.518767	39.1924	1.16798
ATF2	6.10463	3.74195	9.34227	4.9239	11.9055	5.04952	3.3408	3.3408	16.7534	10.889	72.8121	15.0921	27.5185	0.0998528	29.9049	1.59477
ATF3	270.404	66.6292	184.023	32.5855	135.004	25.3797	46.4668	40.9427	550.571	307.917	183.903	7.16005	13.3984	0.802756	11.6963	3.75578
ATF4	457.589	136.377	908.16	261.089	523.485	110.247	99.3479	73.0109	912.6	354.216	220.151	72.8905	110.366	1.6394	100.13	13.7213
ATF5	0	0	18.9621	16.5878	17.0133	14.4861	0	0	0.385589	0.385589	5.21225	5.21225	23.7935	0.0743159	16.8502	0.831398
ATF6	9.74526	3.87189	29.9104	10.4071	13.1442	2.61713	62.8832	43.7716	18.2685	6.42855	33.2905	4.11945	11.8203	0.422028	13.7035	0.272742
ATF6B	188.131	171.182	77.8431	33.443	147.578	37.6068	76.9859	76.9859	3.28262	2.50365	65.5059	28.1448	4.15456	0.379085	5.46463	0.462703
ATF7	0.287047	0.140684	29.0044	19.6409	26.9172	14.3304	0.418856	0.418856	16.3835	9.4346	5.27693	2.23452	49.291	0.66262	40.5446	1.68296
ATF7IP	1.78375	1.10725	8.19973	3.75256	20.3764	12.8474	0	0	1.13246	0.998629	47.0658	4.75642	24.1528	0.229945	28.7303	0.419537
ATF7IP2	34.6976	27.396	22.6108	17.3576	26.2784	9.4913	0.199776	0.100289	6.70925	6.70925	25.4696	19.8399	1.36809	0.085538	2.09403	0.369468
ATG10	1.69948	1.58184	0.798423	0.436099	0.557238	0.355871	0	0	1.93342	1.76075	2.16219	1.20065	10.3596	0.454797	12.5835	0.111938
ATG101	61.512	36.5417	5.94622	4.60344	84.4575	36.013	24.3395	20.9894	22.9646	22.9646	1.84875	1.84875	70.7858	0.597096	75.394	3.0505
ATG12	3.74498	2.55906	6.96089	2.69501	20.37	6.37139	1.17671	1.17671	22.4504	9.39752	4.52136	2.70242	167.708	4.81426	179.921	6.08482
ATG13	0.157189	0.145661	2.88076	1.54824	6.87695	4.99426	0.415928	0.247914	11.9524	8.53868	1.64395	0.773596	81.5434	1.41008	148.744	7.85101
ATG14	0.270655	0.201113	2.07654	1.05289	4.70359	2.48366	0.0594639	0.0594639	5.15108	3.21063	3.22012	0.217155	3.31656	0.0199881	5.1368	0.0804548
ATG16L1	32.1297	32.1041	8.90859	8.29286	2.66456	1.25363	86.8299	86.8299	0.696518	0.696518	6.20051	5.27186	27.9863	0.277984	30.7283	1.48623
ATG16L2	7.66789	5.26259	18.1632	17.9017	1.93406	1.93406	35.1682	35.1682	0	0	57.7715	19.3725	9.23419	0.70353	5.05217	0.268994
ATG2A	3.51766	2.68858	22.6823	15.2531	100.955	51.1701	0	0	0	0	1.93897	1.93897	2.09913	0.0542097	2.08748	0.0129417
ATG2B	1.84018	1.40846	1.82107	0.654412	2.07328	0.810193	0	0	0.136342	0.136342	2.85935	0.502835	18.3487	0.100533	24.6113	0.244151
ATG3	10.8993	6.37552	40.5116	18.5046	32.5442	16.0076	26.4023	26.1308	28.6201	23.6587	7.20718	3.29336	112.758	1.51708	73.9862	0.495442
ATG4A	0	0	5.52013	3.78802	17.7341	11.3872	0	0	4.89401	4.89401	2.29151	1.52973	8.04424	0.239644	7.01631	0.259886
ATG4B	1.32325	0.811561	21.5698	13.0022	27.2377	19.4896	0.101958	0.101958	37.6411	23.5743	2.98272	2.04865	59.7461	0.862991	63.2145	0.51106
ATG4C	1.11015	1.11015	3.13348	2.08962	17.3291	9.23002	0	0	23.3658	15.6879	3.63479	0.471057	18.1384	0.349957	15.3876	0.916048
ATG4D	0.0831152	0.0831152	4.30114	2.72031	26.6421	12.845	0	0	2.21334	2.21334	0	0	14.6109	0.13368	12.8813	0.238425
ATG5	0.0551271	0.047704	8.4739	3.17087	9.71443	2.80927	7.57187	7.30403	10.1713	6.97903	6.35561	0.796549	24.233	0.19048	16.9739	0.0800355
ATG7	3.51756	2.54793	7.11976	3.07965	17.317	6.17054	20.3196	20.3196	16.4762	8.55506	27.7866	5.65212	27.5286	0.290213	16.8198	0.20351
ATG9A	7.00956	4.39138	8.14223	5.08015	66.0457	31.5548	0	0	0.202508	0.126551	25.485	16.6538	69.9822	1.00692	110.439	0.210167
ATG9B	202.256	127.21	115.783	43.0719	184.213	63.9193	0.550643	0.550643	7.38275	7.38275	219.808	37.6452	0.0714699	0.0125141	0.0909933	0.0203183
ATHL1	0.100781	0.100781	0	0	0	0	0	0	0	0	0	0	0.833909	0.0118676	3.20219	0.130939
ATIC	31.8218	24.2663	144.562	31.4681	144.908	27.4584	0.599205	0.599205	48.4727	26.4631	9.36807	2.22225	75.2389	1.70802	57.8835	1.49782
ATL1	0	0	0.557365	0.552391	3.75248	3.22236	0	0	0	0	0	0	1.9453	0.227316	1.88781	0.325511
ATL2	7.88063	4.98802	1.90138	1.40003	6.01004	3.66604	1.26204	1.11396	0	0	12.1878	5.45167	43.8205	0.59334	30.2448	0.605029
ATL3	16.9112	16.4972	15.7405	7.57902	1.50506	0.908741	121.084	121.084	27.2262	27.2262	23.6682	5.76717	105.966	0.557412	57.7922	9.1919
ATM	1.516	0.436662	3.58517	2.34565	8.47729	4.74759	0.0765414	0.0407904	9.7448	8.74947	22.8453	11.1705	19.4504	0.277336	17.7117	0.302133
ATMIN	6.0707	2.4774	6.60582	2.41919	12.8011	3.91542	0.573971	0.36505	13.5042	8.76704	9.85837	0.534549	8.98177	0.120159	12.7216	0.0719433
ATN1	5.46086	4.29898	7.80371	2.34874	8.46523	2.38555	17.3325	17.2239	0.246417	0.246086	98.8139	21.7874	21.8248	0.0901294	18.4555	0.63423
ATOH1	0	0	0	0	0	0	0	0	0	0	0	0	0	0	0	0
ATOH7	0	0	0	0	0	0	0	0	0	0	0	0	0.0429211	0.0119927	0.0768758	0.0247025
ATOH8	0	0	0	0	0	0	0	0	0	0	0.147165	0.147165	34.362	2.1516	70.9057	9.35984
ATOX1	605.192	574.991	363.174	91.7668	561.709	135.032	2977.16	2170.1	372.273	146.507	0	0	280.402	5.69473	224.178	6.38175
ATP10A	0	0	0	0	0	0	0	0	0	0	0	0	4.20702	0.137531	0.369304	0.0207724
ATP10B	0.0229136	0.0229136	0.0190598	0.0190598	0	0	0	0	1.11169	1.11169	0.0435922	0.0435922	0.0118708	0.0029648	0.00500563	0.00186667
ATP10D	44.0138	25.4826	74.6427	32.6617	64.0553	13.4842	15.0979	14.422	28.59	8.78973	51.6769	19.7583	51.475	2.70194	116.609	5.39807
ATP11A	0.139232	0.139232	0	0	0	0	0.12758	0.12758	18.7372	14.3077	7.82503	3.15596	6.68619	0.448279	6.37651	0.123793
ATP11A-AS1	0	0	0	0	0	0	0	0	19.6285	19.6285	5.85572	4.02118	0	0	0	0
ATP11AUN	0	0	0	0	0	0	0	0	0	0	0	0	0	0	0	0
ATP11B	0.898919	0.603796	8.14891	6.16752	4.72817	2.39057	6.60619	6.51877	0.263443	0.222217	4.98075	1.22239	30.8293	1.37783	28.2119	0.518274
ATP11C	3.79422	3.67146	0.154584	0.143471	1.09885	0.713949	2.36355	2.36355	0.323448	0.323448	4.78948	2.52625	8.22731	0.161889	5.94212	0.166802
ATP12A	0	0	0	0	0	0	0	0	0	0	0	0	0	0	0	0
ATP13A1	1.21584	0.866143	37.1879	33.4007	22.3878	17.3928	3.04655	3.04655	0.88236	0.711933	73.5161	51.704	21.2854	0.33586	28.9474	0.50587
ATP13A2	4.53138	4.24795	0	0	0.708992	0.572943	0	0	0	0	1.23336	1.23336	26.6029	1.31341	21.2641	0.163626
ATP13A3	30.9873	18.1532	30.5542	8.83275	22.1041	7.33488	13.614	8.21865	18.5783	14.0448	36.3707	1.82332	189.269	5.62839	237.08	14.1632
ATP13A4	0	0	0	0	0	0	0	0	0	0	2.59491	2.59491	0.00552355	0.0015803	0.020137	0.00305288
ATP13A5	0	0	0	0	0	0	0	0	0	0	0	0	0	0	0	0
ATP1A1	10.9651	4.17491	23.3244	10.2943	25.0602	9.21869	1.13662	0.491448	13.4463	6.41227	29.6646	5.78281	166.646	0.565298	141.112	4.78077
ATP1A1-AS1	0	0	0.214684	0.214684	22.8296	21.4125	0	0	13.5638	13.5638	3.09795	3.04708	0	0	0	0
ATP1A2	0	0	0.0208495	0.0173794	0.00085696	0.00085696	0	0	0.000138954	0.000138954	2.07424	2.07424	0.00128419	0.000877743	0.0286027	0.00335976
ATP1A3	0	0	0	0	0	0	0	0	0	0	0	0	0.116766	0.00468123	0.0565576	0.0091291
ATP1A4	18.3874	18.0179	8.46506	8.42497	1.25067	1.03528	0.500497	0.500497	110.834	99.6299	0.789208	0.110652	0	0	0	0
ATP1B1	7.38364	6.1884	4.96219	3.33106	2.94506	1.39006	20.7844	16.2539	4.72261	3.96084	9.48398	7.10495	46.8237	1.20576	20.24	2.37617
ATP1B2	0.82861	0.632434	1.94161	1.50011	2.57435	2.4281	0	0	0	0	11.7154	2.46142	0.318939	0.0424721	0.46873	0.0634025
ATP1B3	244.648	146.258	77.4383	15.4099	60.355	12.011	79.7615	48.6454	434.718	433.864	17.9554	10.7691	474.895	2.60794	487.619	11.324
ATP1B4	0.125708	0.112654	0.0344595	0.0294637	0.0349443	0.0239141	0.180304	0.180304	0.0494096	0.0494096	0	0	0	0	0	0
ATP2A1	0	0	0	0	0	0	0	0	0	0	1.31972	0.702233	0.322106	0.0177725	0.298664	0.0513976
ATP2A2	22.3434	11.7444	25.2371	11.2489	166.675	137.521	1.62909	1.62909	28.9537	11.033	7.40062	2.75606	73.407	0.202442	107.88	6.76519
ATP2A3	0	0	0	0	0	0	0	0	0	0	1.26161	1.26161	0.421614	0.0531987	1.42154	0.108045
ATP2B1	34.5636	15.8079	28.5718	9.31644	33.4569	7.57395	3.6368	3.10753	6.74259	2.28001	6.03373	1.86576	66.7376	2.04452	28.0726	0.425771
ATP2B2	0	0	0	0	0	0	0	0	0	0	0	0	0	0	0	0
ATP2B3	0	0	0	0	0	0	0	0	0	0	0	0	0.00281111	0.00029757	0.000701373	0.000534018
ATP2B4	47.7473	35.2168	36.8089	11.8911	53.4601	10.7839	5.99651	5.11999	5.47597	5.26547	32.0364	2.05896	41.8288	0.107553	20.3317	0.554365
ATP2C1	1.27829	0.881241	12.6376	9.14435	1.25313	0.519124	6.41113	3.22461	12.5783	11.111	37.9356	14.7124	22.1192	0.149273	24.9524	0.193826
ATP2C2	1.08673	0.847881	4.04972	2.96331	0.924726	0.743418	0	0	0	0	1.2173	1.2173	0.00488521	0.00333351	0	0
ATP4A	0	0	0	0	0	0	0	0	0	0	0	0	0.001742	0.00119135	0	0
ATP4B	0.142665	0.142665	0	0	0	0	0	0	0	0	0	0	0	0	0	0
ATP5A1	74.0676	26.9246	307.608	67.7005	346.073	58.7694	48.4613	26.4255	237.437	150.516	219.799	2.09205	259.495	4.11772	251.377	7.73877
ATP5B	279.066	111.539	429.394	56.4417	459.044	60.4923	384.149	270.381	74.2553	34.8767	96.3643	31.1277	411.014	3.23377	380.169	17.4286
ATP5C1	136.265	56.9744	499.857	89.9065	580.221	78.0337	401.452	202.621	266.978	107.366	213.805	42.8484	194.038	1.07196	166.167	6.02009
ATP5D	123.494	51.2667	742.642	235.317	237.219	167.052	1059.95	1012.48	0	0	9.58207	9.58207	129.403	2.49622	123.407	4.55039
ATP5E	231.573	145.253	693.452	148.528	480.574	78.8506	1961.49	596.34	456.263	152.366	160.058	160.047	346.687	13.1861	350.245	6.70662
ATP5EP2	7.04727	7.04727	6.34954	2.45544	2.90651	1.66889	13.1486	7.08002	8.82888	8.82888	0	0	15.5919	3.73229	26.9671	2.36364
ATP5F1	17.8751	8.05658	99.3879	18.9575	127.832	22.6048	27.1861	22.4477	65.2481	26.7654	14.6727	2.26634	213.773	1.56145	180.585	1.62271
ATP5G1	50.9589	29.7507	504.885	154.797	394.436	63.4049	2.38495	2.38495	68.7313	42.7586	205.37	157.198	178.391	5.07228	154.07	1.8851
ATP5G2	112.324	57.8395	460.424	68.034	510.175	65.6092	1010.43	849.214	233.158	118.747	219.877	57.2553	186.41	6.19537	194.764	1.50562
ATP5G3	11.0419	4.92115	31.9386	7.63129	30.3905	7.2093	29.1948	14.8991	7.51127	4.2876	3.12946	0.470634	317.836	3.65405	332.381	12.3206
ATP5H	727.862	434.443	634.332	105.562	470.802	68.7859	230.283	180.342	255.66	86.7053	86.8282	51.3731	271.644	4.65762	284.637	5.0318
ATP5I	4214.26	1824.33	2811.46	504.265	2309.25	250.493	721.329	715.493	891.006	354.058	165.635	28.1967	426.754	17.5594	465.254	5.36906
ATP5J	632.871	402.079	1221.1	182.075	995.153	111.531	180.072	180.072	646.894	349.074	153.745	37.4037	279.072	3.34313	321.502	5.99096
ATP5J2	203.082	120.282	1062.5	151.466	547.528	68.7024	1592.37	808.901	407.08	207.748	106.036	40.4599	393.82	8.74809	413.643	6.87374
ATP5J2-PTCD1	3.06577	1.57383	3.55319	1.06887	4.30692	2.12628	2.36969	2.13734	1.60487	1.27815	0	0	0	0	0	0
ATP5L	149.885	82.9483	137.715	42.056	75.588	16.0613	59.0078	25.9311	51.3349	21.5986	17.0407	11.7339	416.862	3.68102	524.245	1.33576
ATP5L2	0.156422	0.156422	0	0	0	0	0	0	0	0	0	0	0.0601386	0.0268991	0	0
ATP5O	363.601	149.082	711.591	118.971	786.931	112.058	193.765	138.169	400.248	150.508	77.864	19.9204	141.779	5.03812	132.099	3.28645
ATP5S	3.66329	2.76551	13.724	5.72363	3.84222	1.50953	0	0	0	0	11.5473	11.5473	6.78995	0.24132	8.28485	0.178923
ATP5SL	30.7799	30.7459	12.2189	6.23395	60.8339	29.6448	0	0	0.701074	0.701074	5.68328	3.62267	52.3107	0.999785	49.1903	0.595153
ATP6AP1	81.9857	65.4362	40.5684	15.7405	31.2058	13.0843	86.6809	80.4259	41.5655	41.1199	22.8437	16.4784	157.118	1.09044	284.701	11.697
ATP6AP1L	0.844616	0.844616	0.72814	0.575879	1.11954	1.06998	0	0	0.797936	0.797936	0.340645	0.340645	0.489267	0.0572235	0.69531	0.0359513
ATP6AP2	22.2266	18.3232	62.4251	29.4939	37.0184	15.2939	79.8496	59.2587	31.2941	25.7999	3.98684	1.6378	232.042	4.8159	358.442	2.25521
ATP6V0A1	12.856	7.06362	21.1401	18.9032	14.1486	6.25603	0	0	17.3098	8.24214	44.5762	5.57624	16.1451	0.702709	56.7005	4.26843
ATP6V0A2	0.0691765	0.0407826	0.537592	0.239378	1.6201	0.938283	16.0116	15.9804	0.200631	0.194092	13.6035	7.93105	9.75609	0.453851	14.5804	0.924388
ATP6V0A4	0	0	1.01046	1.01046	0	0	0	0	0	0	0	0	0.100407	0.0187797	0.139159	0.0440038
ATP6V0B	396.316	168.779	372.752	95.9167	709.904	150.118	1853.8	592.452	317.813	188.695	224.204	193.061	153.83	5.88398	252.948	3.01771
ATP6V0C	151.461	85.3312	51.7961	18.982	59.4138	40.9869	70.4002	66.1534	13.6585	6.26648	15314.3	2579.22	57.9531	1.36122	70.118	2.85495
ATP6V0CP3	0	0	0	0	0	0	0	0	0	0	0	0	0	0	0	0
ATP6V0D1	12.4837	8.42758	193.562	49.276	168.12	56.5849	124.229	65.061	14.6691	14.6691	6.51401	2.18046	107.395	0.323374	95.1658	0.646502
ATP6V0D2	0	0	0	0	0.0293955	0.0204336	0	0	0.0786684	0.0786684	0	0	1.63197	0.14695	0.290009	0.0712358
ATP6V0E1	270.579	116.769	880.813	126.212	724.584	80.4078	1113.79	978.306	2157.01	594.276	1035.69	449.676	887.469	5.41158	1467.73	14.7897
ATP6V0E2	0	0	4.3358	3.95216	3.64921	2.77709	0	0	0	0	2.19242	2.19242	23.9209	1.71456	35.9245	3.80308
ATP6V0E2-AS1	0	0	0	0	3.41297	3.41297	0	0	0	0	0	0	0	0	0	0
ATP6V1A	1.15305	0.45419	21.5744	8.39083	10.4478	2.7804	29.1895	15.6772	19.2594	7.76239	8.71664	1.03561	93.8418	2.30268	141.245	1.67051
ATP6V1B1	4.16357	2.29267	174.719	63.0045	99.4402	38.2892	0	0	0.597308	0.597308	3.33341	2.35212	0.40464	0.0720738	0.931273	0.145725
ATP6V1B2	27.7479	24.8665	28.1536	8.21274	51.4853	15.0282	165.953	164.234	84.7136	44.2437	2.37102	0.634356	146.158	3.88323	144.568	3.38817
ATP6V1C1	7.71646	3.96753	8.7083	5.31948	8.86414	2.32819	133.593	133.001	6.80316	5.09879	14.4171	1.48888	61.8348	0.409274	76.6765	0.589848
ATP6V1C2	137.409	71.3346	92.509	11.9646	94.42	20.5029	73.6148	51.1099	13.3643	9.60032	107.678	7.0456	0.12393	0.0195822	0.150733	0.0121177
ATP6V1D	58.8843	32.8822	54.9517	13.8429	82.8545	20.2384	50.4943	50.4943	142.888	80.9146	18.4211	11.9242	249.721	7.48228	215.125	2.05075
ATP6V1E1	726.623	454.093	250.933	56.0197	203.972	42.6086	63.3096	36.6952	87.3999	53.8543	47.937	2.76637	250.105	9.04745	362.983	10.1199
ATP6V1E2	0	0	0	0	6.53647	4.50413	0	0	0	0	0	0	5.48713	0.107189	5.05637	0.195411
ATP6V1F	113.339	79.6962	403.233	142.96	314.422	79.3011	245.902	76.5652	350.152	109.281	2146.65	381.65	187.893	2.0724	262.866	2.37058
ATP6V1G1	89.6097	27.0682	156.057	39.8387	115.404	18.4756	41.0935	11.3995	71.0288	37.2934	7.28418	0.1197	432.531	10.8539	628.734	5.83614
ATP6V1G2	0	0	0	0	0	0	0	0	0	0	0	0	0.0890538	0.0330065	0.293794	0.0771312
ATP6V1G3	0	0	0	0	0	0	0	0	0	0	0	0	0	0	0	0
ATP6V1H	85.1109	59.6357	42.7934	10.8617	56.3244	21.1164	0.637228	0.416177	11.4694	7.30023	8.52612	5.98883	104.142	3.30099	113.298	1.82616
ATP7A	1.70596	1.47231	0.252242	0.107535	0.173095	0.0576756	0.119295	0.118821	6.46621	2.91045	1.27572	0.31371	0.805339	0.0167586	1.28318	0.038362
ATP7B	60.7396	43.0254	10.2881	5.10965	10.2997	3.77383	0.143497	0.143497	1.26697	0.784897	40.1997	5.82127	0.771594	0.0366578	0.944089	0.0707289
ATP8A1	0.0138389	0.0138389	0	0	0	0	0.0277697	0.0277697	0	0	1.46554	0.52663	0.36306	0.0976213	7.49153	0.0984303
ATP8A2	0	0	1.30048	1.30048	0.0690763	0.0690763	0	0	0	0	0.108036	0.108036	0.0042224	0.00134385	0.0197822	0.00556885
ATP8B1	0.221802	0.11299	1.36978	0.821811	7.20599	4.94284	0.0778938	0.0778938	4.9564	4.1743	3.0276	0.0851714	32.2151	0.71204	2.3328	0.416111
ATP8B2	2.54688e-05	2.54688e-05	0.0670311	0.0517106	0.0480869	0.0337113	0	0	0.351139	0.351139	0	0	22.9551	0.412438	49.9363	4.81308
ATP8B3	0.0382275	0.0379219	0.0786974	0.0786974	0.584132	0.528618	0	0	0	0	0	0	0.832698	0.0148532	0.889538	0.0375993
ATP8B4	14.6678	14.6678	3.27171	3.08854	1.4607	1.4607	0	0	0.560146	0.560146	17.3929	7.18708	0.329556	0.0580214	7.64742	1.09768
ATP8B5P	6.35249e-05	5.26792e-05	0.0314982	0.0314747	0	0	0	0	0	0	0	0	0	0	0	0
ATP9A	0.034517	0.0277113	1.22127	0.974054	0.0805684	0.0722599	0	0	1.56057	1.56057	1.78678	1.78678	4.95585	0.446146	6.37669	0.195529
ATP9B	242.457	149.037	133.461	31.8501	163.376	19.5827	78.5449	58.3965	151.447	30.4199	7618.99	853.418	9.11802	0.177608	13.2736	0.336905
ATPAF1	25.5192	7.5689	21.0422	8.6753	9.72993	3.83037	1.21039	0.71426	0.250091	0.250091	14.6119	5.75763	38.8023	0.219368	34.91	1.46117
ATPAF2	0	0	34.1164	23.6964	35.5612	20.5371	14.1073	14.1073	0.585007	0.585007	2.78743	2.78743	16.9983	0.545755	16.378	0.199277
ATPIF1	334.645	157.886	616.945	137.407	622.807	121.106	51.3545	28.8394	314.31	141.377	1021.26	745.657	285.969	1.64342	241.257	8.30136
ATR	0.0574815	0.0329295	3.82918	1.47259	7.96009	5.13368	0.296892	0.296892	3.04601	3.04601	7.06636	1.07777	11.1595	0.643611	8.42147	0.33013
ATRAID	0.802029	0.397616	202.352	44.6232	192.429	33.3259	147.149	92.6457	208.157	93.3779	83.081	66.0147	103.161	4.1388	208.889	12.7085
ATRIP	26.7934	22.4055	1.52687	1.39389	17.8422	17.1146	0	0	0	0	4.90443	0.427436	3.72344	0.171131	1.02166	0.0336885
ATRN	0.221605	0.135234	3.53846	1.50396	0.823222	0.406247	0	0	13.9083	13.9083	3.0062	0.94599	4.02576	0.0568775	7.21885	0.0462911
ATRNL1	0	0	0	0	0	0	0	0	0	0	1.16031	0.897903	2.86468	0.0696131	11.3603	1.12231
ATRX	308.026	204.337	47.4078	15.9899	32.8965	7.83006	99.1073	97.9861	62.4974	35.9389	24.59	4.09455	31.4588	0.495459	41.1615	1.13356
ATXN1	0.0156863	0.0156863	3.0233	1.26117	3.93288	1.64091	0	0	1.26216	0.987347	4.55342	0.835342	19.4863	0.945006	33.6707	0.358346
ATXN10	1.04705	0.805668	20.671	6.49447	15.7165	5.70753	18.6933	14.1802	25.101	13.6546	20.2432	10.2929	176.713	3.11462	215.552	3.72924
ATXN1L	0.568496	0.353217	1.03498	0.740954	1.97509	1.32914	0	0	0.0358369	0.0358369	2.75248	0.687918	9.10731	0.120961	10.9446	0.215023
ATXN2	24.3891	11.1049	23.9701	11.2391	10.0621	2.5483	0.292373	0.292373	44.0721	16.47	117.321	16.8513	14.9197	0.0811849	19.1116	0.61052
ATXN2L	5.81094	5.67208	3.30217	1.56914	0.687072	0.298224	1.74104	1.74104	0	0	146.32	10.5896	86.889	2.63062	49.4937	0.897052
ATXN3	0.0939648	0.0604251	33.0122	16.6148	58.5768	31.7563	0.00124937	0.00124937	32.9957	32.4481	74.9247	11.7181	20.0021	0.277415	23.5368	0.365058
ATXN3L	0	0	0	0	0	0	0	0	0	0	0	0	0	0	0	0
ATXN7	173.375	124.864	5.43486	2.79069	15.0334	10.804	0.393658	0.199051	3.23908	2.40465	314.029	70.2614	16.667	0.510562	14.9366	0.145402
ATXN7L1	0.00587715	0.00587715	18.5449	13.3507	23.1715	18.6196	3.10602	3.10602	0	0	2.0164	0.742439	2.2541	0.148933	6.53117	0.100268
ATXN7L2	0.31903	0.31903	2.09887	2.09887	0	0	0	0	0.425903	0.425903	4.11134	4.11134	2.20598	0.0397577	1.0006	0.0145346
ATXN7L3	25.3864	10.3325	14.2377	8.10345	5.62501	3.83883	1.45871	0.732462	3.14864	2.32145	7.16011	4.0937	167.107	0.644529	164.964	0.967116
ATXN7L3B	5.66966	2.56797	29.1045	7.26511	39.8581	8.42999	0.258165	0.258165	5.09175	3.82002	4.63105	0.469749	77.4469	2.48121	104.528	0.920986
ATXN8OS	0	0	0	0	0	0	0	0	0	0	0	0	0	0	0	0
AUH	12.8419	11.9806	4.82725	2.8258	7.89612	5.56148	0	0	5.10224	3.08585	30.3858	4.81181	8.59057	0.152143	12.6554	0.635809
AUNIP	0.0799248	0.0799248	5.02542	2.2349	7.5106	1.84468	0	0	3.57244	2.64522	1.59216	1.59216	7.44771	0.304254	0.333604	0.0410225
AUP1	70.2757	50.0558	121.331	54.3254	117.593	40.8037	102.948	102.948	41.7493	36.8776	183.732	58.5404	72.2952	3.20102	76.1334	2.30965
AURKA	1.02445	0.711603	4.51791	3.4037	12.7354	9.41901	0	0	16.0319	15.264	2.13057	2.13057	51.3242	1.7071	2.63393	0.237751
AURKAIP1	423.686	272.618	880.972	273.556	541.937	122.454	0	0	11.8375	10.2518	24.6448	9.02512	153.978	1.23918	108.727	2.78178
AURKAPS1	7.20265	5.48891	1.81154	1.30812	0.90962	0.804441	3.16923	3.16923	0.862029	0.862029	9.25261	2.43439	0	0	0	0
AURKB	0	0	11.4892	9.93233	29.9412	24.2719	0.979429	0.979429	0	0	0	0	95.5202	2.56903	0.850957	0.0970397
AURKC	0	0	0	0	20.0827	20.0827	0	0	0	0	0	0	0.231189	0.0166328	0.268892	0.0252835
AUTS2	94.1126	89.5062	0.704792	0.377261	2.51862	0.960261	0.209513	0.209513	0.110895	0.110895	9.476	7.3992	11.0582	0.413461	5.74915	0.0528837
AVEN	22.4151	20.9879	11.0157	7.50648	12.5167	7.60423	16.6413	16.6413	27.4662	25.2499	7.70477	2.27284	73.0689	0.564699	57.5284	0.333843
AVIL	1.09787	1.09787	0	0	0	0	0	0	0	0	1.10427	1.10427	0.274374	0.018001	0.144697	0.0108475
AVL9	0.0273633	0.0273633	1.7141	0.98981	0.0854748	0.0854748	0	0	0	0	36.5446	7.84042	21.7652	0.466814	31.2338	0.926439
AVP	0	0	0	0	0	0	0	0	0	0	0	0	0	0	0.0241409	0.0164723
AVPI1	4.358	3.96818	189.117	67.5804	219.55	61.8512	0	0	7.54748	7.54748	43.5991	43.5991	20.794	0.744373	64.4417	3.82492
AVPR1A	0.0164167	0.0112931	0.00754227	0.00548887	0.0266555	0.0187508	0.0443548	0.0443548	0.424108	0.424108	0	0	0.00498163	0.00340694	0.0159663	0.00772835
AVPR1B	2.85398	2.85398	0	0	0	0	0	0	0	0	0	0	0	0	0	0
AVPR2	0	0	0	0	0	0	0	0	0	0	0	0	0.0120394	0.00277303	0.0186683	0.00445736
AWAT1	0	0	0	0	0	0	0	0	0	0	0	0	0	0	0	0
AWAT2	0	0	0	0	0	0	0	0	0	0	0	0	0	0	0	0
AXDND1	0.0249789	0.0249789	0	0	1.36156	1.13045	0	0	0.414575	0.414575	0	0	0.0180604	0.0063358	0.0183068	0.002745
AXIN1	0.818495	0.818495	12.5817	10.023	0.472476	0.401684	0	0	4.74864	4.74864	5.09961	3.98885	3.37425	0.0591252	2.534	0.136357
AXIN2	30.5584	28.8326	9.2891	4.81106	8.51127	5.71073	0	0	4.8342	2.96462	1.79091	1.43394	0.184373	0.0052332	1.21369	0.0959461
AXL	51.6573	38.023	18.5794	13.8248	11.806	6.40191	266.374	233.351	0.376863	0.332643	19.6575	4.52707	95.0041	4.65348	33.5226	0.943171
AZGP1	3.04726	2.83951	0	0	0	0	0	0	0	0	0	0	0.0102721	0.00702509	0	0
AZGP1P1	0.63316	0.366977	1.14378	0.637152	1.21703	0.65342	0	0	0	0	0	0	0	0	0	0
AZI2	11.0278	7.46726	6.49503	3.08507	14.1049	5.15627	1.14028	0.571498	9.09723	4.52055	30.3139	2.94761	64.2181	0.752639	77.0457	2.84031
AZIN1	81.2196	29.9261	55.3555	12.7488	50.7477	9.21186	14.804	7.45759	32.354	20.496	22.7776	6.40459	379.062	2.00599	338.053	13.4991
AZU1	0.755465	0.742994	1.10527	0.685791	0.714404	0.411995	84.5574	84.5574	0.000955365	0.000952991	0	0	0.0604021	0.0140513	0.119195	0.0209354
B2M	1713.54	798.952	1213.06	226.122	1060.87	206.292	4653.73	1414.57	3984.08	1416.38	160.936	1.25376	7046.53	846.684	9976.14	987.927
B3GALNT1	0.167336	0.132442	16.4555	8.79875	0.377262	0.209825	2.40344	2.40344	0	0	4.93333	1.79527	58.0432	1.5461	13.3567	0.430864
B3GALNT2	3.32768	2.11361	41.7584	9.02198	39.899	8.33333	0	0	0.00286485	0.00286485	1.12573	0.466955	11.6335	0.0866698	22.6671	0.55713
B3GALT1	0	0	0	0	0	0	0	0	0	0	0	0	0.341342	0.0554981	0.242259	0.0483087
B3GALT2	21.8267	21.4828	2.42372	2.4132	0.0224772	0.0224772	0	0	4.95915	3.20196	0.548234	0.320913	0.883199	0.0244095	1.20185	0.233985
B3GALT4	0.691993	0.691993	1.23054	1.23054	6.49309	5.25099	0	0	0	0	0	0	0.073133	0.0270868	0.124587	0.0122975
B3GALT5	0	0	0	0	0	0	0	0	0	0	0	0	0.0425358	0.00701243	0.0470669	0.00422875
B3GALT6	0	0	0.166701	0.166701	0	0	0	0	0.932056	0.932056	0.165596	0.165596	17.8487	0.689801	13.5302	0.213376
B3GALTL	0	0	0	0	0	0	0	0	5.86654	5.86654	0	0	0	0	0	0
B3GAT1	0	0	0	0	0	0	0	0	0	0	0	0	0.00456305	0.00311368	0.00266443	0.0019595
B3GAT2	0	0	7.63324	7.6287	28.4573	27.7483	5.47915	5.47915	0	0	2.10301	2.10301	0	0	0.0312334	0.00139651
B3GAT3	106.057	66.6003	52.5547	34.2841	2.3831	1.76491	101.272	101.272	5.49402	5.49402	3.37256	3.37256	37.017	0.47047	49.4256	1.10432
B3GNT2	10.8653	7.38185	13.3861	7.85432	14.3896	5.24773	3.66267	3.66267	4.02943	4.02943	6.52547	2.62957	5.96316	0.220483	14.5484	1.46019
B3GNT3	26.0158	23.7367	78.581	38.3206	19.6922	6.79028	0	0	18.7818	8.01038	19.4211	10.2666	0	0	0	0
B3GNT4	0	0	0	0	0	0	0	0	0	0	0	0	0.0862349	0.00933642	0.0255948	0.00755398
B3GNT5	19.7463	14.2422	10.8797	4.16386	20.0759	7.1281	6.11727	6.11727	0.0399705	0.0399705	3.07689	0.0374247	18.6552	2.43687	17.5423	2.51668
B3GNT6	8.90697	6.46036	0.237255	0.141454	0.0271412	0.0271412	0	0	0.0285159	0.0285159	0	0	0	0	0	0
B3GNT7	4.08502	2.39975	19.3052	19.2513	0.159902	0.159902	1.69408	1.69408	2340.34	1174.4	0.585641	0.585641	0.102581	0.0160082	0.200175	0.027574
B3GNT8	0	0	0.904124	0.904124	0	0	0	0	0	0	0	0	0.263071	0.0112329	0.477977	0.0186377
B3GNT9	0.258136	0.258136	5.21474	3.55324	6.80557	6.37843	0	0	4.14986	4.14986	13.8932	4.67524	15.9885	0.314461	23.4078	1.23948
B3GNTL1	0.803344	0.803344	4.81236	1.723	3.54361	1.50854	67.0079	67.0079	2.50938	2.50938	0.690634	0.690634	5.33246	0.11514	2.55852	0.138556
B4GALNT1	0	0	0	0	0	0	0	0	0	0	0	0	26.9615	0.243556	20.093	0.350347
B4GALNT2	0	0	0	0	0	0	0	0	0	0	0	0	0.0211832	0.00270773	0.0152145	0.00168019
B4GALNT3	0	0	0	0	0	0	0	0	0	0	0	0	0.00922094	0.00288568	0.00611598	0.00147146
B4GALNT4	0	0	0	0	0	0	0	0	0	0	0	0	1.06542	0.233775	2.03522	0.155269
B4GALT1	213.108	62.0917	546.513	60.629	561.278	64.3689	351.827	199.375	444.971	129.024	59.9245	23.6712	165.912	0.841564	287.096	15.5334
B4GALT1-AS1	0	0	5.6066	4.3782	1.60539	1.60539	0	0	0	0	0	0	0	0	0	0
B4GALT2	0	0	0.0954334	0.0766022	0	0	0	0	10.0983	9.98355	1.38096	1.38096	64.9379	0.797958	67.335	1.31064
B4GALT3	87.9498	77.1224	84.6802	44.4911	24.4873	11.9053	0	0	1.0422	0.642137	19.8426	0.87626	36.8451	1.31837	43.7746	1.16058
B4GALT4	15.8381	13.3535	28.448	10.7402	64.4656	41.4156	0.656226	0.656226	19.7516	11.2619	14.8549	11.1724	102.867	0.751245	130.552	1.59169
B4GALT5	10.6591	9.12698	9.0893	2.8721	5.89302	2.07969	17.8532	12.7174	6.8509	5.10249	5.03692	0.398928	21.9087	0.419364	26.8871	0.2512
B4GALT6	0.00892085	0.00892085	0	0	0.0189307	0.0189307	0	0	0	0	1.87888	0.771139	3.02224	0.312417	1.14995	0.100552
B4GALT7	11.0649	9.76787	13.9611	13.8701	50.2476	28.6739	0	0	5.28612	5.0313	0	0	20.3718	1.81831	32.5152	1.25638
B9D1	0.118817	0.118817	59.7129	48.0569	0	0	10.4311	10.4311	0	0	0	0	7.06939	0.493793	27.266	1.20694
B9D2	0	0	0.343499	0.239254	2.44136	2.44136	0	0	0	0	0	0	8.04786	0.260059	6.64865	0.0852779
BAALC	0	0	0.144053	0.144053	0	0	0	0	0	0	0.32268	0.32268	0.872358	0.0973359	0.104858	0.028385
BAAT	0	0	0	0	0	0	0	0	0	0	0	0	0.0166249	0.00384637	0.00617826	0.00293217
BABAM1	130.801	72.7775	116.288	38.3883	48.8519	23.0092	0	0	2.56403	2.56403	41.2268	18.8936	47.3738	0.537695	45.5777	0.717065
BACE1	0.117934	0.0688868	4.43141	3.12667	0.0984657	0.0620957	0	0	0.859798	0.782878	4.29743	1.78769	93.711	1.52005	59.8881	3.14022
BACE2	17.5863	9.59514	3.97403	1.42963	5.40502	1.88989	0	0	1.85168	1.09123	3.05544	1.25465	31.5439	1.54364	20.6684	2.0999
BACH1	10.921	8.70294	5.15739	1.8879	22.4776	7.31221	2.99203	2.62443	17.1854	8.31916	29.2474	6.08521	58.4081	1.05238	80.8271	6.77916
BACH1-IT2	0	0	0.462382	0.462382	0	0	0	0	0	0	1.06726	1.06726	0	0	0	0
BACH2	0	0	0.053216	0.053216	0	0	0	0	0	0	7.06443	5.23787	0.100361	0.0125111	0.711568	0.0554015
BAD	79.9476	54.9961	924.97	395.518	288.267	112.718	70.0057	70.0057	9.5748	9.5748	64.5556	64.5556	143.405	2.34605	156.771	2.6818
BAG1	28.6365	19.8471	11.1935	3.63836	29.5895	6.73726	0.287526	0.287526	13.3257	9.79326	0.715183	0.300055	43.7683	1.53353	31.4739	1.03897
BAG2	3.96404	2.1393	29.3142	15.337	19.2045	6.8987	5.42233	5.42233	0	0	2.24581	0.37742	105.478	3.81145	83.9198	2.24086
BAG3	22.0883	12.1926	105.163	33.6781	161.903	47.555	7.87357	7.87357	250.239	129.168	10.4962	6.29688	44.572	0.794332	46.7624	0.9699
BAG4	95.6432	71.7736	51.5926	10.3265	23.5349	4.65518	1.33462	1.33462	46.4111	15.6866	4.66099	0.181643	22.5736	0.690109	23.0948	0.248778
BAG5	6.29422	6.23185	15.0991	6.11192	10.64	3.66639	0.0624735	0.0624735	23.6523	18.4141	24.2606	12.3926	15.9521	0.459521	13.3439	0.470512
BAG6	81.9576	70.0767	44.1881	23.4929	23.3446	9.12563	4.79642	4.79642	28.1013	27.0703	22.3171	0.155067	2.60128	0.0851398	1.88305	0.0985049
BAGE2	0.0072122	0.00704646	0	0	0	0	0	0	0.000769147	0.000769147	0	0	0	0	0	0
BAHCC1	0	0	0	0	0	0	0	0	0	0	0.569845	0.569845	0.0276087	0.00494171	0.0340545	0.00309445
BAHD1	6.71409	6.43763	1.03574	0.715899	0.974539	0.511402	0	0	0	0	3.426	2.26163	3.45425	0.150378	2.74652	0.0381282
BAIAP2	85.757	34.9549	47.4021	14.8437	96.8098	81.7052	0	0	3.02706	2.23793	12.878	0.373275	27.8891	5.16852	15.3569	1.23996
BAIAP2-AS1	0.0331519	0.0229228	0.030748	0.0307478	0.304817	0.125117	0	0	0	0	0	0	0	0	0	0
BAIAP2L1	2.17722	1.314	2.70766	1.80881	4.70497	3.35578	0	0	24.908	12.7194	5.37273	2.67042	15.8134	1.95765	8.09973	0.403969
BAIAP2L2	0	0	0	0	0	0	0	0	0	0	0	0	8.09898	0.587332	0.477028	0.0186819
BAIAP3	0.185911	0.185911	0.996932	0.731467	2.00995	0.756331	3.64809	3.64809	0	0	0.702136	0.702136	0.136346	0.0125171	0.452059	0.068454
BAK1	1.25251	1.11599	0.796336	0.510118	3.54391	3.54391	1.48258	1.48258	0	0	1.01421	1.01421	20.3994	0.273128	16.4203	0.344737
BAMBI	14.0271	5.58954	3.09354	2.00913	35.2085	16.5868	1.60256	1.60256	1.57195	1.07388	19.2633	19.2633	5.50344	0.0952797	43.7919	0.665525
BANF1	84.9841	44.4809	242.388	65.2454	296.971	76.1557	317.383	231.506	252.45	111.977	15.4691	4.54576	635.602	3.54021	305.332	4.91786
BANF2	0	0	0	0	0	0	0	0	0	0	0	0	0	0	0	0
BANK1	0	0	2.03264	1.45999	0.0130676	0.0130676	0	0	11.4706	11.4706	9.81391	9.81391	0.585107	0.0118291	0.314536	0.0255087
BANP	15.3934	6.03766	8.63726	4.19701	26.9407	9.27308	35.8	31.3818	3.76527	2.35616	5.40831	0.383788	15.8548	0.393654	12.6791	0.265053
BAP1	7.46759	4.86891	0.743008	0.346748	8.61517	4.17225	0	0	92.1952	61.9072	15.4077	6.20599	45.5649	0.489131	41.1057	0.584226
BARD1	12.0297	8.38055	12.558	6.61723	17.0241	5.87701	0.954742	0.954742	2.71722	2.18159	0.897276	0.366784	26.56	0.837966	1.55987	0.0609838
BARHL1	0.733564	0.733564	0	0	0	0	0	0	0	0	0	0	0	0	0	0
BARHL2	0	0	0	0	0	0	0	0	0	0	0	0	0	0	0	0
BARX1	0	0	0	0	0	0	0	0	0	0	0	0	0.00579153	0.00396083	0.0257671	0.00718429
BARX2	5.05167	3.79495	4.90199	2.30252	5.68223	2.76282	0	0	0	0	1.13736	1.13736	0	0	0	0
BASP1	27.3481	12.8792	75.634	25.7081	28.0784	7.69453	42.6584	40.7119	41.3263	10.9736	567.97	12.5328	195.411	2.32349	493.13	16.7818
BASP1P1	0	0	0	0	0	0	0	0	0	0	0	0	0	0	0	0
BATF	0	0	0	0	0	0	0	0	0	0	1.23772	1.23772	0	0	0	0
BATF2	0.169119	0.169119	0	0	0	0	0	0	0.598348	0.598348	1.29112	1.29112	0.938776	0.222646	1.5756	0.223178
BATF3	0	0	0	0	0	0	0	0	73.5371	58.6973	0	0	0.545755	0.108815	0.46658	0.16542
BAX	1.53147	1.53147	0	0	0	0	0	0	1.58061	1.58061	6.6467	6.6467	220.712	7.11848	154.564	0.803264
BAZ1A	31.7417	13.943	45.4746	13.9335	35.2751	10.0931	118.508	58.9055	22.3758	3.99666	6.63361	1.50598	42.9618	0.292538	22.5104	0.58776
BAZ1B	27.6536	8.88397	31.8227	11.0832	45.1504	16.1116	46.2536	41.2176	50.5756	19.6461	40.9725	11.0751	0.380066	0.00351487	0.142612	0.00686826
BAZ2A	14.3352	4.56129	15.5409	5.57769	23.4788	10.7106	0.781674	0.663882	3.56609	2.13615	99.5852	1.89039	35.0376	0.548913	41.4981	0.448898
BAZ2B	80.5191	41.3185	8.21166	3.85792	12.6079	4.50145	1.51995	0.210043	40.8611	36.2207	289.748	26.9905	7.02382	0.0769103	14.6534	0.592799
BBC3	32.488	31.9987	0.330766	0.330766	2.73592	2.46177	0	0	0	0	4.14315	4.14315	6.39639	0.377576	4.83553	0.193321
BBIP1	134.924	78.8884	156.747	31.1934	178.861	19.0797	13.405	11.6689	186.767	28.1156	19.956	1.42342	88.0735	2.41146	123.909	2.03367
BBOX1	0	0	0	0	0	0	0	0	0	0	0.263312	0.0296283	0	0	0.0332389	0.016089
BBS1	0.106079	0.106079	0.884271	0.49796	5.77576	3.20335	0	0	0	0	2.5592	1.13681	0.638277	0.02133	0.698384	0.0467107
BBS10	0.00391685	0.00391685	0.0859492	0.071461	0.165902	0.0803825	0	0	0	0	7.33583	3.78366	5.00804	0.0856988	6.39587	0.207759
BBS12	0.570119	0.510224	4.18261	2.88316	1.10662	0.852952	0	0	0	0	3.51735	2.64787	0.541933	0.00770934	1.20009	0.0455626
BBS2	2.43864	1.71285	24.3575	17.3934	4.32472	3.70207	0	0	6.34563e-06	6.34563e-06	0.556613	0.413933	22.4349	0.272281	33.5648	1.15379
BBS4	0	0	0.845187	0.819357	5.78821	4.83538	0	0	0.183013	0.183013	3.30556	2.09419	12.9205	0.348585	20.7867	0.209625
BBS5	7.25389	3.32184	0.071421	0.0714208	1.15034	0.674817	4.23962	4.23962	1.00069	1.00069	0	0	5.46077	0.287666	5.21357	0.371921
BBS7	0	0	0	0	0.538847	0.538847	0	0	0	0	2.41218	1.67809	20.9841	0.637516	20.3367	0.690556
BBS9	8.41716	8.41716	6.46453	4.81782	1.52099	1.10662	0	0	0.592289	0.592289	7.26581	1.63537	4.74698	0.172597	9.31931	0.0353416
BBX	241.205	86.1342	83.0599	18.3328	82.1936	19.6502	25.6926	22.606	56.3075	25.6429	157.202	137.603	69.0014	0.652193	92.1453	2.79556
BCAM	0	0	8.0306	4.95781	19.346	9.61449	0	0	0	0	41.4199	41.4199	13.1064	1.4736	16.8677	1.18559
BCAN	0.126633	0.126633	0	0	0	0	0	0	0	0	0	0	0.0125644	0.00384383	0.00666213	0.00160299
BCAP29	3.00232	2.71737	5.34222	1.78271	3.10998	0.652392	2.18319	2.069	8.06426	2.638	5.49221	0.458585	101.76	5.14307	59.5071	1.67244
BCAP31	852.388	287.653	1208.46	205.82	1178.54	186.74	1475.51	748.777	947.315	363.955	47.51	34.4575	231.143	6.70447	317.246	0.951754
BCAR1	5.42143	3.75452	14.2821	8.65554	3.22658	1.19911	0	0	5.41183	5.11617	3.22664	0.0169301	32.5801	0.858542	17.3183	0.541616
BCAR3	71.1459	46.9371	31.2469	12.6808	44.1035	15.5278	0	0	40.6608	24.7809	22.0998	12.9797	37.9979	1.48818	10.417	0.355219
BCAR4	47.9543	41.297	65.7202	28.7764	14.5595	11.2222	0.637646	0.637646	539.335	240.705	38.12	11.9828	0	0	0	0
BCAS1	1.35142	1.28737	0	0	0.0141526	0.0141526	0	0	0	0	0.171252	0.171252	0	0	0.00373744	0.00254948
BCAS2	74.8291	48.8422	36.896	21.2305	32.717	14.8601	0	0	0	0	25.3132	12.4742	58.4747	0.351757	48.9208	0.752953
BCAS3	0.528755	0.312838	5.44194	3.71844	8.34846	4.19612	0	0	40.0229	33.9855	27.7421	20.5178	5.91358	0.173713	12.8986	0.666349
BCAS4	156.137	154.793	55.6761	52.8202	26.1983	10.1999	1392.62	786.9	59.5719	31.7095	48.1445	1.52132	13.3888	0.912884	9.46934	0.140766
BCAT1	1.53378	0.962692	8.15112	2.59785	16.9885	4.06393	17.1653	8.98858	12.1573	10.4711	2.75171	0.0986085	111.501	3.01869	71.1631	5.08094
BCAT2	25.5791	15.2445	126.248	61.8088	91.0212	50.6613	5.74393e-07	5.74393e-07	2.20754	2.20754	0	0	12.4349	0.335237	9.41705	0.177278
BCCIP	100.597	60.8317	48.7999	22.6401	48.6149	19.4433	5.56437	3.34694	32.639	14.4578	3.03236	0.0266268	40.4133	0.56945	26.0972	0.652615
BCDIN3D	2.32587	1.78924	3.32795	2.06542	2.75573	1.03277	1.2188	1.2188	1.02601	0.61235	0.597754	0.597754	3.40443	0.0612333	4.79914	0.0519148
BCDIN3D-AS1	0.0131382	0.0131382	1.04946	0.915641	0.0705923	0.0580518	0	0	3.58847	3.58847	0	0	0	0	0	0
BCHE	0	0	0	0	0	0	0	0	0	0	0	0	1.87826	0.0463693	1.9411	0.267595
BCKDHA	1.70263	1.61565	2.5506	1.75905	55.3134	31.6662	13.1013	12.8767	4.20261e-05	4.20261e-05	14.4779	14.4779	0.647566	0.0276587	0.680069	0.0372566
BCKDHB	0.0208868	0.0187938	1.12416	0.672586	13.1727	12.6012	0	0	0	0	1.65622	0.428722	15.9466	0.147118	15.7025	0.172833
BCKDK	17.6438	17.1522	20.2377	14.3884	64.1524	31.234	304.817	302.994	1.71248	1.71248	16.5296	16.5296	24.6403	0.626564	20.1492	0.151193
BCL10	5.00531	2.9286	18.4024	7.68926	29.8088	9.12019	31.0348	30.5424	32.0258	21.6883	12.4614	1.69131	18.1425	0.814533	16.3688	0.1223
BCL11A	0	0	0	0	0	0	0	0	0	0	0.238468	0.238468	0.201247	0.00694363	0.211526	0.00847359
BCL11B	0	0	0	0	0	0	0	0	0	0	0.446539	0.446539	0.000341852	0.000233793	0.00116966	0.000448402
BCL2	1.81151	0.6587	26.595	22.4573	42.6023	19.6346	0	0	0	0	8.97733	2.9109	8.85187	0.819194	1.2334	0.0584749
BCL2A1	0	0	0	0	0	0	498.143	250.939	0	0	1.60442	1.60442	0.0905752	0.0101002	0.0147225	0.0100429
BCL2L1	0.815397	0.624707	28.1575	12.5493	15.5537	10.4545	24.7484	24.7484	8.66936	8.66936	15.4652	7.2847	193.34	1.48124	169.686	2.73095
BCL2L10	0	0	0	0	0	0	0	0	0	0	0	0	0.737921	0.135064	3.64205	0.410234
BCL2L11	48.8791	30.832	7.1612	3.12834	6.19061	2.5304	14.5879	14.4217	3.01886	3.01886	2.89727	1.49542	5.95547	0.355776	59.7336	1.11366
BCL2L12	0	0	21.5339	17.5162	7.44146	3.42313	0	0	1.73025	1.73025	9.54648	2.73109	16.965	0.266747	3.54715	0.143592
BCL2L13	97.7095	78.5327	25.8716	10.6727	20.3044	7.1898	0.146806	0.0887226	18.073	17.669	2.56552	1.12264	33.8529	0.839727	22.8695	0.234569
BCL2L14	0	0	0.0267952	0.0267952	0	0	330.973	330.973	0	0	0	0	0.0129131	0.00881661	0.0255695	0.00747731
BCL2L15	0.101662	0.0682328	0.0392259	0.0187837	0.0375321	0.0262836	3.18325e-07	3.18325e-07	0.00319227	0.0019552	0.162056	0.162056	0.782212	0.121471	0.288241	0.0436618
BCL2L2	0.204175	0.13732	0.56992	0.402598	0.843504	0.476705	0	0	0	0	1.12364	0.0239531	117.776	4.9942	171.944	6.37788
BCL2L2-PABPN1	149.897	34.9166	54.3606	15.9622	48.0401	12.0622	39.9279	18.2027	14.4291	5.23955	16.7371	7.42402	0.633638	0.022709	0.641842	0.0353803
BCL3	0	0	0	0	0	0	24.0573	24.0573	0.503892	0.503892	2.82208	2.82208	9.52694	0.601408	21.2313	1.04675
BCL6	17.4384	17.4384	1.59967	1.28525	1.89997	0.825746	1.2128	1.2128	21.7211	21.5193	92.212	44.5183	15.1615	0.445122	22.6928	0.608448
BCL6B	0	0	0	0	0	0	0	0	0	0	2.84868	2.84868	0.0586456	0.0135376	0.0199248	0.0073758
BCL7A	0	0	0	0	1.07993	0.93199	1.23172	1.23172	0	0	0	0	7.73948	0.277521	7.56582	0.170131
BCL7B	42.8472	32.1331	51.733	16.6946	55.6899	26.648	61.7617	61.7617	1.02799	1.02799	10.4672	1.3757	1.11733	0.0179794	0.278987	0.0590262
BCL7C	212.22	194.19	35.6728	22.0395	0.21522	0.21522	13.534	13.534	76.0761	66.5549	0	0	41.5338	0.48203	17.9299	0.443586
BCL9	0.350533	0.350533	1.33067	0.987316	0.517752	0.466483	0	0	2.08432	1.28256	2.0161	2.0161	0.251011	0.0238255	0.247532	0.028074
BCL9L	85.7828	50.6749	7.45278	3.22811	18.0221	7.0569	0.0599376	0.0599376	3.90002	2.16347	13.0963	2.78565	92.1137	3.12008	58.2229	0.581338
BCLAF1	35.1118	11.1041	14.4661	3.75646	26.0421	6.94479	20.6941	19.1616	42.513	11.1357	35.3998	9.77149	75.4939	2.57721	52.9632	1.36349
BCO2	1.12602	1.07267	0.475138	0.367583	0.860788	0.749063	0	0	0	0	8.06475	0.742091	0.120173	0.0211796	0.97637	0.0238329
BCOR	30.1408	29.7428	2.76529	1.40041	3.40421	2.0529	0	0	8.28207	5.55003	27.903	15.1389	2.3069	0.0537974	3.12715	0.0805554
BCORL1	30.5751	11.8686	16.8906	8.30162	19.2077	7.48551	0.39181	0.39181	104.177	62.9757	28.5412	0.146697	0.597242	0.0274671	1.04256	0.0307523
BCORP1	0	0	0	0	0.00924078	0.00924078	0	0	0	0	0	0	0	0	0	0
BCR	290.389	278.252	23.1508	10.8875	13.3974	7.30906	0	0	0.315435	0.315435	5.92494	4.9363	19.3805	0.717391	23.2408	0.638321
BCRP2	0.0244343	0.0244343	0.00338523	0.00250323	0.0292596	0.0225264	0	0	0	0	0	0	0	0	0	0
BCRP3	4.63524	3.57918	0.00610005	0.00609979	0.000609478	0.000609478	0	0	0	0	1.50021	1.16933	0	0	0	0
BCS1L	0.0994723	0.0994723	7.04737	2.77732	50.1908	27.5471	0	0	0	0	0	0	16.8962	0.229227	10.1125	0.390309
BCYRN1	1.08336	1.08336	69.6639	46.1839	39.1043	15.678	0	0	0	0	0	0	0	0	0	0
BDH1	0.0130993	0.0109285	0.888214	0.866361	0.21201	0.191969	0.0887604	0.0887604	0	0	0.408406	0.0132411	10.4753	1.11598	8.58914	0.25913
BDH2	0.100409	0.100409	0.559957	0.340963	0.541713	0.414988	0	0	0.285553	0.22286	0.217259	0.217259	38.4924	1.20954	85.5636	6.31546
BDKRB1	0	0	52.8446	52.8446	0	0	0	0	0	0	0	0	7.21893	0.390098	8.32641	1.69579
BDKRB2	0	0	0.109572	0.109572	0.0301837	0.0301837	0	0	0	0	0.71222	0.326685	5.01363	0.0956633	60.6449	3.86136
BDNF	0	0	0.578424	0.578424	0	0	0	0	0	0	0.348964	0.348964	5.75941	0.66463	8.20011	0.102604
BDNF-AS	0.11544	0.11544	0	0	0	0	0	0	0	0	2.4612	2.4612	0	0	0	0
BDP1	120.942	64.0894	21.9743	6.67176	41.631	21.3733	4.20169	3.1414	16.6097	5.91634	20.9748	2.48678	0.0701932	0.00396041	0.0277676	0.000642972
BEAN1	0	0	0.567448	0.409891	3.7326	2.25507	0	0	19.0886	17.7884	0	0	0.176555	0.0236452	0.0282102	0.00679462
BECN1	43.2462	18.1251	71.437	20.7638	51.9087	14.146	68.1557	58.4613	46.5034	11.9628	4.24918	0.613762	100.011	1.40695	121.382	1.56298
BEGAIN	0	0	0	0	0	0	0	0	0	0	0	0	0.0288606	0.00664744	0.161136	0.0149004
BEND2	0.0072389	0.00602189	0.00350057	0.00350057	0.011759	0.00821926	0	0	0	0	0	0	0	0	0	0
BEND3	0	0	0.266405	0.21144	5.61798	2.64941	15.6596	15.6596	0.21295	0.21295	0.109956	0.109956	0.52114	0.0040962	0.34482	0.0255049
BEND4	0	0	0	0	0	0	0	0	0	0	0	0	0	0	0.000672449	0.000459152
BEND5	0	0	0	0	0	0	0	0	0	0	0	0	0.0221797	0.0099644	0.0114711	0.00796011
BEND6	0	0	0.00448612	0.00448612	2.9766	2.93265	0	0	0	0	0.699597	0.306721	13.2906	0.33477	5.85618	0.0985092
BEND7	0.498928	0.19369	1.16592	0.810642	5.15098	2.69669	0.0708857	0.0354812	0.831236	0.614317	6.1653	0.12412	0.380911	0.0650745	0.260344	0.0532707
BEST1	0.267736	0.170476	1.44202	0.839157	5.22265	4.63605	0	0	0.125778	0.125778	11.4233	0.757579	0.654281	0.0747934	2.50783	0.223839
BEST2	0	0	0	0	0	0	0	0	0	0	0	0	0.00958203	0.0035081	0.00819443	0.00319014
BEST3	5.06375	5.06375	0	0	0	0	0	0	0	0	0	0	1.09151	0.194927	0.0306704	0.00576961
BEST4	0	0	0	0	1.15577	1.15577	0	0	0	0	0	0	0.0532495	0.0107059	0.0814656	0.00935264
BET1	0.00699757	0.00699757	16.7996	7.65919	15.4823	5.25562	0	0	9.48739	9.00331	6.6651	0.211143	60.4014	0.829632	104.898	7.13586
BET1L	110.7	104.836	17.177	12.2112	20.2429	11.7521	24.2514	24.1587	8.05423	6.21444	23.9116	8.49151	148.703	3.11853	284.523	13.8951
BEX1	0	0	0	0	0	0	0	0	0	0	0	0	6.3353	0.463667	6.30564	0.132267
BEX2	26.3297	19.3029	42.117	11.449	59.1677	26.8221	0	0	0	0	174.805	88.1862	0.501373	0.133772	1.114	0.346384
BEX4	159.519	105.596	63.7816	21.4542	63.8299	17.0519	35.1487	31.7943	67.8045	26.3814	59.0165	15.3254	26.0819	2.4932	65.393	1.67582
BEX5	0	0	0	0	0	0	0	0	0	0	0	0	0	0	0	0
BFAR	1.77426	1.20716	27.9242	7.25945	20.6534	6.75154	45.0157	45.0157	7.29245	5.72081	14.3457	3.36	88.9935	1.52843	77.5879	1.49306
BFSP1	0	0	0	0	1.6363	1.6363	0	0	107.17	107.17	0	0	1.27413	0.0148211	1.02149	0.0310081
BFSP2	0	0	0.1558	0.1558	0	0	0	0	0	0	0	0	0	0	0.00985683	0.00672381
BGLAP	0	0	0.00715489	0.00715489	0	0	0	0	1.53055	1.53055	0	0	0.350682	0.0568182	0.0579216	0.0211387
BGN	39.9195	19.808	10.2623	3.53143	38.0082	14.0929	0	0	535.857	125.209	183.899	20.7634	117.78	11.8739	82.9394	10.5835
BHLHA15	0	0	0	0	0	0	0	0	0	0	0	0	0.223466	0.0844978	2.74621	1.19754
BHLHA9	0	0	0	0	0	0	0	0	0	0	0	0	0	0	0.011805	0.00807612
BHLHB9	0	0	1.4689	0.696329	1.96603	1.51773	0	0	0	0	0.70795	0.157305	2.07551	0.091067	1.7404	0.0437422
BHLHE22	0	0	0	0	0	0	0	0	0	0	0	0	0	0	0.00301716	0.00194002
BHLHE23	0	0	0	0	0	0	0	0	0	0	0	0	0	0	0	0
BHLHE40	146.572	40.2704	78.2711	21.0542	58.724	12.1966	23.6036	21.8341	25.1277	13.6447	30.469	2.7889	21.7635	1.36342	28.2763	5.60252
BHLHE40-AS1	0.971134	0.947399	0.060443	0.0399571	0.390154	0.232966	0	0	0	0	0	0	0	0	0	0
BHLHE41	10.8387	10.221	4.59202	1.59369	3.49761	1.19714	0	0	0.10764	0.10764	11.7442	5.10857	18.2935	0.67109	3.44076	0.158713
BHMT	0	0	0	0	0	0	0	0	9.15987	9.15987	0	0	0.181064	0.0393977	0.14098	0.0337748
BHMT2	0.447231	0.24053	0.0676963	0.0490275	0.174596	0.126045	0	0	0.0153775	0.0153775	0.467444	0.467444	64.3023	3.29906	105.423	8.89508
BICC1	0.0775837	0.0775837	0	0	0	0	0	0	0	0	0.942752	0.170839	17.3012	0.457891	44.5838	2.26719
BICD1	0	0	0	0	0.412459	0.412459	0	0	0	0	35.7444	21.5556	10.5752	0.0890042	10.724	0.692136
BICD2	7.74971	4.66197	13.0058	4.07458	16.1112	8.05587	3.68931	3.68931	1.08381	1.08381	1.99087	1.00465	9.90492	0.564074	6.53782	0.0954079
BID	0	0	1.4782	1.44844	0.0222095	0.0222095	74.6324	70.4267	0	0	3.11516	1.90091	29.0518	0.442207	14.4267	0.21512
BIK	0	0	0	0	7.42856	7.42856	0	0	0	0	0	0	0.0150732	0.0103086	0.0537433	0.0129669
BIN1	0	0	0	0	0	0	23.3647	23.3647	0	0	49.2613	7.26676	10.0925	0.955102	19.6865	0.154039
BIN2	3.25667	2.89198	18.0717	8.283	4.86765	3.45115	117.573	117.434	110.787	71.7625	5.80959	3.43324	0.00193812	0.0013247	0	0
BIN3	1.86262	1.35029	38.7883	15.0138	186.895	70.52	0	0	1.77952	1.77952	3.30669	3.30669	42.4256	1.72683	26.6394	0.638664
BIRC2	73.1076	57.4021	11.9143	4.93214	21.0079	6.14091	0.425771	0.277593	8.43088	3.76248	3.73715	1.15213	221.283	4.69364	88.3784	0.558929
BIRC3	0	0	0	0	0.00759468	0.00759468	0.558558	0.558558	0	0	2.6669	1.09363	6.36806	0.54452	1.64372	0.112582
BIRC5	0	0	48.2788	31.9635	117.112	60.8315	134.213	134.213	0	0	0.232824	0.232824	751.359	14.114	14.2482	1.56103
BIRC6	12.6463	5.28777	6.56655	1.58193	13.2079	4.63407	0.506954	0.318054	3.35538	1.04959	12.0242	2.42944	19.6262	0.297399	18.4677	0.394797
BIRC7	0	0	0	0	0	0	0	0	51.8309	51.8309	0	0	0.0124663	0.005576	0	0
BIRC8	0	0	0	0	0	0	0	0	0	0	0	0	0	0	0	0
BIVM	0.862839	0.805564	4.78527	3.05651	3.18315	1.75971	0.0865221	0.0865221	38.1797	23.6414	1.96985	0.488417	27.9351	1.06621	21.4305	0.191326
BLACE	0	0	0	0	0	0	0	0	0	0	0	0	0	0	0.00539825	0.0036824
BLCAP	32.1795	8.13754	86.4232	23.5822	71.3364	23.639	1.93278	1.93278	8.70327	3.64432	10.4382	0.340477	387.15	22.6533	508.647	12.566
BLID	0.263655	0.263655	0.184906	0.184906	5.15371	4.37127	0	0	0	0	7.76377	7.76377	0.109172	0.0335964	0.0871839	0.0207021
BLK	0	0	0	0	0	0	0	0	0	0	0	0	0.004176	0.00285428	0.0146724	0.0074226
BLM	0	0	1.43417	1.38959	8.32575	4.85674	5.43959	5.43959	0	0	2.87323	0.0224442	6.31824	0.43207	0.102685	0.0113208
BLMH	0.793777	0.773295	46.3183	31.5573	7.25045	3.55782	0.174867	0.174867	0	0	10.4627	10.4627	46.9915	0.539552	28.769	0.374698
BLNK	31.9245	16.4557	24.0415	11.1366	32.8389	12.5973	36.1991	36.1991	0	0	36.2815	18.2032	0	0	0	0
BLOC1S1	7.54202	6.17348	378.62	125.038	240.276	81.6464	609.92	373.961	333.195	215.118	50.3064	20.6646	40.8494	1.28318	38.2118	1.40556
BLOC1S2	1.17378	0.79186	20.7735	7.83391	21.3355	5.34895	40.0027	40.0009	16.0879	15.893	1.14709	1.14709	122.598	3.92283	82.5879	1.86906
BLOC1S3	59.3021	58.7384	37.7996	23.7531	68.1759	38.3767	0.495846	0.495846	118.44	62.7013	0	0	37.9038	2.62171	36.9205	0.465792
BLOC1S4	0.100568	0.100568	3.77753	2.03016	3.05827	1.63791	0	0	6.20674	6.20674	0	0	13.4527	0.386673	16.4302	0.547469
BLOC1S5	0.347898	0.347898	2.77508	2.0984	2.88318	2.27168	0	0	0.0996513	0.0996513	0.00079365	0.00079365	21.2908	0.228335	17.866	0.318443
BLOC1S6	1.80611	0.944785	6.10153	3.05572	7.44442	3.1833	1.0199	0.86944	5.6159	2.97562	1.12166	0.0200118	366.605	4.57118	512.054	14.3496
BLVRA	191.787	146.746	59.63	30.9709	18.4566	9.44775	5.63027	5.63027	19.399	19.399	3.51423	0.269854	34.3951	1.19425	28.7058	3.2143
BLVRB	0	0	172.109	120.013	130.961	82.4772	31.0719	31.0719	145.658	145.658	134.932	44.5826	34.0462	0.942458	33.9086	0.685059
BLZF1	0.0401858	0.0254819	16.96	11.4191	15.8874	8.84097	0.226324	0.226324	18.32	15.1492	8.39871	1.83799	30.9512	0.585102	24.2448	0.727708
BMF	0	0	0	0	0	0	0	0	0	0	5.66601	0.814471	9.09276	1.04944	90.189	11.8264
BMI1	7.90309	4.04387	3.09048	2.22505	1.92806	0.629718	0.319888	0.105099	4.00669	3.57302	13.7857	0.0622477	102.359	3.53426	106.812	4.70739
BMP1	0.415287	0.415287	1.84286	1.82478	1.18639	1.12695	2.62846	2.62846	25.4464	19.7262	176.365	9.48865	22.8949	0.979413	31.0298	1.6856
BMP10	0	0	0	0	0	0	0	0	0	0	0	0	0	0	0.00932908	0.00636995
BMP15	0	0	0	0	0	0	0	0	0	0	0	0	0	0	0	0
BMP2	0	0	0	0	0	0	0	0	0	0	8.72968	0.895868	2.77877	0.31205	63.6769	2.10732
BMP2K	0.0393037	0.0393037	7.41626	6.22291	2.83374	2.27823	79.8383	79.782	4.51368	4.04181	60.4571	17.9973	10.4299	0.550751	6.2804	0.104525
BMP3	2.10174e-08	2.10174e-08	0	0	0	0	0	0	0	0	0	0	0.0126222	0.00291961	0.10035	0.00386
BMP4	0	0	14.6233	13.9338	10.9176	9.33643	0	0	0	0	7.67137	0.839698	2.09249	0.181545	6.3305	0.592466
BMP5	41.1554	41.1554	3.43321	3.43321	0	0	0	0	0	0	3.46189	0.900698	0	0	0	0
BMP6	0.12254	0.12254	1.80911	0.817466	0.890395	0.624139	0.152166	0.152166	0.171178	0.171178	43.1289	0.214382	0.114164	0.027211	1.50526	0.315925
BMP7	73.0459	38.5158	83.6694	24.2696	85.7708	18.5199	1.13868	0.571339	0.602451	0.370077	10.2535	3.97333	0.152563	0.0353039	0.0662585	0.0147208
BMP8A	0	0	3.58915	3.48831	0.713212	0.535292	0	0	3.77523	3.77523	0	0	0.0321295	0.00789402	0.0181444	0.00251029
BMP8B	6.82031	6.4886	0.913535	0.648189	0	0	0.522106	0.522106	0	0	1.0646	1.0646	0.0131996	0.00484344	0.00773268	0.00403708
BMPER	0.00339267	0.00339267	1.00142	1.00142	0	0	0	0	0.187835	0.187835	0.205074	0.205074	17.9992	4.0464	11.8552	0.240067
BMPR1A	0.552298	0.445767	1.57336	0.688317	3.17649	1.75405	0	0	0.0448468	0.0448468	9.53379	1.7028	19.2215	0.16058	15.2935	0.318532
BMPR1B	0	0	0.813569	0.489416	0.00437645	0.00437645	0	0	22.8288	21.5453	0.0556134	0.0556134	2.31424	0.408119	2.02385	0.0219209
BMPR2	0.987674	0.691294	1.87874	0.709799	3.09673	2.51748	0.251942	0.214239	5.27006	1.58136	23.6592	2.75841	8.74561	0.0325506	8.1313	0.29705
BMS1	21.5866	13.1941	2.27396	1.03237	14.076	5.33558	1.97113	1.97113	19.3123	5.45734	4.48594	0.962313	4.58593	0.0737543	3.47018	0.0327905
BMS1P20	31.6629	17.2439	16.603	5.85264	26.6094	5.85231	75.7614	73.0952	48.7776	18.6536	4.03306	1.1043	0	0	0	0
BMS1P4	0	0	6.03014	5.90218	2.3015	1.71028	0	0	0	0	3.1185	3.1185	0	0	0	0
BMX	0	0	0	0	0	0	0	0	0	0	1.01384	1.01384	0	0	0.00231265	0.00157757
BNC1	0	0	0	0	0	0	0	0	0	0	0	0	1.04822	0.0776522	0.254362	0.00468127
BNC2	8.80217	5.38586	5.73421	2.82357	17.7384	7.85317	0.827722	0.827722	0.3884	0.3884	17.3535	6.73841	3.58835	0.0716233	3.09139	0.0989553
BNIP1	33.0228	33.0228	14.9037	13.7474	80.921	36.5503	0	0	0.359991	0.359991	6.55622	6.55622	8.88121	0.325374	7.64405	0.348705
BNIP2	7.99524	5.47533	18.8098	7.84453	11.1774	2.92298	0	0	48.5201	44.3244	17.2377	6.16389	114.302	1.75113	138.534	1.73994
BNIP3	4.82078	2.64713	29.8326	6.67404	14.7098	6.47867	0	0	17.3506	17.3506	2.49427	0.813966	45.7142	0.388394	101.191	7.40306
BNIP3L	12.6456	5.67757	9.39071	3.08159	11.0021	4.27231	46.5219	42.9344	58.8136	39.063	24.6297	0.341284	171.997	0.521389	509.281	16.7035
BNIPL	0.6325	0.447381	1.88811	1.20879	0.121235	0.0841288	0	0	2.59652e-07	2.59652e-07	0	0	0.184759	0.0154995	0.0697979	0.0202945
BOC	0.714228	0.714228	1.09807	0.797733	0.360612	0.187991	0	0	0	0	4.30605	4.30605	9.55433	0.286513	13.6203	0.202959
BOD1	15.8296	11.4667	7.847	3.67798	17.5517	10.9975	0	0	19.9484	19.9484	4.71494	0.19719	112.964	2.58006	100.437	1.42835
BOD1L1	5.53047	2.77979	21.6734	5.49098	11.5672	2.89343	3.60717	3.60717	4.44936	3.42369	26.6835	4.19062	6.12468	0.13289	7.47612	0.114886
BOD1L2	0.0473885	0.0473885	0	0	0	0	0	0	0	0	0	0	0	0	0	0
BOK	0	0	0	0	0	0	0	0	0	0	1.61681	1.61681	56.8701	0.509221	29.2843	0.413852
BOK-AS1	0	0	0	0	0	0	0	0	0	0	0	0	0	0	0	0
BOLA1	0	0	0.305504	0.305504	0.609346	0.609346	0	0	0	0	3.76101	3.76101	0.495735	0.0387621	0.306697	0.0570812
BOLA2	1.73866	1.21261	43.8147	18.9884	18.2805	9.92398	167.921	167.921	19.5754	8.34502	61.8107	31.9071	0	0	0	0
BOLA2B	31.6723	17.3864	145.253	41.3014	170.024	53.1535	472.167	242.77	96.8738	54.398	11.7772	11.7772	3.33802	0.430729	1.9359	0.0793313
BOLA3	364.733	353.099	22.4004	10.0442	22.5034	14.5414	35.8006	35.8006	121.067	79.1569	3.16817	3.16817	100.846	1.40322	65.6677	0.861157
BOLA3-AS1	0.0454443	0.0454443	3.69155e-06	3.69155e-06	0.0138489	0.0138489	0	0	18.6685	18.6685	0	0	0	0	0	0
BOLL	0	0	0	0	0	0	0	0	0	0	0	0	0.0102655	0.00375151	0.00685255	0.00467896
BOP1	0	0	0.823819	0.823819	2.85478	2.24964	0	0	0	0	0	0	0.116097	0.024552	0.0435659	0.00842591
BORA	0	0	1.61843	1.60294	0.362704	0.238688	0	0	0	0	1.64508	1.64508	16.0148	1.01248	3.17288	0.161998
BPESC1	0	0	0	0	0	0	0	0	0	0	0	0	0	0	0	0
BPGM	103.852	48.0242	66.5683	23.5561	62.1156	21.637	16.3332	16.3332	12.8404	9.95554	109.693	0.0233214	41.0003	0.995872	68.5583	2.08049
BPHL	0	0	22.3766	14.8812	3.71522	3.35986	0	0	34.4928	21.7493	7.50267	4.50768	9.76809	0.786391	8.45735	0.120515
BPI	0	0	0	0	0	0	0	0	0	0	0	0	0.0466804	0.0145476	0.499339	0.0494832
BPIFA1	0	0	0	0	0	0	0	0	0	0	0	0	0	0	0	0
BPIFA2	0	0	0	0	0	0	0	0	0	0	0	0	0	0	0	0
BPIFA3	0	0	0	0	0	0	0	0	0	0	0	0	0	0	0	0
BPIFA4P	0	0	0	0	0	0	0	0	0	0	0	0	0	0	0	0
BPIFB1	0.000318763	0.000261543	0.440905	0.440905	0.094274	0.0655583	0	0	0	0	0	0	0	0	0	0
BPIFB2	0	0	0	0	0	0	0	0	0	0	0	0	0	0	0	0
BPIFB3	0	0	0	0	0	0	0	0	0	0	0	0	0	0	0	0
BPIFB4	0	0	0	0	0	0	0	0	0	0	0	0	0	0	0	0
BPIFB6	0	0	0	0	0	0	0	0	0	0	0	0	0	0	0	0
BPIFC	0	0	0	0	0	0	0	0	0	0	0	0	0	0	0	0
BPNT1	0.0111928	0.00996098	2.10533	0.95748	3.82561	2.26101	0	0	1.93817	1.27246	3.49874	3.49874	61.702	0.828087	61.4646	2.73779
BPTF	99.0462	48.9241	29.0563	7.79734	45.1385	12.0954	135.792	135.05	45.4304	39.6081	228.177	71.6291	6.81595	0.107293	6.27931	0.111521
BPY2	0	0	0	0	0	0	0	0	0	0	0	0	0	0	0	0
BPY2B	0	0	0	0	0	0	0	0	0	0	0	0	0	0	0	0
BRAF	66.8901	57.4801	14.4474	8.73313	18.0622	5.38233	0.655156	0.483607	33.5614	20.8942	29.5674	19.2369	3.18356	0.0426725	5.7723	0.0651759
BRAP	2.02635	1.53193	2.28161	0.949484	0.446763	0.255215	0.158896	0.158896	6.38297	6.38297	0.614705	0.415747	8.29554	0.372723	11.3241	0.115698
BRAT1	15.8079	12.206	1.21645	1.17701	9.63912	7.61165	6.50564	6.50564	0	0	3.96487	1.28633	5.97675	0.0995642	3.72361	0.223865
BRCA1	0.104359	0.0961931	38.8074	18.2143	3.78053	1.34783	0.345027	0.185642	0	0	1.18245	0.155271	9.35308	0.531525	0.40661	0.0114576
BRCA2	1.10571	0.571097	14.3569	6.36398	17.8964	6.66612	0.469888	0.469888	33.8951	33.8705	1.789	0.304437	4.0512	0.239375	0.245103	0.0191918
BRCC3	1.34688	0.609203	11.248	3.23092	9.12315	3.23826	6.15112	6.15112	0.435376	0.194204	7.59931	1.63402	22.4106	0.679789	13.8659	0.340197
BRD1	9.46092	5.44346	7.02428	3.37416	1.03447	0.607265	0.0972097	0.0972097	3.16361	3.16361	33.2292	11.7179	4.98734	0.20103	4.76661	0.0476957
BRD2	631.683	247.434	323.432	55.3259	350.347	70.8583	64.5529	58.3019	275.065	124.787	29.9993	6.83863	2.86252	0.0634726	2.15333	0.146099
BRD3	10.9204	7.24415	23.3496	11.2038	42.8237	19.6685	0	0	0	0	0.96927	0.295743	26.9802	0.0521453	32.7028	1.05713
BRD4	178.656	54.8367	99.2483	30.4384	68.2021	14.7966	6.6713	4.78972	832.635	815.496	84.6887	24.2043	7.28103	0.103124	7.27092	0.297632
BRD7	58.2585	25.5306	77.2573	24.4522	63.7728	31.8803	20.8245	8.14161	52.4891	34.3882	0.314618	0.090935	27.1816	0.163511	21.3417	0.134135
BRD8	56.2202	34.0852	36.6072	11.6726	33.0629	11.9315	0.369237	0.278709	1.89645	1.38047	31.633	8.12042	24.078	0.327116	19.9251	0.491694
BRD9	0	0	3.34199	2.86987	0.953106	0.807866	0	0	2.25001	1.54422	8.06813	0.429856	22.2906	0.172407	13.2615	0.120112
BRDT	8.93305	8.91744	0	0	1.97429	1.97429	0	0	0.292338	0.292338	0.0624732	0.0624732	0.00425041	0.00290203	0	0
BRE	0.503906	0.503906	44.2333	20.8224	81.2821	28.7803	0	0	88.2375	78.1783	3.98076	2.59743	8.02802	0.0742314	24.9833	0.759391
BRF1	0	0	1.67578	0.960701	0.59724	0.59724	0	0	0	0	1.39254	1.39254	10.209	0.270107	7.80214	0.0242184
BRF2	0.506336	0.391401	2.89261	2.64104	12.1264	9.65857	0	0	0	0	1.11392	1.11392	14.447	0.984218	21.6926	0.750876
BRI3	66.9187	40.0222	96.8366	29.6587	142.164	41.7995	117.979	74.3798	321.616	107.132	386.615	261.851	519.53	11.9114	383.334	6.74182
BRI3BP	0	0	16.0982	14.8413	0.32992	0.32992	0	0	5.25857	4.36262	0	0	16.3897	0.912233	5.19601	0.316852
BRICD5	3.42131	2.77591	12.0145	10.795	103.684	100.512	0	0	0	0	0	0	10.2215	1.21137	2.86733	0.120871
BRINP1	0	0	0	0	0	0	0	0	0	0	0	0	0.0170836	0.00620189	0.177519	0.0462841
BRINP2	0	0	0	0	0	0	0	0	0	0	0	0	0	0	0.00372622	0.00176845
BRINP3	0	0	0	0	0	0	0	0	0	0	0	0	0	0	0	0
BRIP1	11.2637	6.26666	1.63444	0.53262	2.55649	0.747136	10.5641	2.66092	1.43783	0.334273	0.29446	0.013038	36.8233	0.191636	1.25934	0.0984886
BRIX1	12.9935	5.17039	129.013	58.2687	55.7042	16.8856	2.18797	1.5677	9.30011	8.78365	10.5828	0.521531	27.0458	0.422636	37.4205	3.99564
BRK1	50.4728	41.2762	139.554	37.6382	100.093	16.1025	503.228	253.014	198.799	94.2343	33.7747	2.63938	542.288	7.19125	508.397	7.38545
BRMS1	311.666	302.628	410.114	156.643	223.972	96.1803	0	0	31.8448	19.8494	8.00462	8.00462	51.2343	0.933807	29.799	0.336704
BRMS1L	25.4607	21.7825	5.98144	2.67389	3.10654	1.78038	0	0	0.868969	0.598674	2.02294	0.129196	18.3047	0.506071	13.014	0.109646
BROX	14.6202	5.79521	57.0064	17.2934	31.0966	5.7049	2.9751	1.91206	23.7081	11.6521	9.62947	0.799879	111.814	1.83333	87.9002	3.21355
BRPF1	0.394961	0.394961	5.27954	3.35665	0.396537	0.296767	0	0	7.42615	7.04529	1.41951	0.0780983	2.17469	0.0944131	1.45087	0.0268928
BRPF3	0.731448	0.416805	4.54199	2.95378	6.67986	2.94512	0.718772	0.718772	2.28127	1.50027	20.8514	7.45266	5.37055	0.0255347	5.71563	0.191933
BRS3	0	0	0	0	0	0	0	0	0	0	0	0	0	0	0	0
BRSK1	0	0	0.0212504	0.0212504	0	0	0	0	0	0	0	0	4.12395	0.11026	17.725	0.312945
BRSK2	0	0	0	0	0	0	0	0	0	0	0	0	0.0798701	0.00928963	0.191966	0.0222684
BRWD1	298.562	244.241	58.368	23.0838	31.5748	8.95679	13.0829	11.597	57.6151	35.039	64.2718	26.2998	4.66005	0.0720517	6.5341	0.0590399
BRWD1-AS1	0	0	0	0	0	0	0	0	0	0	0	0	0	0	0	0
BRWD3	0.0313791	0.0192993	0.565894	0.432325	0.335173	0.181728	0.0662927	0.0662927	1.74322	1.48649	4.86497	1.44942	3.77084	0.116666	5.9521	0.184856
BSCL2	3.7292	3.11307	105.881	33.7419	228.934	101.599	254.71	254.71	417.272	239.962	2.13289	2.13289	3.07018	0.145181	7.78757	0.709812
BSDC1	34.0153	16.1467	48.2557	20.4848	16.5733	5.83302	0	0	82.2441	80.2494	0.754312	0.625085	53.9639	1.44925	90.3736	0.677839
BSG	329.442	114.668	818.007	128.427	1161.37	201.016	87.6367	79.4553	464.499	142.596	665.591	39.7297	664.841	10.1657	915.212	37.501
BSN	0.257968	0.256326	0	0	0	0	0	0	0	0	0	0	0.00747246	0.000593254	0.00416311	0.000669859
BSN-AS2	0.00898892	0.00896817	0.00211201	0.00162733	0	0	0	0	0	0	0	0	0	0	0	0
BSND	0	0	0	0	0	0	0	0	0	0	0	0	0.00220878	0.00150969	0	0
BSPH1	0	0	0	0	0	0	0	0	0	0	0	0	0	0	0	0
BSPRY	40.6096	36.1686	6.57823	5.3338	35.5862	21.3491	0	0	0	0	0	0	0	0	0	0
BST1	0	0	1.0246	0.85779	0.835656	0.835656	1.31499	1.31499	0	0	0.589201	0.589201	17.6199	1.33044	23.563	1.44655
BST2	16.9167	16.9167	0	0	0	0	245.955	124.937	483.933	224.759	30.7135	14.5114	55.5535	21.6646	57.1162	16.9469
BSX	0	0	0	0	0	0	0	0	0	0	0	0	0	0	0	0
BTAF1	1.32564	0.951826	13.8615	6.9526	9.47979	3.44683	193.595	193.595	3.09348	1.70498	17.1719	1.51127	5.43459	0.120274	6.45081	0.114137
BTBD1	0.0320422	0.0256889	3.17561	1.92204	0.604209	0.45805	0	0	1.2111	0.762774	1.25769	0.0324463	107.696	0.619147	117.321	0.68314
BTBD10	4.9906	2.60056	19.1892	12.5043	10.1538	5.39878	0	0	61.7161	28.0364	8.15592	5.07026	42.4038	1.4256	20.6942	0.176125
BTBD11	0.0473466	0.0473466	4.80378	3.28607	2.08314	1.93413	0	0	0	0	0	0	0.233231	0.0565042	0.0469645	0.0100224
BTBD16	0	0	0.0845219	0.0845219	0	0	0	0	0	0	8.50933	1.73953	0.00372832	0.0025498	0.0194398	0.0104672
BTBD17	0	0	0	0	0	0	0	0	0	0	0	0	0	0	0	0
BTBD18	0	0	0	0	0.0837644	0.0837644	0	0	0	0	0	0	0	0	0	0
BTBD19	0	0	0	0	0	0	0	0	0	0	9.14098	9.14098	15.3121	0.769649	24.993	0.97553
BTBD2	4.02543	3.01303	9.3585	5.16906	1.46374	1.46374	6.32404	6.32404	1.41406	1.41406	5.73885	5.73885	49.2915	1.48633	52.6299	1.62225
BTBD3	2.35849	1.10043	12.9388	5.75631	10.7802	3.4247	0	0	0	0	27.5895	1.04935	127.988	4.48384	544.654	34.4865
BTBD6	3.41238	3.41238	8.64883	5.66986	21.2829	14.2162	0	0	67.8216	31.8445	3.02387	3.02387	28.2659	0.30612	10.6818	0.222706
BTBD7	34.308	20.9594	6.72979	3.57923	17.3304	3.8504	26.6809	26.57	5.99117	5.21362	9.77521	1.85856	9.70911	0.227017	11.1878	0.629649
BTBD8	0	0	1.98784	1.98784	0	0	0	0	0	0	5.05993	1.7599	0.344071	0.0133983	0.522121	0.0525285
BTBD9	1.24572	0.885148	2.6895	1.36095	3.89195	1.50529	0	0	0.693117	0.433766	4.26915	1.21511	6.0218	0.138504	7.55294	0.234085
BTC	0.596916	0.596916	0	0	0	0	0	0	0	0	0	0	0.0164165	0.00737523	0	0
BTD	0	0	41.6285	18.202	36.2656	15.7095	0	0	72.5182	72.5182	7.45433	7.45433	22.3425	0.364732	32.9812	1.22597
BTF3	271.008	136.74	702.009	186.042	294.305	52.904	270.793	182.095	332.369	149.473	79.2648	7.17463	432.221	2.72461	401.502	6.71606
BTF3L4	3.48031	2.55251	13.7985	3.96422	9.76924	2.62986	0.191382	0.191382	8.97433	3.62121	15.2659	2.37941	196.435	2.46093	156.729	1.45427
BTF3P11	0	0	0	0	0	0	0	0	0	0	0	0	0	0	0	0
BTG1	75.9684	31.378	35.4604	6.12346	25.3916	5.40162	107.387	51.6548	34.5179	19.7399	6.81744	1.45857	84.9544	3.75932	169.099	3.58518
BTG2	25.8509	12.4712	109.472	29.3543	128.872	18.7092	12.4612	11.2665	30.5529	23.2355	23.3684	0.341518	4.98996	0.276311	14.7681	1.18298
BTG3	183.475	111.926	122.522	30.0749	89.7991	25.223	182.717	182.717	3.60802	3.60802	29.3088	0.512986	169.82	10.3247	103.321	4.61585
BTG4	0	0	0	0	0	0	0	0	0	0	0	0	0.0551253	0.0161136	0.0104654	0.00713898
BTK	0.211005	0.211005	0.491831	0.491831	2.39991	1.76373	0	0	0	0	2.01428	2.01428	0.0181883	0.00876299	0.0308119	0.00764737
BTLA	0.0062928	0.0062928	0	0	0	0	0	0	0	0	0.271458	0.164984	0.0147484	0.0100638	0.0703452	0.00865539
BTN1A1	0	0	0	0	0	0	0	0	0	0	0	0	0	0	0.00164712	0.00112684
BTN2A1	13.5131	11.4032	28.4288	21.1158	21.8005	13.8334	0.958878	0.958878	0.92863	0.92863	3.65675	0.637643	25.2757	0.675272	34.2417	0.167476
BTN2A2	7.93933	7.93933	7.93899	5.42424	1.46171	1.36169	0	0	0	0	1.7535	0.588118	11.7427	1.07593	16.6485	0.13189
BTN2A3P	0.102821	0.102821	0	0	0.43955	0.356555	0	0	0	0	2.26371	2.26371	0	0	0	0
BTN3A1	11.1789	11.0698	14.7461	7.67236	21.3539	12.642	0	0	0.560313	0.560313	2.20458	2.01597	12.0483	0.409242	37.0221	1.79592
BTN3A2	1.93184	1.00532	18.2279	6.92284	1.2668	0.814727	60.571	57.3137	0.13018	0.130167	1.09023	0.895972	73.7971	4.37124	134.795	3.98384
BTN3A3	4.10498e-06	2.83917e-06	17.195	12.2896	4.26735	2.4268	0	0	0	0	19.9003	15.12	12.5983	1.01054	38.943	0.657624
BTNL10	0	0	0	0	0	0	0	0	0	0	0	0	0	0	0	0
BTNL2	0	0	0	0	0	0	0	0	0	0	0	0	0	0	0	0
BTNL3	0	0	0	0	0	0	0	0	0	0	0	0	0	0	0	0
BTNL8	0	0	0	0	0	0	0	0	0	0	0	0	0	0	0	0
BTNL9	0	0	0	0	0	0	0	0	0	0	0.556144	0.556144	0.0102309	0.00457612	0.0225125	0.0098266
BTRC	12.481	8.29355	36.7761	29.1389	1.19438	0.509832	1.94444	1.94444	10.9821	6.96103	6.01453	3.22868	29.1733	0.395663	30.7766	0.688065
BUB1	0	0	10.6366	6.48788	0.569948	0.569948	0	0	0	0	1.03608	0.280955	55.4293	0.27995	1.33486	0.0567728
BUB1B	0	0	8.33518	7.88393	3.99648	3.12769	0	0	0	0	0.702518	0.188829	63.9556	0.369844	1.15361	0.14342
BUB3	15.2524	15.0114	22.5862	8.56969	30.3429	10.0504	11.2033	11.2033	39.4972	15.9257	4.13457	1.77849	228.271	7.6756	70.029	1.10388
BUD13	0.201161	0.201161	5.33841	2.48872	22.6154	14.746	0	0	0	0	3.99638	2.49615	7.44238	0.236665	2.68745	0.0256174
BUD31	187.629	148.229	197.961	55.0935	318.438	58.0857	91.8929	47.2356	192.647	86.1075	12.5575	9.51847	222.364	5.79983	180.482	5.3041
BVES	7.50712e-05	6.83428e-05	0.104745	0.101677	0.157636	0.0594755	0	0	0	0	0.928999	0.928999	35.3694	0.55732	17.2756	1.35695
BVES-AS1	0	0	0	0	0	0	0	0	0	0	0	0	0	0	0	0
BYSL	0	0	18.8471	13.5892	21.9132	14.3537	145.375	145.375	1.57182	1.57182	0.775628	0.775628	21.8675	0.401638	15.1842	0.174893
BZRAP1	0	0	0	0	0	0	0	0	0	0	0	0	1.157	0.225405	1.34887	0.222549
BZRAP1-AS1	0	0	0	0	0.803593	0.803593	4.78313	4.78313	0	0	0.426428	0.426428	0	0	0	0
BZW1	21.1904	10.5927	99.8977	35.6929	97.4443	26.6205	50.0951	30.0765	239.627	164.513	8.83961	1.12691	533.097	18.8411	407.993	11.5236
BZW2	395.258	167.323	293.239	76.6261	249.517	60.5597	8.13127	3.5175	541.955	136.824	171.186	14.5953	36.0918	0.250308	23.1991	0.537422
C10orf10	12.239	6.95661	81.5568	41.288	45.2419	20.2711	0	0	217.035	216.534	3.50885	1.41016	6.47723	0.368235	1481.27	108.456
C10orf105	0	0	0	0	0	0	0	0	0	0	0	0	0.00376585	0.00257119	4.18738	0.816807
C10orf107	0	0	0	0	0	0	0	0	0	0	0	0	0.736933	0.1633	6.19806	1.40525
C10orf11	0	0	0	0	0	0	0	0	0	0	7.13085	7.13085	1.26175	0.322287	1.63645	0.135032
C10orf111	0	0	1.00699	1.00699	2.97806	2.58312	0	0	0	0	0	0	0	0	0	0
C10orf113	0	0	0.950208	0.950208	2.39861	2.39861	0	0	0	0	0	0	0	0	0	0
C10orf12	0.409439	0.221448	10.5645	9.1234	14.9624	11.1868	0	0	1.57926	1.00707	13.6843	13.1553	0.846377	0.0133029	0.531547	0.0227943
C10orf120	0	0	0	0	0	0	0	0	0	0	0	0	0	0	0	0
C10orf126	0	0	0	0	0	0	0	0	0	0	0	0	0	0	0	0
C10orf128	0	0	0	0	0	0	0	0	0	0	3.44917	2.56148	0.0914913	0.0230652	0	0
C10orf131	0	0	0	0	0.280236	0.162753	0	0	0	0	3.48858	3.48858	0.180416	0.0043243	0.0815888	0.0152289
C10orf2	0	0	4.90158	4.88387	3.80211	3.80211	0	0	0	0	0.738603	0.738603	7.43488	0.431126	5.95833	0.225473
C10orf25	0.0244984	0.0244984	4.0132	4.0132	0	0	49.7833	49.7833	0	0	2.23106	2.23106	0	0	0	0
C10orf32	11.3931	5.78775	53.1222	17.0381	18.2874	6.28394	0.0892047	0.086626	29.8262	15.3946	4.53982	3.35673	91.3258	15.1789	95.4061	7.05025
C10orf35	0	0	1.28826	1.28826	39.9217	30.277	0	0	0	0	0	0	1.303	0.491704	1.05293	0.307537
C10orf53	0	0	0	0	0	0	0	0	0	0	0	0	0	0	0	0
C10orf54	74.9822	54.4813	132.021	32.7972	163.157	47.328	225.677	225.677	4.8907	4.8907	2.02462	0.214577	5.83972	0.396451	97.7757	6.66297
C10orf55	0	0	0	0	0.0791641	0.0791641	0	0	0	0	0	0	0.545852	0.0574633	0.0503449	0.0091169
C10orf62	0	0	0	0	0	0	0	0	0	0	0	0	0	0	0	0
C10orf67	0	0	0.0237669	0.0237669	0	0	0	0	87.8804	87.8804	0	0	0.164947	0.0194418	0.0327579	0.0161015
C10orf71	0	0	0	0	0	0	0	0	0	0	0	0	0	0	0	0
C10orf71-AS1	0	0	0	0	0	0	0	0	0	0	0	0	0	0	0	0
C10orf76	1.54527	1.2759	16.6545	10.0302	8.48521	4.83976	0.206455	0.206455	11.6064	11.6064	6.57648	2.43135	26.6518	1.24952	27.6782	0.19347
C10orf82	0.121757	0.0965653	16.0214	11.0231	0.362158	0.122845	0	0	0.351156	0.351156	0	0	0.0251161	0.0058301	0.0105925	0.00723261
C10orf88	0	0	0.149488	0.105521	0	0	0	0	0	0	4.50959	4.18393	8.04126	0.287595	7.88317	0.0931864
C10orf90	0	0	0	0	0	0	0	0	0	0	0	0	0.0818915	0.0154186	0.146997	0.0157487
C10orf91	0	0	0	0	0	0	0	0	0	0	0	0	0	0	0	0
C10orf95	7.76597	7.76597	24.1589	11.5778	66.1625	25.4339	0	0	0	0	0	0	0	0	0	0
C10orf99	0	0	0	0	0	0	0	0	0	0	0	0	0	0	0	0
C11orf1	0	0	4.49061	2.66535	14.9204	5.81355	0	0	0	0	3.77938	1.23036	0.411467	0.0190287	0.417436	0.0365192
C11orf16	0	0	0	0	0	0	0	0	0	0	0	0	0	0	0	0
C11orf21	0	0	0	0	0	0	0	0	0	0	0	0	0.00910521	0.00622706	0.00989349	0.0067684
C11orf24	0.312957	0.259103	11.2237	5.65675	3.28749	1.69888	1.5816	1.40639	21.8718	16.1261	8.12614	1.87723	126.474	3.80997	105.141	2.59435
C11orf30	8.09082	6.12756	44.0498	29.7588	11.8912	5.31198	0.0724511	0.0724511	9.67158	9.58889	659.945	56.6153	4.01406	0.133875	4.0609	0.0354954
C11orf31	71.7718	42.1764	116.444	23.7702	62.0499	11.798	6.05696	5.61806	26.0521	13.4213	28.1347	23.5431	101.77	4.75241	44.8352	1.88999
C11orf40	0	0	0	0	0	0	0	0	0	0	0	0	0.0172664	0.0118015	0	0
C11orf42	0	0	0	0	0	0	0	0	0	0	0	0	0.00718768	0.00490464	0	0
C11orf44	0	0	0	0	0	0	0	0	0	0	0	0	0	0	0	0
C11orf45	0.0191998	0.0191998	0.0507739	0.0507739	2.37174	2.19187	0	0	0	0	0.345537	0.345537	1.76493	0.193651	1.28919	0.16126
C11orf49	0	0	11.4523	5.63418	26.6348	13.4275	0.19156	0.19156	1.45105	1.45105	0	0	27.0218	1.2706	40.2948	0.369449
C11orf52	6.75667	6.75667	67.6132	30.9071	105.902	37.2816	0	0	133.046	58.0313	0	0	0	0	0	0
C11orf53	0	0	0	0	0	0	0	0	0	0	0	0	0	0	0.313558	0.0560144
C11orf54	4.81279	2.2437	8.78516	2.38686	24.1822	9.01342	0	0	26.4556	19.4531	3.45342	2.12377	8.66275	0.130876	13.51	0.238801
C11orf57	2.00846	1.73836	4.06794	2.42067	5.41592	2.01302	0.454002	0.454002	9.33038	5.49302	0.523992	0.0273018	17.7537	0.273723	18.1764	0.332777
C11orf58	84.3737	56.6348	31.1104	4.77151	44.4985	7.47491	69.9776	59.6625	34.3926	12.7305	8.00634	1.71796	433.15	1.82622	449.153	7.79559
C11orf63	0.0733718	0.0733718	1.34212	0.834872	0.324898	0.282549	0	0	0	0	4.71363	0.487562	2.1829	0.0288962	1.28028	0.0634601
C11orf65	0	0	0.0273117	0.0273117	0.307435	0.307435	0	0	0	0	0.383065	0.0129184	0.145109	0.00384473	0.331959	0.0294944
C11orf68	15.2343	14.3411	62.2634	41.0169	17.7722	9.57423	0	0	44.0037	44.0037	0	0	60.4017	2.06879	28.3259	0.199855
C11orf70	0.0453048	0.0312711	0.0124663	0.0124593	1.47968	1.37233	0	0	0	0	2.10244	1.71125	2.57803	0.0540421	4.6508	0.203276
C11orf71	3.26296	1.2216	1.98467	1.27538	1.33356	0.684184	0.904871	0.320895	0	0	4.93795	0.799885	2.63017	0.182439	3.32207	0.263024
C11orf72	12.0166	4.43842	11.4892	4.14933	12.3984	3.28304	1.76897	0.578853	4.18883	3.86111	1.36994	0.345372	0	0	0	0
C11orf73	35.8926	26.629	95.7928	26.5209	125.502	25.9923	0	0	109.467	60.9177	3.2347	0.900403	37.8838	0.793824	37.3003	1.06961
C11orf74	4.328	4.07904	18.9194	10.7385	16.0401	11.2061	0	0	0	0	0.146065	0.146065	18.6033	0.0677018	25.0462	0.106591
C11orf80	0.125846	0.125846	0.0376614	0.0376614	1.63678	1.10765	0	0	0	0	1.99897	1.99897	4.6204	0.267657	2.2748	0.206084
C11orf84	8.98556	7.0752	7.60681	3.90825	1.32625	1.05152	0	0	0	0	0	0	57.1349	1.29202	44.6375	1.94385
C11orf85	0	0	0	0	0	0	0	0	0	0	0	0	0	0	0	0
C11orf86	0	0	0	0	0	0	0	0	0	0	0	0	0	0	0.595639	0.0597984
C11orf87	0	0	0	0	0	0	0	0	0	0	0	0	0.102433	0.0368306	0.393098	0.130483
C11orf88	0.00577475	0.00577475	0.00876095	0.00876007	0.00980485	0.00979464	0	0	0	0	0	0	0.0345797	0.0126809	0.0372315	0.0138879
C11orf91	0	0	0	0	1.55225	1.55225	0	0	0	0	0	0	0.387678	0.0287136	0.118158	0.0139693
C11orf94	0	0	0	0	0	0	0	0	0	0	0	0	0.853944	0.230018	1.2008	0.26697
C11orf95	8.97682	7.07618	34.2919	12.0839	15.0339	7.53877	0	0	0	0	6.37836	6.37836	68.2265	4.54524	84.4806	2.85668
C11orf96	2.5653	2.5653	7.80598	7.80598	0	0	0	0	0	0	24.1927	24.1927	4.46332	0.0828205	79.0362	8.66227
C11orf97	0	0	0	0	0	0	0	0	0	0	0	0	0	0	0	0
C12orf10	0.451295	0.451295	28.8343	14.9485	56.3254	31.5722	0	0	135.02	135.02	18.0973	7.99638	29.1716	0.177342	27.9592	0.187491
C12orf29	1.34003	0.964077	5.49765	3.42321	3.85958	3.08858	0.119038	0.119038	0.418739	0.261935	1.82488	0.38572	30.7588	1.08202	22.657	0.885919
C12orf4	74.6561	73.651	3.00909	1.61057	0.9046	0.684957	0	0	18.7951	18.7951	4.48937	0.480695	42.1846	0.277219	27.8378	0.394801
C12orf40	0	0	0.255847	0.255847	0	0	0	0	0	0	0	0	0	0	0	0
C12orf42	0.0634272	0.0634272	0	0	0	0	0	0	0	0	0	0	0	0	0	0
C12orf43	2.2239	1.36041	24.5762	12.9977	26.8088	12.7405	0.241526	0.241526	0	0	1.14869	1.14869	26.0668	0.355368	14.7603	0.490019
C12orf45	0	0	22.0096	14.3324	20.3938	7.76053	117.137	102.812	71.0661	59.3159	2.95487	0.156488	19.0848	0.553233	9.29712	0.829303
C12orf49	0.0644337	0.0644337	0.0398999	0.027805	0.152056	0.123937	3.37963	3.37963	0.673292	0.673292	0.50064	0.50064	97.1307	2.27025	91.6738	1.56846
C12orf5	3.02277	2.46846	2.46188	1.12543	3.74867	1.27353	16.4913	16.4913	1.93437	1.86436	0.332272	0.332272	0	0	0	0
C12orf50	31.8353	19.2083	12.1824	3.79378	13.5542	2.91935	3.15154	0.846413	46.4287	32.2595	56.7006	8.65696	0.474321	0.0214101	0.504303	0.0479889
C12orf54	0	0	0	0	0	0	0	0	0	0	0	0	0	0	0.0549188	0.0372979
C12orf56	0	0	4.28684	4.20367	7.53626	5.9156	0	0	15.888	15.888	0.373667	0.373667	0.613445	0.113278	0.0257737	0.00944463
C12orf57	88.6309	85.2454	590.594	193.52	777.497	253.723	0	0	1561.73	962.885	62.5062	62.5062	173.107	3.23315	278.524	10.3823
C12orf60	0	0	0	0	0.121829	0.121829	0	0	0	0	0	0	1.3865	0.067277	0.844262	0.118705
C12orf65	6.44278	5.35223	25.5109	13.3442	15.4321	4.80598	8.59684e-06	8.59684e-06	57.3703	39.2026	4.11371	2.72936	22.6539	0.293002	15.2754	0.932563
C12orf66	0	0	6.26969	6.26969	0.0291507	0.0291507	0	0	0	0	0	0	1.43226	0.046462	1.66844	0.0820874
C12orf71	33.5185	32.6895	0	0	1.15475	0.92254	0	0	0	0	0	0	0.00925506	0.00631903	0	0
C12orf73	50.9866	42.8088	24.3171	21.0847	41.0338	17.9831	0	0	0	0	0	0	42.6875	2.69183	59.4092	0.989077
C12orf74	0	0	0	0	0	0	0	0	0	0	0	0	0	0	0	0
C12orf75	0	0	0.286131	0.23177	0.71252	0.71252	0	0	185.523	107.59	3.62074	0.707397	2965.52	120.183	673.121	10.5996
C12orf76	6.65372	4.36426	6.4564	5.57265	4.4076	3.02075	0	0	0	0	2.21729	1.6754	15.3211	0.357373	40.1104	1.68149
C12orf77	0	0	0	0	0	0	0	0	0	0	0	0	0	0	0	0
C12orf79	0	0	0	0	0	0	0	0	30.7601	30.7601	0.129746	0.129746	0.532289	0.0656461	2.69296	0.289747
C12orf80	0	0	0	0	0	0	0	0	0	0	0	0	0	0	0	0
C14orf1	51.3327	35.5584	112.922	22.7071	126.645	33.2649	0	0	113.616	67.0036	80.3112	25.5545	29.0592	1.32335	39.8431	1.29648
[truncated: 20,634 more rows]

## Sheet: S2
Table S2: Genes expressed in tissue-level placental transcriptome, but missing (or present in single cells only) in the single-cel transcriptome
Gene	expression in PL [TPM]	# cells
KISS1	9167.26	0
CYP1A1	174.375	0
EGFL7	68.59	0
PTGDS	56.815	0
COX4I2	49.2	0
TBX2	44.02	0
C1orf63	38.915	0
PSCA	36.855	0
NDUFA4L2	34.765	0
H3F3A	31.48	0
NPDC1	31.47	0
NR2F1	28.37	0
CYP1B1	27.28	0
GH1	25.475	0
TIE1	25.08	0
SOX18	24.57	0
SLC7A4	24.16	0
C12orf23	20.83	0
PPP1R14C	18.46	0
GNGT1	17.885	0
EHD2	20.48	1
AEBP1	19.465	1
FLT4	40.95	1
MMRN2	28.3	1
ADCY3	18.39	1
CLEC3B	112.67	1
SYNGR3	23.31	1
SF3A2	27.765	1
CCDC85B	21.65	1
RAMP2	53.21	1
TSPAN15	18.3	1
GPR124	27.82	2
F13A1	88.34	2
PLA2G2A	42.825	2
EGFL6	55.34	2
GATM	21.795	2
ACTA2	76.74	2
NNAT	41.58	2
AGTR1	34.07	2
MYL9	18.525	2
KDR	23.585	2
ENPP2	26.73	2
MFAP4	18.305	2
COL6A3	22.505	2
PFDN6	22.72	2
ALDH3B2	18.685	2
LPCAT1	17.365	2
GRK5	17.965	2
SMAD6	20.595	2
APOE	62.145	2
VWF	19.535	2
PPP1R14A	23.265	2
CITED4	28.04	2
C16orf74	20.895	2

## Sheet: S3
Table S3: Genes detected in single cell analyses (including syncytiotrophoblast) that were not detected in tissue level placental transcriptome.
Only top 1000 genes are shown here, ranked according to the number of cell transcriptomes in which they were expressed at the level greater than 2 TPM.
ID	# cells expressed (>2tpm)
AASS	48
ABCC9	73
ABHD16A	35
ABHD17B	28
ABRACL	45
ACACA	38
ACAD11	35
ACADSB	32
ACKR2	76
ACVR2A	37
ADIRF	58
ADRB1	58
AF379626	27
AGAP9	36
AHCYL2	39
AHI1	63
AK6	54
AKAP17A	36
AKAP9	85
ALG13	35
ALYREF	51
ANAPC15	36
ANAPC16	60
ANKHD1	64
ANKRD19P	29
ANKRD28	44
ANKRD36	27
ANKRD37	34
ANKRD44	33
ANXA8	70
ANXA8L1	50
ANXA8L2	60
AP5S1	32
APMAP	64
APOL6	28
APOPT1	40
ARHGAP32	37
ARHGEF5	27
ARID4A	42
ARIH2OS	41
ARL16	33
ARL17B	28
ARL2	55
ARL3	29
ASB3	35
ASTN2	47
ATAD2	29
ATF7	33
ATF7IP2	30
ATG7	35
ATP5E	73
ATP5I	74
ATP5J2-PTCD1	29
ATP6V1F	56
ATP7B	30
ATRAID	57
ATXN7L3B	56
AVPI1	34
BABAM1	41
BAG6	38
BARD1	27
BBIP1	86
BCAT1	47
BCDIN3D	33
BCL2L11	32
BCL2L2-PABPN1	71
BLNK	31
BLOC1S6	27
BMS1P20	50
BOD1L1	54
BOLA2	40
BOLA2B	46
BRAF	40
BRIP1	51
BRK1	62
BROX	61
BSCL2	36
BX537811	64
BX648826	58
C10orf10	35
C11orf72	41
C12orf50	77
C12orf55	76
C12orf73	30
C14orf142	31
C14orf23	32
C15orf48	54
C18orf32	33
C19orf35	42
C1orf21	27
C1orf229	44
C1orf56	79
C20orf24	27
C3orf70	31
C5orf42	30
C6orf48	52
C7orf55-LUC7L2	29
C7orf73	64
C8orf76	28
CACUL1	67
CAMSAP2	48
CAMTA1	38
CASP8AP2	30
CBWD1	78
CBWD2	44
CBWD3	58
CBWD5	86
CBWD6	31
CCDC122	57
CCDC125	54
CCDC152	59
CCDC167	34
CCDC174	37
CCDC34	28
CCDC36	49
CCDC53	35
CCDC73	27
CCSAP	33
CCSER2	27
CCZ1B	27
CD24	80
CD3EAP	29
CDHR4	41
CDK11A	58
CDK11B	42
CDK5RAP2	28
CDKL5	34
CDKN1C	86
CEBPZ-AS1	59
CELF1	52
CENPBD1P1	51
CENPC	42
CEP152	54
CEP63	30
CEP95	33
CERS2	47
CERS5	32
CHCHD7	35
CHML	43
CHMP1B	74
CHMP3	48
CHP1	70
CHRM3	47
CHTOP	34
CIPC	32
CISD2	27
CKAP2	44
CKMT1A	32
CKMT1B	51
CLEC7A	29
CLN3	60
CMAHP	38
CMC2	47
CMSS1	33
CMTR1	35
CMYA5	44
CNEP1R1	38
CNIH1	38
CNOT11	45
CNOT4	46
CNPPD1	30
CNTD1	39
COA1	42
COA3	47
COA4	46
COA6	36
COCH	31
COL4A2	60
COLGALT1	28
COMMD3-BMI1	36
COPG1	43
COX14	60
COX15	43
COX20	63
COX7A2	69
CPD	56
CPQ	27
CREBRF	39
CRIM1	85
CRX	52
CRYBB2P1	31
CSF2RA	71
CSNK2A1	55
CSNK2B	62
CTDNEP1	35
CTSL	88
CTSV	64
CXorf40A	35
CYP51A1	50
CYSTM1	67
D28414	78
DACT3	32
DANCR	46
DAND5	34
DAP	50
DBT	27
DCAF8	52
DCLRE1C	39
DCUN1D3	51
DDX19B	44
DDX39B	44
DDX3Y	71
DESI2	29
DHX8	37
DIABLO	39
DIMT1	34
DL491012	61
DL492225	49
DMD	45
DMXL1	32
DNAH14	36
DPH3	38
DUSP10	41
E02193	53
E10222	43
EAF2	32
ECHS1	73
ECI2	61
EFCAB14	54
EFNA5	42
EID1	70
EIF1AX	72
EIF2AK2	47
EIF3C	74
EIF3CL	60
EIF5A	75
ELK4	28
ELMSAN1	60
ELP5	39
Em:AC005003.4	33
EMC1	43
EMC2	35
EMC3	36
EMC4	54
EMC6	33
EMC7	52
ENAH	46
ENOPH1	32
EPB41L4A-AS1	29
EPG5	32
EPM2AIP1	31
EPPK1	39
EPT1	35
ERC1	64
ERCC5	32
ERVMER34-1	34
ERVW-1	80
EVA1A	36
EXOC4	42
EXOSC6	68
EZH2	34
F5	81
FAM111A	35
FAM117B	29
FAM127A	50
FAM127B	29
FAM133B	46
FAM13A-AS1	58
FAM156A	60
FAM156B	28
FAM166A	42
FAM172A	33
FAM204A	42
FAM208A	29
FAM208B	32
FAM210B	36
FAM21C	28
FAM46C	28
FAM76A	52
FAM83B	37
FANCD2	42
FASTKD2	37
FBXL18	44
FBXL20	38
FBXW7	43
FDPSP2	29
FECH	44
FER	27
FGD5-AS1	51
FGFR2	43
FKSG64	75
FLCN	53
FLJ30403	38
FLJ31306	52
FMN1	28
FNIP1	56
FOPNL	48
FOXO3	39
FRAS1	38
FRG1B	32
FRMD6-AS1	45
FTX	38
FW340055	47
FYB	62
GALM	31
GALNT18	32
GAREM	41
GAS5	70
GATM-AS1	66
GBP4	39
GCC2	67
GCNT2	39
GCSH	46
GDAP2	33
GEMIN8	44
GET4	34
GID8	54
GINM1	38
GLCCI1	30
GNG10	52
GOLGA8B	43
GPATCH4	36
GPR143	27
GPR89A	37
GPR89C	30
GPX3	81
GRAMD1C	39
GREB1	42
GRHPR	48
GSE1	70
GSKIP	27
GSR	55
GSTA3	55
GSTM3	43
GSTT1	36
GTF2H2C	31
GTF2H5	42
GTF2IP1	34
GTPBP8	27
GU228584	82
GUCD1	29
GUSBP1	32
GUSBP3	29
GUSBP4	29
GUSBP9	34
H19	64
H3F3AP4	83
H3F3C	41
HBEGF	29
HBS1L	50
HERC2P2	55
HERV-Fb1	77
HES1	81
HIF1A-AS2	35
HILPDA	40
HIPK1	51
HIST1H1E	38
HIST1H2AM	39
HIST1H2BC	38
HIST1H4C	76
HIST2H2AA3	48
HNRNPA1P10	30
HNRNPDL	83
HNRNPL	82
HNRNPU-AS1	53
HNRPF	44
HPS5	53
HSBP1L1	31
HSD17B7	35
HSD17B7P2	32
HSH2D	28
HSPA1B	63
HSPA2	35
HW120467	36
HW120475	65
HYPK	54
IDI2-AS1	37
IER3IP1	42
IFNLR1	28
IFT43	27
IFT74	34
IGF2	79
IGSF10	34
IL10RB	69
IL10RB-AS1	38
ILF3-AS1	35
INADL	33
INGX	32
INO80C	29
INS-IGF2	74
IQCB1	35
IRF2BPL	36
IST1	55
ISY1	26
ITFG3	47
JADE1	33
JADE3	34
JC037847	85
JPX	34
KANSL1	45
KANSL1L	26
KANSL2	38
KANSL3	36
KAT6A	53
KAT6B	44
KAT7	41
KATNBL1	51
KBTBD8	33
KCNQ1OT1	59
KDM4C	34
KDM5D	26
KIAA0040	62
KIAA0101	28
KIAA0102	48
KIAA0825	57
KIAA1244	37
KIAA1324	27
KIAA1328	80
KIAA1551	43
KIAA1586	41
KIAA1598	39
KIAA1683	30
KIAA1731	34
KIF13B	34
KIF1B	45
KIF21A	33
KLHL42	38
KMT2A	30
KMT2C	81
KMT2E	64
KNOP1	41
KNTC1	32
KXD1	35
L13713	85
L13714	86
L2HGDH	55
L3MBTL3	42
LAMTOR1	45
LAMTOR2	37
LAMTOR3	36
LAMTOR4	48
LAMTOR5	68
LARP4	54
LCLAT1	40
LINC00116	27
LINC00339	30
LINC00342	35
LINC00467	28
LINC00493	56
LINC00506	82
LINC00641	31
LINC00643	38
LINC00657	68
LINC00674	32
LINC00885	30
LINC00887	84
LINC00987	74
LINC00998	28
LINC01000	29
LOC100093631	36
LOC100129034	56
LOC100131564	28
LOC100190986	62
LOC100288778	26
LOC100289511	27
LOC100506710	29
LOC100507217	49
LOC100507577	60
LOC101926889	27
LOC101927354	47
LOC101927374	63
LOC101928600	33
LOC102288414	49
LOC102467081	34
LOC23117	67
LOC283788	36
LOC284454	43
LOC284889	73
LOC388692	39
LOC441081	41
LOC493754	33
LOC550643	39
LOC643406	56
LOC644215	70
LOC646214	60
LOC648987	30
LOC650368	74
LOC652276	38
LOC654342	33
LOC727896	32
LOC729603	35
LOC90834	63
LPP	54
LRRC16A	50
LRRC75A-AS1	74
LRTOMT	48
LSM8	36
LTN1	45
LUC7L2	43
MAB21L3	44
MALAT1	88
MANEAL	35
MAP3K13	61
MAP7D2	59
MAPK1IP1L	78
MARVELD3	44
MASTL	39
MAU2	26
MB21D2	47
MBNL1	49
MBOAT1	86
MCTP2	38
Metazoa	41
METTL15	31
METTL17	27
METTL21A	86
MGA	52
MGC4836	77
MGME1	30
MICU1	36
MICU2	46
MIEN1	54
MINOS1	58
MIPOL1	45
MIR205HG	44
MIR22HG	65
MIR6723	31
MIRLET7BHG	59
MIS18BP1	32
MLXIPL	27
MMAB	29
MOB1A	31
MOB3B	38
MOB4	49
MPC2	58
MPLKIP	37
MRAS	28
MRE11A	53
MROH1	41
MRPL22	42
MRPL30	40
MRPL53	41
MRPL54	32
MRPL57	60
MSANTD3	47
MSH5	27
MSMO1	54
MST4	60
MTCH2	49
MTFR1L	43
MTG1	28
MTHFS	30
MTPN	38
MTRNR2L2	87
MTRNR2L8	85
MVB12B	27
MYCBP	49
MYCL	31
MYNN	32
MYO7A	32
MZT2B	28
NAA38	40
NABP1	70
NADK2	40
NANS	29
NARG2	28
NAV2	60
NBEAL1	54
NBPF1	59
NBPF10	75
NBPF11	31
NBPF14	74
NBPF15	31
NBPF20	41
NBPF25P	26
NCKAP5	29
NCOA1	38
NDUFA3	48
NDUFA7	50
NDUFB2-AS1	37
NEAT1	86
NEIL2	28
NEK1	34
NEK5	35
NELFCD	46
NELFE	30
NEMF	68
NFATC3	64
NGFRAP1	75
NHP2L1	61
NIFK	38
NKX3-1	37
NME2	57
NMRK1	29
NPIPA8	37
NPIPB15	28
NPIPB3	40
NPIPB5	70
NR4A2	35
NR4A3	46
NR6A1	49
NREP	47
NSG1	33
NSRP1	60
NSUN5	30
NSUN6	31
NTMT1	31
NTPCR	33
NUAK2	29
NUP62	71
NUTM2A-AS1	41
OARD1	30
OCIAD2	28
OCLN	55
ODF2L	39
OPA1	33
ORC3	36
ORC4	82
ORC6	86
OSER1	53
OST4	74
OTUB1	51
P2RX5	38
PAGR1	28
PALM2-AKAP2	30
PAPD5	29
PAXBP1	31
PBDC1	48
PCDH11X	48
PCDH11Y	55
PDE4B	42
PDIA4	81
PDK1	35
PDXDC2P	31
PEG10	85
PEG3-AS1	85
PELO	31
PET100	73
PFKFB2	27
PGAM5	27
PGAP2	31
PGM5P2	39
PHKG1	58
PHLDA2	73
PHYHD1	27
PHYKPL	46
PI4K2A	34
PI4KAP1	49
PI4KAP2	67
PIKFYVE	32
PIM2	55
PINK1-AS	31
PITHD1	51
PKM	70
PLEC	33
PLEKHA8	33
PLEKHG4B	28
PLGLB1	44
PLGLB2	32
PLGRKT	31
PMF1	38
PMS1	29
PNISR	66
POGLUT1	32
POLDIP3	30
POLR2A	59
POLR2J	60
POLR2J2	57
POLR2J3	26
POTEE	27
POU6F2	31
PP14571	36
PPHLN1	47
PPP1CB	84
PPP1R12B	50
PPP1R9A	34
PPP2R2A	46
PPP2R2B	31
PPP3CA	52
PPP6R3	75
PRG2	33
PRKX	30
PROSER1	31
PRR14L	56
PRRC2B	44
PRRC2C	86
PRSS27	28
PSENEN	43
PSMA2	64
PSMD4	69
PSMD6-AS2	32
PSMD9	30
PTBLP	34
PTBP3	49
PTCHD4	69
PTER	32
PTGR1	27
PTPMT1	40
PTPRE	50
PTPRK	34
PTRHD1	47
PURB	27
PXDC1	63
PXN	67
PYROXD1	32
PYURF	48
R3HCC1L	38
R3HDM4	28
RAB10	41
RAB15	26
RAB30	57
RAB3IP	33
RABGAP1L	60
RABGEF1	53
RAD51D	27
RANBP17	35
RAPGEF6	30
RASEF	76
RASGRP3	32
RBBP5	46
RBFOX2	55
RBM14-RBM4	28
RBM3	62
RBM34	40
RBM41	30
RBM48	27
RBMS3	41
RBMX	67
RBMXL1	28
RBSG1	28
RCC2	42
RFFL	31
RGPD1	71
RGPD2	63
RGPD4	56
RGPD5	62
RGPD6	61
RGPD8	33
RGS16	31
RHOB	74
RIF1	51
RMDN3	26
RMI2	32
RN7SK	58
RN7SL1	35
RN7SL2	35
RNA18S5	86
RNA28S5	87
RNA45S5	85
RNASEK	73
RNASEK-C17orf49	52
RNF144A-AS1	32
RNVU1-18	35
RP11-14N7.2	46
RP11-261C10.3	37
RP11-266L9.2	49
RP11-314D7.2	43
RP11-538P18.2	49
RP11-72L22.1	29
RP5-1010E17.2	34
RPAIN	55
RPAP3	29
RPL17-C18orf32	49
RPL36A-HNRNPH2	61
RPL41	87
RPP14	26
RPS10-NUDT3	27
RPS14P3	26
RPS17L	78
RRP15	28
RRP7B	32
RSRP1	52
RTCA	35
RTCB	49
RTFDC1	49
RUSC1-AS1	38
SBDS	58
SBNO1	74
SC5D	28
SCAF11	69
SCAF8	42
SCHIP1	39
SEC22B	83
SELK	79
SELT	59
SEMA4D	38
SEMA6D	62
SEPP1	58
SEPW1	47
SERF2	80
SERPINE3	30
SF3B6	68
SFMBT2	37
SFSWAP	35
SH3BGRL2	60
SHISA9	80
SIKE1	38
SLC12A2	35
SLC16A5	26
SLC18B1	46
SLC25A5-AS1	37
SLC35A1	32
SLC35E2	30
SLC35F6	33
SLC39A11	47
SLC50A1	42
SLC52A1	57
SLC7A5P2	54
SLC9A4	57
SLIRP	69
SLX1B	43
SMA4	59
SMC2	34
SMDT1	54
SMG1P1	54
SMG1P2	70
SMG1P3	53
SMG9	29
SMIM14	42
SMIM15	29
SMIM19	33
SMIM20	29
SMIM7	52
SMN1	32
SMN2	58
SNAPC1	29
SNCA	27
SND1-IT1	48
SNHG1	65
SNHG12	72
SNHG16	69
SNHG3	51
SNHG5	67
SNHG6	48
SNHG8	68
SNORA33	73
SNORD3A	29
SNX22	73
SNX29P2	41
SPATS2L	33
SPECC1L	33
SPG11	34
SPICE1	34
SPIDR	55
SPPL3	49
SPRY2	26
SPTSSA	41
SREK1	71
SREK1IP1	30
SRGAP1	34
SRGAP2C	64
SRSF1	37
SRSF10	68
SRSF11	85
SRSF2	86
SRSF3	88
SRSF4	42
SRSF5	85
SRSF6	88
SRSF7	75
SRSF8	30
SRSF9	66
ST8SIA6-AS1	28
STAG3L2	38
STARD10	33
STARD4-AS1	30
STAU2	29
STON1-GTF2A1L	28
STRBP	34
STX16	34
SUCO	73
SULT1A3	46
SUMO1P3	37
SUPT20H	51
SVIL	41
SYCP2L	29
SYNRG	34
TAB2	32
TAB3	31
TATDN3	29
TBC1D24	30
TBC1D32	27
TBC1D8B	84
TCEANC	28
TCF7L2	71
TDRP	46
TENM3	78
TERF1	27
TEX30	40
TFDP2	74
THUMPD3-AS1	54
TIMM10B	40
TIMM21	37
TIMM23	41
TIMMDC1	57
TINCR	39
TIPARP	41
TLCD2	47
TLDC1	45
TM9SF1	30
TMA16	27
TMA7	72
TMBIM4	69
TMC5	27
TMED7	42
TMEM135	32
TMEM140	32
TMEM141	26
TMEM144	31
TMEM170A	68
TMEM205	33
TMEM212	33
TMEM230	52
TMEM242	31
TMEM243	27
TMEM245	64
TMEM248	43
TMEM251	26
TMEM254	26
TMEM258	75
TMEM263	69
TMEM52B	33
TMEM69	34
TMEM97	31
TMX2	49
TNFAIP8L2-SCNM1	29
TNRC6B	62
TOMM5	54
TOMM7	55
TONSL	32
TP63	48
TPD52L2	29
TPGS2	32
TPT1-AS1	60
TPTEP1	28
TRAPPC5	37
TRAPPC8	38
TRIAP1	42
TRMT10C	40
TRMT112	71
tRNA(Ile)	87
TROVE2	36
TSC1	74
TSG-12	37
TTTY15	41
TUBB2C	54
TUBB4B	68
TUG1	55
TULP4	74
TVP23B	50
TVP23C	28
TYW3	31
U02063	86
U2AF1L4	31
U2SURP	59
U67832	28
UBBP4	46
UFL1	50
UGDH-AS1	86
UGT8	29
ULBP3	50
UMPS	40
UPK3BL	57
UQCC2	57
URGCP-MRPS24	31
URI1	26
USP31	43
UTP14A	30
VIMP	62
VKORC1	30
VMP1	66
VPS13A	37
VPS13B	27
VPS51	28
VRK2	37
WBP1L	52
WDR45B	28
WDR83OS	64
WLS	68
WNK4	27
WNT3	30
WRN	28
XKR9	38
XPNPEP3	29
Y16709	76
YAF2	27
YBX3	67
Z24749	32
ZAK	33
ZBED5-AS1	35
ZBTB8A	32
ZC2HC1A	27
ZDHHC8P1	35
ZFAS1	72
ZFHX3	74
ZFP36	60
ZFP36L1	83
ZMAT3	37
ZMYM5	30
ZNF106	53
ZNF252P	29
ZNF268	27
ZNF462	28
ZNF490	43
ZNF518A	34
ZNF526	82
ZNF543	42
ZNF587	29
ZNF652	71
ZNF702P	31

## Sheet: S4
Table S4: G-protein coupled receptor genes expressed beyond 10 TPM on average in single clusters. The genes marked in red are specific in single clusters.
CYT1	CYT2	CYT3	DC	EVT	SYN	DEC	ESF
ACKR2	ACKR2	ACKR2	S1PR2	ACKR2	ACKR2	ACKR3	CHRM2
ADRA2C	ADRB1	ADRB1	TPRA1	ACKR3	ADRB1	ADRA2C	F2R
ADRB1	BDKRB1	EDNRB	C5AR1	CXCR4	C5AR1	CHRM2	F2RL1
CALCRL	FZD10	F2RL2	GPR84	EDNRB	CXCR4	EDNRB	F2RL2
FZD10	GPR137	FZD10	OPN3	GPR1	EDNRB	F2R	FZD2
GPR137	GPR143	GPR137	CXCR4	GPR146	FZD2	F2RL1	FZD6
GPR171	GPR171	GPR143	GPR183	GPR78	GPR107	F2RL2	GPR1
GPR87	GPR87	GPR171	GPR65	GPRC5A	GPR143	FZD2	GPR107
GPRC5D	LGR4	GPR87	P2RY13	HCAR1	GPR146	FZD6	GPR137
LGR4	LGR5	LGR4	PTAFR	LGR4	GPR183	GPR1	GPR157
LGR5	OPN3	LGR5	SUCNR1	OPN3	GPR78	GPR107	GPR176
OPN3	P2RY6	OPN3	ADORA2B	S1PR2	GPR84	GPR137	GPRC5A
P2RY6	S1PR2	P2RY6	C3AR1	CCR1	GPRC5A	GPR157	HTR2B
S1PR2	TPRA1	S1PR2	CCR7	CHRM5	GPRC5B	GPR176	LGR4
TPRA1	CYSLTR2	TPRA1	CCRL2	HCAR2	GPRC5D	GPRC5A	LPAR1
FZD3	GPR22	CXCR6	CYSLTR1	HCAR3	HCAR1	GPRC5B	LPAR6
MC1R		FZD5	FPR1		LGR4	HTR2B	MRGPRF
		GPR37	FPR3		LPAR1	LGR4	OPN3
					LPAR6	LPAR1	OXTR
					OPN3	LPAR6	S1PR1
					P2RY6	MRGPRF	S1PR3
					S1PR2	OPN3	SMO
					AGTR1	OXTR	SSTR1
					APLNR	S1PR1	TPRA1
					CX3CR1	S1PR3	HRH1
					GPR34	SMO
						SSTR1
						TPRA1
						ADRA2A
						BDKRB2
						FZD4
						HTR1B

## Sheet: S5
TableS5: The paired list of interacting ligands and receptors used in the analysis of putative interactions.
The information is combined fromtwo databases: http://www.guidetopharmacology.org; http://dip.doe-mbi.ucla.edu/dip/DLRP.cgi and augmented by some of the pairs that do not define receptor-ligand relationship, but rather the receptor - [last enzyme of biosynthetic pathway producing the ligand]-reationship. These are mostly prostaglandin and steroid pathways, discussed in greater detail in the manus…
Receptor	Ligand
VIPR1	ADCYAP1
VIPR2	ADCYAP1
ADCYAP1R1	ADCYAP1
CALCR	ADM
CALCRL	ADM
MC1R	AGRP
MC2R	AGRP
MC3R	AGRP
MC4R	AGRP
MC5R	AGRP
AGTR1	AGT
AGTR2	AGT
CYSLTR1	ALOX5
CYSLTR2	ALOX5
FPR2	ALOX5
CYSLTR2	ALOX5AP
CYSLTR1	ALOX5AP
FPR2	ALOX5AP
FPR1	ANXA1
FPR2	ANXA1
APLNR	APLN
MC1R	ASIP
MC2R	ASIP
MC3R	ASIP
MC4R	ASIP
MC5R	ASIP
AVPR1A	AVP
AVPR1B	AVP
OXTR	AVP
HCAR2	BDH1
C3AR1	C3
C5AR1	C3
C3AR1	C5
C5AR1	C5
C5AR2	C5
CALCR	CALCA
CCKAR	CCK
CCKBR	CCK
CCR8	CCL1
ACKR1	CCL11
ACKR2	CCL11
CCR2	CCL11
CCR3	CCL11
CCR5	CCL11
ACKR2	CCL13
CCR1	CCL13
CCR2	CCL13
CCR3	CCL13
ACKR1	CCL14
ACKR2	CCL14
CCR1	CCL14
CCR5	CCL14
CCR1	CCL15
CCR3	CCL15
CCR1	CCL16
CCR2	CCL16
CCR5	CCL16
ACKR1	CCL17
ACKR2	CCL17
CCR4	CCL17
ACKR4	CCL19
ACKR4	CCL19
CCR7	CCL19
CCRL2	CCl19
ACKR1	CCL2
ACKR2	CCL2
CCR3	CCL2
CCR5	CCL2
CCR6	CCL20
ACKR4	CCL21
ACKR4	CCL21
CCR7	CCL21
ACKR2	CCL22
CCR4	CCL22
CCR1	CCL23
CCR3	CCL24
ACKR4	CCL25
ACKR4	CCL25
CCR9	CCL25
CCR2	CCL26
CCR3	CCL26
CCR10	CCL27
CCR10	CCL28
CCR3	CCL28
ACKR2	CCL3
CCR1	CCL3
CCR5	CCL3
ACKR2	CCL4
CCR1	CCL4
CCR5	CCL4
ACKR1	CCL5
ACKR2	CCL5
CCR1	CCL5
CCR3	CCL5
CCR5	CCL5
ACKR1	CCL7
ACKR2	CCL7
CCR1	CCL7
CCR2	CCL7
CCR3	CCL7
CCR5	CCL7
ACKR2	CCL8
CCR1	CCL8
CCR2	CCL8
CCR3	CCL8
CCR5	CCL8
LHCGR	CGB
CHRM1	CHAT
CHRM2	CHAT
CHRM3	CHAT
CHRM4	CHAT
CHRM5	CHAT
SSTR1	CORT
SSTR2	CORT
SSTR3	CORT
SSTR4	CORT
SSTR5	CORT
CRHR1	CRH
CRHR2	CRH
FPR1	CTSG
F2RL3	CTSG
CX3CR1	CX3CL1
CXCR1	CXCL1
CXCR2	CXCL1
CXCR3	CXCL10
ACKR1	CXCL11
ACKR3	CXCL11
CXCR3	CXCL11
ACKR3	CXCL12
CXCR4	CXCL12
CXCR5	CXCL13
CXCR6	CXCL16
CXCR2	CXCL2
CXCR2	CXCL3
ACKR1	CXCL5
CXCR2	CXCL5
ACKR1	CXCL6
CXCR1	CXCL6
CXCR2	CXCL6
CXCR2	CXCL7
ACKR1	CXCL8
CXCR1	CXCL8
CXCR2	CXCL8
CXCR3	CXCL9
GPER1	CYP19A1
LTB4R2	CYP2S1
HTR1A	DDC
HTR1B	DDC
HTR1D	DDC
HTR1E	DDC
HTR1F	DDC
HTR2A	DDC
HTR2B	DDC
HTR2C	DDC
HTR4	DDC
HTR5A	DDC
HTR5BP	DDC
HTR6	DDC
HTR7	DDC
DRD1	DDC
DRD2	DDC
DRD3	DDC
DRD4	DDC
DRD5	DDC
TAAR1	DDC
CCR6	DEFB4A
EDNRA	EDN1
EDNRB	EDN1
EDNRA	EDN2
EDNRB	EDN2
EDNRA	EDN3
EDNRB	EDN3
F2R	F2
F2RL2	F2
F2RL3	F2
GRM1	FCTD
GRM2	FCTD
GRM3	FCTD
GRM4	FCTD
GRM5	FCTD
GRM6	FCTD
GRM7	FCTD
GRM8	FCTD
FSHR	FSHB
GALR1	GAL
GALR2	GAL
GALR3	GAL
GALR1	GALP
GALR2	GALP
GALR3	GALP
GCGR	GCG
GLP1R	GCG
GLP2R	GCG
VIPR1	GHRH
VIPR2	GHRH
GHRHR	GHRH
GHSR	GHRL
ADGRB2	GIP
GIPR	GIP
GRM1	GLS1
GRM2	GLS1
GRM3	GLS1
GRM4	GLS1
GRM5	GLS1
GRM6	GLS1
GRM7	GLS1
GRM8	GLS1
GRM1	GLS2
GRM2	GLS2
GRM3	GLS2
GRM4	GLS2
GRM5	GLS2
GRM6	GLS2
GRM7	GLS2
GRM8	GLS2
GRM1	GLUD1
GRM2	GLUD1
GRM3	GLUD1
GRM4	GLUD1
GRM5	GLUD1
GRM6	GLUD1
GRM7	GLUD1
GRM8	GLUD1
OXGR1	GLUD1
GRM1	GLUD2
GRM2	GLUD2
GRM3	GLUD2
GRM4	GLUD2
GRM5	GLUD2
GRM6	GLUD2
GRM7	GLUD2
GRM8	GLUD2
OXGR1	GLUD2
GNRHR	GNRH1
GNRHR2	GNRH1
GNRHR	GNRH2
GNRHR2	GNRH2
BRS3	GRP
GRPR	GRP
HCRTR1	HCRT
HCRTR2	HCRT
HRH1	HDC
HRH2	HDC
HRH3	HDC
HRH4	HDC
FPR3	HEBP1
TBXA2R	HPGDS
GPER1	HSD17B1
GPER1	HSD17B2
CALCR	IAPP
OXGR1	IDH1
OXGR1	IDH2
RXFP2	INSL3
RXFP4	INSL5
KISS1R	KISS1
BDKRB1	KNG1
BDKRB2	KNG1
HCAR1	LDHA
LHCGR	LHB
LTB4R	LTA4H
MLNR	MLN
F2R	MMP1
F2R	MMP13
FPR3	MT-RNR2
FZD4	NDP
BRS3	NMB
GRPR	NMB
NMBR	NMB
NMUR1	NMS
NMUR2	NMS
NMUR1	NMU
NMUR2	NMU
NPSR1	NPS
NPY1R	NPY
NPY2R	NPY
NPY4R	NPY
NPY5R	NPY
NTSR1	NTS
NTSR2	NTS
AVPR1A	OXT
AVPR1B	OXT
AVPR2	OXT
AVPR2	OXT
OXTR	OXT
OPRD1	PDYN
OPRK1	PDYN
OPRM1	PDYN
OPRD1	PENK
OPRK1	PENK
OPRM1	PENK
MCHR1	PMCH
MCHR2	PMCH
ADRA1A	PNMT
ADRA1B	PNMT
ADRA1D	PNMT
ADRA2A	PNMT
ADRA2B	PNMT
ADRA2C	PNMT
ADRB1	PNMT
ADRB2	PNMT
ADRB3	PNMT
OPRL1	PNOC
MC1R	POMC
MC2R	POMC
MC3R	POMC
MC4R	POMC
MC5R	POMC
OPRD1	POMC
OPRK1	POMC
OPRM1	POMC
NPY1R	PPY
NPY2R	PPY
NPY4R	PPY
NPY5R	PPY
PRLHR	PRLH
F2R	PROC
PROKR1	PROK1
PROKR2	PROK1
PROKR1	PROK2
PROKR2	PROK2
ADGRB1	PTDSS1
TBXA2R	PTGES
TBXA2R	PTGIS
TBXA2R	PTGS1
TBXA2R	PTGS2
FPR2	PTGS2
PTH1R	PTH
PTH2R	PTH
PTH2R	PTH2
PTH1R	PTHLH
PTH2R	PTHLH
NPY1R	PYY
NPY2R	PYY
NPY4R	PYY
NPY5R	PYY
QRFPR	QRFP
CMKLR1	RARRES2
RXFP1	RLN1
RXFP2	RLN1
RXFP1	RLN2
RXFP2	RLN2
RXFP3	RLN2
RXFP1	RLN3
RXFP2	RLN3
RXFP3	RLN3
RXFP4	RLN3
VIPR1	SCT
VIPR2	SCT
SCTR	SCT
SSTR1	SST
SSTR2	SST
SSTR3	SST
SSTR4	SST
SSTR5	SST
GPR107	SST
TACR1	TAC1
TACR2	TAC1
TACR1	TAC3
TACR2	TAC3
TACR3	TAC3
TBXA2R	TBXAS1
MTNR1A	TPH1
MTNR1B	TPH1
TRHR	TRH
TSHR	TSHB
CRHR1	UCN
CRHR2	UCN
UTS2R	UTS2
UTS2R	UTS2B
VIPR1	VIP
VIPR2	VIP
ADCYAP1R1	VIP
FZD1	WNT1
FZD1	WNT2
FZD3	WNT2
FZD8	WNT2
FZD9	WNT2
FZD3	WNT3
FZD7	WNT3
FZD1	WNT3A
FZD5	WNT3A
FZD6	WNT3A
FZD7	WNT3A
FZD8	WNT3A
FZD6	WNT4
FZD1	WNT5A
FZD2	WNT5A
FZD3	WNT5A
FZD5	WNT5A
FZD6	WNT5A
FZD7	WNT5A
FZD10	WNT7A
FZD5	WNT7A
FZD7	WNT7A
FZD9	WNT7A
FZD1	WNT7B
FZD10	WNT7B
FZD8	WNT9B
XCR1	XCL1
XCR1	XCL2
LPAR1	ENPP2
LPAR2	ENPP2
LPAR3	ENPP2
LPAR4	ENPP2
LPAR5	ENPP2
LPAR6	ENPP2
S1PR1	ENPP2
S1PR1	ASAH1
S1PR1	ASAH2
S1PR1	ASAH2B
S1PR1	ASAH2C
S1PR1	ACER1
S1PR1	ACER2
S1PR1	ACER3
S1PR2	ENPP2
S1PR2	ASAH1
S1PR2	ASAH2
S1PR2	ASAH2B
S1PR2	ASAH2C
S1PR2	ACER1
S1PR2	ACER2
S1PR2	ACER3
S1PR3	ENPP2
S1PR3	ASAH1
S1PR3	ASAH2
S1PR3	ASAH2B
S1PR3	ASAH2C
S1PR3	ACER1
S1PR3	ACER2
S1PR3	ACER3
S1PR4	ENPP2
S1PR4	ASAH1
S1PR4	ASAH2
S1PR4	ASAH2B
S1PR4	ASAH2C
S1PR4	ACER1
S1PR4	ACER2
S1PR4	ACER3
S1PR5	ENPP2
S1PR5	ASAH1
S1PR5	ASAH2
S1PR5	ASAH2B
S1PR5	ASAH2C
S1PR5	ACER1
S1PR5	ACER2
S1PR5	ACER3
NPFFR1	NPFF
NPFFR1	NPVF
NPFFR2	NPFF
NPFFR2	NPVF
NPBWR1	NPB
NPBWR1	NPW
NPBWR2	NPB
NPBWR2	NPW
GPR107	SST
PTGDR	PTGS2
PTGDR	PTGES
PTGDR	PTGES2
PTGDR	PTGES3
PTGDR	PTGDS
PTGDR	PTGIS
PTGDR	TBXAS1
PTGDR2	PTGS2
PTGDR2	PTGES
PTGDR2	PTGES2
PTGDR2	PTGES3
PTGDR2	PTGDS
PTGDR2	PTGIS
PTGDR2	TBXAS1
PTGER1	PTGS2
PTGER1	PTGES
PTGER1	PTGES2
PTGER1	PTGES3
PTGER1	PTGDS
PTGER1	PTGIS
PTGER1	TBXAS1
PTGER2	PTGS2
PTGER2	PTGES
PTGER2	PTGES2
PTGER2	PTGES3
PTGER2	PTGDS
PTGER2	PTGIS
PTGER3	PTGS2
PTGER3	PTGES
PTGER3	PTGES2
PTGER3	PTGES3
PTGER3	PTGDS
PTGER3	PTGIS
PTGER4	PTGS2
PTGER4	PTGES
PTGER4	PTGES2
PTGER4	PTGES3
PTGER4	PTGDS
PTGER4	PTGIS
PTGFR	PTGS2
PTGFR	PTGES
PTGFR	PTGES2
PTGFR	PTGES3
PTGFR	PTGDS
PTGFR	PTGIS
PTGIR	PTGS2
PTGIR	PTGES
PTGIR	PTGES2
PTGIR	PTGES3
PTGIR	PTGDS
PTGIR	PTGIS
SUCNR1	SDHA
SUCNR1	SDHB
SUCNR1	SDHC
SUCNR1	SDHD
PAQR7	HSD3B1
GPER	HSD17B2
PAQR3	HSD3B1
PAQR4	HSD3B1
PAQR5	HSD3B1
PAQR6	HSD3B1
PAQR8	HSD3B1
PAQR9	HSD3B1
NOTCH1	DLK1
NOTCH2	DLK1
NOTCH3	DLK1
NOTCH4	DLK1
NOTCH1	JAG1
NOTCH2	JAG1
NOTCH3	JAG1
NOTCH4	JAG1
NOTCH1	JAG2
NOTCH2	JAG2
NOTCH3	JAG2
NOTCH4	JAG2
NOTCH1	DLL1
NOTCH2	DLL1
NOTCH3	DLL1
NOTCH4	DLL1
NOTCH1	DLL3
NOTCH2	DLL3
NOTCH3	DLL3
NOTCH4	DLL3
NOTCH1	DLL4
NOTCH2	DLL4
NOTCH3	DLL4
NOTCH4	DLL4
EPHA1	EFNA1
EPHA2	EFNA1
EPHA3	EFNA1
EPHA4	EFNA1
EPHA5	EFNA1
EPHA7	EFNA1
EPHA8	EFNA1
EPHA1	EFNA2
EPHA2	EFNA2
EPHA3	EFNA2
EPHA4	EFNA2
EPHA5	EFNA2
EPHA7	EFNA2
EPHA8	EFNA2
EPHA1	EFNA3
EPHA2	EFNA3
EPHA3	EFNA3
EPHA4	EFNA3
EPHA5	EFNA3
EPHA7	EFNA3
EPHA8	EFNA3
EPHA1	EFNA4
EPHA2	EFNA4
EPHA3	EFNA4
EPHA4	EFNA4
EPHA5	EFNA4
EPHA7	EFNA4
EPHA8	EFNA4
EPHA1	EFNA5
EPHA2	EFNA5
EPHA3	EFNA5
EPHA4	EFNA5
EPHA5	EFNA5
EPHA7	EFNA5
EPHA8	EFNA5
EPHB1	EFNB1
EPHB2	EFNB1
EPHB3	EFNB1
EPHB4	EFNB1
EPHB6	EFNB1
EPHA4	EFNB1
EPHB1	EFNB2
EPHB2	EFNB2
EPHB3	EFNB2
EPHB4	EFNB2
EPHB6	EFNB2
EPHA4	EFNB2
EPHB1	EFNB3
EPHB2	EFNB3
EPHB3	EFNB3
EPHB4	EFNB3
EPHB6	EFNB3
EPHA4	EFNB3
TNFRSF1A	TNF
TNFRSF1B	TNF
LTBR	TNF
TNFRSF7	TNFSF7
TNFRSF1A	LTA
TNFRSF1B	LTA
TNFRSF14	LTA
LTBR	LTA
TNFRSF8	TNFSF8
LTBR	LTB
TNFRSF5	TNFSF5
TNFRSF6	TNFSF6
TNFRSF6B	TNFSF6
TNFRSF10A	TNFSF10
TNFRSF10B	TNFSF10
TNFRSF10C	TNFSF10
TNFRSF10D	TNFSF10
TNFRSF11B	TNFSF10
TNFRSF11A	TNFSF11
TNFRSF11B	TNFSF11
TNFRSF9	TNFSF9
TNFRSF4	TNFSF4
TNFRSF14	TNFSF14
TNFRSF6B	TNFSF14
LTBR	TNFSF14
TNFRSF12	TNFSF12
TNFRSF18	TNFSF18
IL2RA	IL2
IL2RB	IL2
IL2RG	IL2
IL7R	IL7
IL2RG	IL7
IL9R	IL9
IL2RG	IL9
IL15RA	IL15
IL2RB	IL15
IL2RG	IL15
IL4R	IL4
IL2RG	IL4
IL13RA1	IL4
IL13RA1	IL13
IL13RA2	IL13
IL4R	IL13
IL2RG	IL13
IL3RA	IL3
CSF2RB	IL3
IL5RA	IL5
IL1RL1	IL33
CSF2RB	IL5
CSF2RA	CSF2
CSF2RB	CSF2
IFNGR1	IFNG
IFNGR2	IFNG
IL10RA	IL10
IL10RB	IL10
IL17R	IL17
CD4	IL16
IL12RB1	IL12A
IL12RB2	IL12A
IL12RB1	IL12B
IL12RB2	IL12B
IFNAR1	IFNA4
IFNAR2	IFNA4
IFNAR1	IFNA1
IFNAR2	IFNA1
IFNAR1	IFNA5
IFNAR2	IFNA5
IFNAR1	IFNA16
IFNAR2	IFNA16
IFNAR1	IFNA8
IFNAR2	IFNA8
IFNAR1	IFNA14
IFNAR2	IFNA14
IFNAR1	IFNA21
IFNAR2	IFNA21
IFNAR1	IFNA2
IFNAR2	IFNA2
IFNAR1	IFNA13
IFNAR2	IFNA13
IFNAR1	IFNA6
IFNAR2	IFNA6
IFNAR1	IFNA7
IFNAR2	IFNA7
IFNAR1	IFNA10
IFNAR2	IFNA10
IFNAR1	IFNA17
IFNAR2	IFNA17
IFNAR1	IFNW1
IFNAR2	IFNW1
IFNAR1	IFNB1
IFNAR2	IFNB1
IL1R1	IL1A
IL1R2	IL1A
IL1R1	IL1B
IL1R2	IL1B
IL1R1	IL1RN
IL1R2	IL1RN
IL18R1	IL18
IL18RAP	IL18
IGF1R	IGF1
IGF1R	IGF2
IGF2R	IGF2
INSR	INS
MET	HGF
MST1R	MST1
FGFR1	FGF1
FGFR2	FGF1
FGFR3	FGF1
FGFR4	FGF1
FGFR1	FGF2
FGFR2	FGF2
FGFR3	FGF2
FGFR4	FGF2
FGFR1	FGF3
FGFR2	FGF3
FGFR1	FGF4
FGFR2	FGF4
FGFR3	FGF4
FGFR4	FGF4
FGFR1	FGF5
FGFR2	FGF5
FGFR3	FGF5
FGFR1	FGF6
FGFR2	FGF6
FGFR4	FGF6
FGFR2	FGF7
FGFR2	FGF8
FGFR3	FGF8
FGFR4	FGF8
FGFR1	FGF9
FGFR2	FGF9
FGFR3	FGF9
FGFR4	FGF9
FGFR1	FGF10
FGFR2	FGF10
FGFR3	FGF10
FGFR4	FGF10
FGFR1	FGF11
FGFR2	FGF11
FGFR3	FGF11
FGFR4	FGF11
FGFR1	FGF12
FGFR2	FGF12
FGFR3	FGF12
FGFR4	FGF12
FGFR1	FGF12B
FGFR2	FGF12B
FGFR3	FGF12B
FGFR4	FGF12B
FGFR1	FGF13
FGFR2	FGF13
FGFR3	FGF13
FGFR4	FGF13
FGFR1	FGF14
FGFR2	FGF14
FGFR3	FGF14
FGFR4	FGF14
FGFR1	FGF16
FGFR2	FGF16
FGFR3	FGF16
FGFR4	FGF16
FGFR1	FGF17
FGFR2	FGF17
FGFR3	FGF17
FGFR4	FGF17
FGFR1	FGF18
FGFR2	FGF18
FGFR3	FGF18
FGFR4	FGF18
FGFR1	FGF19
FGFR2	FGF19
FGFR3	FGF19
FGFR4	FGF19
NTRK1	NGFB
NGFR	NGFB
NTRK2	BDNF
NGFR	BDNF
NTRK1	NTF3
NTRK2	NTF3
NTRK3	NTF3
NGFR	NTF3
NTRK1	NTF5
NTRK2	NTF5
NTRK3	NTF5
NGFR	NTF5
MPL	THPO
EPOR	EPO
TEK	ANGPT1
TEK	ANGPT2
TEK	ANGPTL1
PDGFRA	PDGFA
PDGFRA	PDGFB
PDGFRB	PDGFB
FLT1	VEGF
KDR	VEGF
NRP1	VEGF
NRP2	VEGF
FLT1	VEGFB
NRP1	VEGFB
KDR	VEGFC
FLT4	VEGFC
KDR	FIGF
FLT4	FIGF
FLT1	PGF
NRP1	PGF
EGFR	EGF
EGFR	TGFA
EGFR	AREG
EGFR	BTC
ERBB3	BTC
ERBB4	BTC
ERBB4	NRG1
ERBB3	NRG1
ERBB2	NRG1
EGFR	DTR
ERBB4	DTR
EGFR	EREG
ERBB4	EREG
IL11RA	IL11
IL6ST	IL11
CSF3R	CSF3
LEPR	LEP
IL6R	IL6
IL6ST	IL6
LIFR	LIF
IL6ST	LIF
IL6ST	CTF1
LIFR	CTF1
CNTFR	CNTF
IL6ST	CNTF
LIFR	CNTF
OSMR	OSM
IL6ST	OSM
LIFR	OSM
KIT	SCGF
FLT3	FLT3LG
CSF1R	CSF1
PTPRZ1	MDK
PTPRB	MDK
PTPRZ1	PTN
PTPRB	PTN
KIAA0468	PTN
TGFBR1	TGFB1
TGFBR2	TGFB1
TGFBR3	TGFB1
TGFBR1	TGFB2
TGFBR2	TGFB2
TGFBR3	TGFB2
TGFBR1	TGFB3
TGFBR2	TGFB3
TGFBR3	TGFB3
BMPR1A	BMP2
BMPR1B	BMP2
BMPR2	BMP2
ACVR1	BMP2
ACVR2	BMP2
ACVR2B	BMP2
BMPR1A	BMP3
BMPR1B	BMP3
BMPR2	BMP3
ACVR1	BMP3
ACVR2	BMP3
ACVR2B	BMP3
BMPR1A	BMP4
BMPR1B	BMP4
BMPR2	BMP4
ACVR1	BMP4
ACVR2	BMP4
ACVR2B	BMP4
BMPR1A	BMP5
BMPR1B	BMP5
BMPR2	BMP5
ACVR1	BMP5
ACVR2	BMP5
ACVR2B	BMP5
BMPR1A	BMP6
BMPR1B	BMP6
BMPR2	BMP6
ACVR1	BMP6
ACVR2	BMP6
ACVR2B	BMP6
BMPR1A	BMP7
BMPR1B	BMP7
BMPR2	BMP7
ACVR1	BMP7
ACVR2	BMP7
ACVR2B	BMP7
BMPR1A	BMP8
BMPR1B	BMP8
BMPR2	BMP8
ACVR1	BMP8
ACVR2	BMP8
ACVR2B	BMP8
BMPR1A	BMP10
BMPR1B	BMP10
BMPR2	BMP10
ACVR1	BMP10
ACVR2	BMP10
ACVR2B	BMP10
BMPR1A	BMP15
BMPR1B	BMP15
BMPR2	BMP15
ACVR1	BMP15
ACVR2	BMP15
ACVR2B	BMP15
ACVR1	INHBA
ACVR1B	INHBA
ACVR2	INHBA
ACVR2B	INHBA
ACVR1	INHBB
ACVR1B	INHBB
ACVR2	INHBB
ACVR2B	INHBB
ACVR1	INHBC
ACVR1B	INHBC
ACVR2	INHBC
ACVR2B	INHBC
ACVR1	INHA
ACVR1B	INHA
ACVR2	INHA
ACVR2B	INHA
AMHR2	AMH
CCXCR1	SCYC1
CCXCR1	SCYC2
CX3CR1	SCYD1
CCR3	SCYA11
GPR9	SCYA11
CCBP2	SCYA11
CCR5	SCYA11
CCR3	SCYA24
CCR1	SCYA23
CCR1	SCYA14
CCBP2	SCYA14
CCR3	SCYA26
CCR1	SCYA3
CCR5	SCYA3
CCR5	SCYA4
CCR8	SCYA4
CCR1	SCYA4
CCBP2	SCYA4
CCR1	SCYA15
CCR3	SCYA15
CCR8	SCYA1
CCR7	SCYA21
GPR9	SCYA21
CCR1	SCYA5
CCR3	SCYA5
CCR4	SCYA5
CCR5	SCYA5
FY	SCYA5
CCBP2	SCYA5
CCR2	SCYA2
FY	SCYA2
CCR1	SCYA2
CCBP2	SCYA2
CCR2	SCYA8
CCR3	SCYA8
CCR5	SCYA8
CCR1	SCYA8
CCBP2	SCYA8
GPR2	SCYA27
CCR1	SCYA7
CCR2	SCYA7
CCR3	SCYA7
CCR5	SCYA7
CCBP2	SCYA7
CCR2	SCYA13
CCR3	SCYA13
CCR1	SCYA13
CCR5	SCYA13
CCBP2	SCYA13
CCR4	SCYA17
CCR8	SCYA17
CCR6	SCYA20
CCR7	SCYA19
CCR9	SCYA25
CCR4	SCYA22
IL8RA	IL8
IL8RB	IL8
FY	IL8
IL8RA	SCYB6
IL8RB	SCYB6
GPR9	MIG
CXCR4	SDF1
GPR9	SCYB11
IL8RB	SCYB5
IL8RA	SCYB5
GPR9	SCYB10
IL8RB	PPBP
FY	PPBP
IL8RB	GRO1
FY	GRO1
IL8RB	GRO2
IL8RB	GRO3
BLR1	SCYB13
PRLR	PRL
GHR	GH1
GHR	GH2
GHR	CSH1
GHR	CSH2
GHR	CSHL1
PRLR	GH1
PRLR	GH2
PRLR	CSH1
PRLR	CSH2
PRLR	CSHL1
PGR	HSD3B1
NR3C1	HSD3B1
NR3C1	HSD11B1
ESR1	HSD17B2
ESR2	HSD17B2
